# Supplementary material for: Identification and Characterization of MAPK Signaling Pathway Genes and Associated lncRNAs in the Ileum of Piglets Infected by Clostridium perfringens Type C
Source: Biomed Res Int. 2020 Aug 12;2020:8496872. doi: 10.1155/2020/8496872 (PMC7443001; doi:10.1155/2020/8496872)
Supplement: Supplementary Materials — Additional file: Table S1: list of differentially expressed genes and immune-related KEGG enrichment pathways in the ileum of piglets infected with Clostridium perfringens type C. Table S2: primer sequences for the real-time PCR analysis of genes and lncRNAs associated with MAPK signaling pathway genes. Table S3: list of 35 lncRNAs targeting MAPK signaling pathway genes and differentially expressed in the ileum of C. perfringens type C-infected piglets. [file 8496872.f1.zip › Table S1.xlsx]

## Sheet: Table. S1-1
List of 2004 differentially expressed genes
transcript_id	gene_id	gene_name	gene_location	IR_FPKM	IC_FPKM	log2(foldchange)	pvalue	qvalue	IS_FPKM	IC_FPKM	log2(foldchange)	pvalue	qvalue
ENSSSCT00000024795	ENSSSCG00000023149	HIST1H2AC	chr7:22094864-22095327	2591.02	7200.2	-1.47452	0.00015	0.00297337	2342.7	7200.2	-1.61987	5e-05	0.00119245
ENSSSCT00000023814	ENSSSCG00000023690	PTMA	GL894918.2:6122-7597	3470.64	6600.45	-0.927364	0.0002	0.003754	3140.35	6600.45	-1.07164	5e-05	0.00119245
ENSSSCT00000014851	ENSSSCG00000013597	RPS28	chr2:71320355-71321505	2588.36	4351.21	-0.74938	0.0063	0.051888	3172.77	4351.21	-0.455675	0.09595	0.336617
ENSSSCT00000001233	ENSSSCG00000001137	HIST1H1D	chr7:22072660-22073328	1947.03	3657.89	-0.909736	0.00445	0.0402804	1685.64	3657.89	-1.11772	0.0006	0.00895758
ENSSSCT00000035227	ENSSSCG00000030731	TMP-SLA-2	chr7:24603747-24604965	5220.81	2658.24	0.973802	0.00065	0.00953497	4777.54	2658.24	0.845795	0.0039	0.0367092
ENSSSCT00000018550	ENSSSCG00000017037	FABP6	chr16:68721295-68727368	7275.67	2561.99	1.50581	5e-05	0.00119245	8330.76	2561.99	1.70118	5e-05	0.00119245
ENSSSCT00000012340	ENSSSCG00000011272	RPL14	chr13:27103065-27106541	1441.96	2192.59	-0.604605	0.03215	0.164667	1837.16	2192.59	-0.255155	0.3666	0.711074
ENSSSCT00000004616	ENSSSCG00000004177	RPS12	chr1:34439082-34441686	4142.19	2054.14	1.01186	0.00015	0.00297337	4439.3	2054.14	1.1118	0.0003	0.00520502
ENSSSCT00000024362	ENSSSCG00000027831	NOP10	chr7:86158380-86158945	555.982	1840.19	-1.72674	5e-05	0.00119245	481.721	1840.19	-1.93359	5e-05	0.00119245
ENSSSCT00000019679	ENSSSCG00000018084	ND3	chrMT:10652-10998	787.262	1807.88	-1.19938	5e-05	0.00119245	686.525	1807.88	-1.39691	5e-05	0.00119245
ENSSSCT00000001273	ENSSSCG00000026572	HIST1H2BK	chr7:23174040-23174501	436.004	1608.58	-1.88338	5e-05	0.00119245	400.818	1608.58	-2.00477	5e-05	0.00119245
ENSSSCT00000013564	ENSSSCG00000012405	RPS4X	chrX:65859100-65864948	871.511	1520.05	-0.802532	0.0171	0.106479	890.886	1520.05	-0.770811	0.02085	0.122017
ENSSSCT00000019682	ENSSSCG00000018087	ND4	chrMT:11068-12736	362.068	1503.14	-2.05365	0.0003	0.00520502	288.755	1503.14	-2.38007	5e-05	0.00119245
ENSSSCT00000026530	ENSSSCG00000021825	RPS21	chr17:69172954-69173861	2896.83	1475.77	0.973013	5e-05	0.00119245	4064.02	1475.77	1.46144	5e-05	0.00119245
ENSSSCT00000026654	ENSSSCG00000027244	SPINK1	chr2:155635124-155640264	9988.27	1467.07	2.7673	5e-05	0.00119245	19799.9	1467.07	3.75448	5e-05	0.00119245
ENSSSCT00000019689	ENSSSCG00000018094	CYTB	chrMT:15341-16481	852.358	1459.63	-0.77607	0.03155	0.162413	800.202	1459.63	-0.867165	0.01835	0.111964
ENSSSCT00000015437	ENSSSCG00000014133	RPS23	chr2:92675094-92676828	2922.91	1312.48	1.15512	5e-05	0.00119245	3274.7	1312.48	1.31907	5e-05	0.00119245
ENSSSCT00000019485	ENSSSCG00000017905	PFN1	chr12:54030937-54039462	808.654	1243.29	-0.620569	0.03135	0.161747	868.704	1243.29	-0.517227	0.07465	0.28642
ENSSSCT00000030349	ENSSSCG00000021590	RPL23	GL896426.1:60123-65158	2029.19	1186.46	0.774245	0.005	0.043935	2068.67	1186.46	0.802041	0.00445	0.0402804
ENSSSCT00000010015	ENSSSCG00000009146	RPL34	chr8:121707344-121711622	2505.01	1179.02	1.08723	5e-05	0.00119245	2881.08	1179.02	1.28902	5e-05	0.00119245
ENSSSCT00000032011	ENSSSCG00000021728	LGALS2	chr5:7795557-7811135	1968.6	1171.95	0.74825	0.00885	0.0661084	2387.65	1171.95	1.02668	0.00035	0.0058827
ENSSSCT00000019664	ENSSSCG00000018069	ND2	chrMT:5086-6130	454.191	1135.06	-1.3214	0.0004	0.00655605	377.389	1135.06	-1.58864	5e-05	0.00119245
ENSSSCT00000001609	ENSSSCG00000001453	SLA-DRA	chr7:29036551-29042147	695.435	1059.42	-0.607288	0.0378	0.183681	545.188	1059.42	-0.958451	0.0013	0.0160896
ENSSSCT00000019660	ENSSSCG00000018065	ND1	chrMT:3921-4878	287.402	1011.23	-1.81497	5e-05	0.00119245	243.443	1011.23	-2.05446	5e-05	0.00119245
ENSSSCT00000012969	ENSSSCG00000011856	RPL35A	chr13:144183621-144186429	2062.14	970.095	1.08794	5e-05	0.00119245	3480.52	970.095	1.8431	5e-05	0.00119245
ENSSSCT00000003737	ENSSSCG00000003367	RPL22	chr6:61999955-62009132	2127.88	954.667	1.15635	5e-05	0.00119245	2195.05	954.667	1.20119	5e-05	0.00119245
ENSSSCT00000000203	ENSSSCG00000000190	TUBA1B	chr5:15443376-15596598	470.739	859.809	-0.869089	0.0213	0.123823	564.418	859.809	-0.607253	0.1169	0.381228
ENSSSCT00000026717	ENSSSCG00000015363	AGR2	chr9:94843482-94855042	378.71	853.709	-1.17265	5e-05	0.00119245	574.887	853.709	-0.570466	0.03215	0.164667
ENSSSCT00000014615	ENSSSCG00000013381	RPS13	chr2:45084640-45087723	469.506	714.199	-0.605184	0.00995	0.071989	492.648	714.199	-0.535767	0.02315	0.131379
ENSSSCT00000001501	ENSSSCG00000001379	TUBB	chr7:26969701-26974207	434.057	689.418	-0.667495	0.036	0.177659	464.265	689.418	-0.570431	0.0704	0.27609
ENSSSCT00000028682	ENSSSCG00000024974	RPL13	chr6:517792-520205	1273.36	680.86	0.903213	0.00055	0.00838524	1319.42	680.86	0.954472	0.0004	0.00655605
ENSSSCT00000001334	ENSSSCG00000001231	SLA-1	chr7:24748104-24751642	1413.84	677.139	1.0621	0.00495	0.0436516	1472.93	677.139	1.12116	0.006	0.0501269
ENSSSCT00000006652	ENSSSCG00000006063	PABPC3	chr4:39134108-39152341	404.456	660.995	-0.708657	0.02095	0.122378	399.043	660.995	-0.728096	0.01835	0.111964
ENSSSCT00000011746	ENSSSCG00000010734	OAT	chr14:145318779-145341081	1170.8	657.519	0.832389	0.0137	0.0905414	849.677	657.519	0.369882	0.25225	0.590586
ENSSSCT00000035556	ENSSSCG00000030849	RPL39	chrX:113430784-113434238	1244.64	654.4	0.927485	0.0014	0.0169856	1400.91	654.4	1.09812	0.00025	0.00449095
ENSSSCT00000034599	ENSSSCG00000030921	APOA1	chr9:49288614-49290784	2226.5	650.05	1.77616	0.028	0.149865	2797.96	650.05	2.10575	0.00925	0.0684333
ENSSSCT00000005170	ENSSSCG00000004682	B2M	chr1:141532504-141538781	1403.5	557.665	1.33156	5e-05	0.00119245	1321.37	557.665	1.24457	5e-05	0.00119245
ENSSSCT00000004390	ENSSSCG00000003969	GUCA2A	chr6:156476367-156478316	266.593	529.796	-0.990798	5e-05	0.00119245	332.67	529.796	-0.671346	0.0036	0.0345772
ENSSSCT00000027316	ENSSSCG00000027573	RPL29	chr13:37315972-37318756	784.778	505.307	0.635125	0.01695	0.105751	963.988	505.307	0.931856	0.00075	0.0106787
ENSSSCT00000006602	ENSSSCG00000006016	EIF3H	chr4:23327996-23448887	323.254	503.49	-0.639295	0.0075	0.0586606	307.242	503.49	-0.712586	0.0018	0.0205452
ENSSSCT00000033645	ENSSSCG00000020830	NACA	chr5:23718923-23752045	753.917	481.538	0.646758	0.0103	0.073754	752.105	481.538	0.643286	0.01095	0.077097
ENSSSCT00000014845	ENSSSCG00000013593	CCL25	chr2:71575447-71578911	783.798	450.6	0.798635	0.00145	0.017463	859.203	450.6	0.931153	5e-05	0.00119245
ENSSSCT00000002743	ENSSSCG00000002471	ISG12(A)	chr7:122215477-122220545	1715.66	444.789	1.94757	5e-05	0.00119245	2180.66	444.789	2.29357	5e-05	0.00119245
ENSSSCT00000017459	ENSSSCG00000016034	COL3A1	chr15:104067017-104105776	855.521	425.772	1.00672	0.00925	0.0684333	851.002	425.772	0.99908	0.01595	0.101159
ENSSSCT00000005572	ENSSSCG00000005055	LGALS3	chr1:204956630-204974124	735.958	417.109	0.8192	0.02665	0.14466	809.217	417.109	0.956103	0.01345	0.0893785
ENSSSCT00000002998	ENSSSCG00000002704	KARS	chr6:11900775-11914646	252.299	407.521	-0.69174	0.00625	0.0515691	234.135	407.521	-0.799532	0.00205	0.02262
ENSSSCT00000010854	ENSSSCG00000009904	DYNLL1	chr14:42956561-42958960	194.607	406.868	-1.064	5e-05	0.00119245	242.429	406.868	-0.746996	0.0006	0.00895758
ENSSSCT00000014662	ENSSSCG00000013418	CFD	chr2:77485871-77487847	733.291	403.578	0.861537	0.00045	0.00719494	852.67	403.578	1.07914	5e-05	0.00119245
ENSSSCT00000004000	ENSSSCG00000003605	PTP4A2	chr6:82337829-82348373	221.373	387.459	-0.807561	0.00015	0.00297337	210.359	387.459	-0.881188	5e-05	0.00119245
ENSSSCT00000009079	ENSSSCG00000008290	MOB1A	chr3:71982458-71992823	200.117	347.643	-0.796759	0.0001	0.00214362	203	347.643	-0.776125	0.00035	0.0058827
ENSSSCT00000001329	ENSSSCG00000001229	TMP-CH242-74M17.2	chr7:24683604-24687412	959.409	341.22	1.49144	0.00125	0.015631	783.539	341.22	1.1993	0.0114	0.0793832
ENSSSCT00000034539	ENSSSCG00000023443	REG3G	chr3:68078690-68081405	91.6906	333.11	-1.86115	5e-05	0.00119245	230.041	333.11	-0.53411	0.2024	0.525266
ENSSSCT00000022584	ENSSSCG00000022080	RHOA	chr13:35149493-35160523	193.136	327.158	-0.760366	0.00105	0.0137227	186.145	327.158	-0.813561	0.0004	0.00655605
ENSSSCT00000001457	ENSSSCG00000001341	SLA-11	chr7:26674361-26684664	516.093	323.858	0.672268	0.03445	0.172498	420.266	323.858	0.375939	0.1594	0.458983
ENSSSCT00000012189	ENSSSCG00000011137	GDI2	chr10:71276380-71312192	194.236	313.58	-0.69102	0.00695	0.0556722	193.115	313.58	-0.699371	0.0067	0.0542606
ENSSSCT00000030780	ENSSSCG00000027358	RPS17	chr7:57871569-57875631	563.237	313.191	0.846699	0.001	0.013215	608.119	313.191	0.957311	0.00055	0.00838524
ENSSSCT00000012915	ENSSSCG00000011803	EIF4A2	chr13:133973436-133994801	481.606	311.019	0.630849	0.02105	0.12285	476.079	311.019	0.614199	0.02785	0.149324
ENSSSCT00000005521	ENSSSCG00000005005	RPL36A	chr1:199863016-199864201	580.432	309.179	0.908684	5e-05	0.00119245	516.929	309.179	0.741524	0.0004	0.00655605
ENSSSCT00000019023	ENSSSCG00000017473	TOP2A	chr12:22310213-22337485	168.571	305.875	-0.859585	0.0068	0.054876	158.102	305.875	-0.952087	0.00265	0.0273669
ENSSSCT00000017637	ENSSSCG00000016196	VIL1	chr15:133479158-133507423	467.362	300.868	0.63541	0.02275	0.129719	532.594	300.868	0.823906	0.0025	0.0262156
ENSSSCT00000013802	ENSSSCG00000012623	SLC25A6	chrX:113743300-113746206	472.911	295.772	0.677086	0.00545	0.0467215	461.278	295.772	0.641152	0.00625	0.0515691
ENSSSCT00000000970	ENSSSCG00000000886	SLC25A3	chr5:89607356-89615244	493.969	293.873	0.749229	0.0024	0.0254043	502.151	293.873	0.772929	0.00175	0.0201145
ENSSSCT00000030558	ENSSSCG00000023331	UBL5	chr2:68933922-68935737	175.809	289.686	-0.720485	0.0004	0.00655605	185.094	289.686	-0.646231	0.00175	0.0201145
ENSSSCT00000004950	ENSSSCG00000004480	COX7A2	chr1:101726687-101890065	599.616	282.636	1.08509	0.01005	0.0724749	666.561	282.636	1.23779	0.0046	0.0412761
ENSSSCT00000034669	ENSSSCG00000001769	MORF4L1	chr7:53588317-53613979	179.747	279.697	-0.637899	0.0085	0.0643504	181.401	279.697	-0.624685	0.0096	0.0702912
ENSSSCT00000035439	ENSSSCG00000030957	NFKB1	chr8:127655428-127664001	168.162	278.469	-0.727664	0.0315	0.162221	48.412	278.469	-2.52408	5e-05	0.00119245
ENSSSCT00000001170	ENSSSCG00000001075	DEK	chr7:14644828-14676910	168.548	276.458	-0.713896	0.00215	0.0234086	143.698	276.458	-0.944018	0.00015	0.00297337
ENSSSCT00000008995	ENSSSCG00000008214	FABP1	chr3:60577394-60679564	887.016	267.85	1.72753	5e-05	0.00119245	1234.27	267.85	2.20416	5e-05	0.00119245
ENSSSCT00000009413	ENSSSCG00000008602	LAPTM4A	chr3:126183575-126201158	159.59	266.517	-0.739858	0.0013	0.0160896	150.978	266.517	-0.819888	0.00035	0.0058827
ENSSSCT00000012768	ENSSSCG00000011663	RBP2	chr13:87988025-88013150	689.366	263.012	1.39014	5e-05	0.00119245	531.172	263.012	1.01405	5e-05	0.00119245
ENSSSCT00000011049	ENSSSCG00000010088	UBE2L3	chr14:53717668-53765926	147.237	252.761	-0.779633	0.0003	0.00520502	150.15	252.761	-0.751367	0.0004	0.00655605
ENSSSCT00000012813	ENSSSCG00000011703	TM4SF4	chr13:97705018-97729210	429.641	248.324	0.790907	0.00035	0.0058827	670.948	248.324	1.43398	5e-05	0.00119245
ENSSSCT00000007964	ENSSSCG00000007279	DYNLRB1	chr17:43121868-43139869	129.219	246.883	-0.934006	5e-05	0.00119245	126.549	246.883	-0.96413	5e-05	0.00119245
ENSSSCT00000010091	ENSSSCG00000009216	SPP1	chr8:140307937-140315415	133.788	246.247	-0.880161	0.0017	0.0196705	232.082	246.247	-0.0854736	0.75235	0.939421
ENSSSCT00000026814	ENSSSCG00000025034	LAPTM5	chr6:81070176-81095159	141.659	245.862	-0.79543	0.00015	0.00297337	114.194	245.862	-1.10637	5e-05	0.00119245
ENSSSCT00000029311	ENSSSCG00000022820	VAMP8	chr3:62248968-62254204	393.39	231.781	0.763199	0.00065	0.00953497	415.955	231.781	0.843666	0.0003	0.00520502
ENSSSCT00000008085	ENSSSCG00000007387	PI3	chr17:53140553-53142571	423.494	229.53	0.883657	5e-05	0.00119245	709.481	229.53	1.62808	5e-05	0.00119245
ENSSSCT00000009320	ENSSSCG00000008516	DPY30	chr3:114427337-114440320	108.908	214.481	-0.977741	5e-05	0.00119245	103.321	214.481	-1.05371	5e-05	0.00119245
ENSSSCT00000004049	ENSSSCG00000003653	NDUFS5	chr6:87962940-87969007	322.727	214.393	0.590053	0.0038	0.035985	371.853	214.393	0.794471	0.00015	0.00297337
ENSSSCT00000031506	ENSSSCG00000024550	UQCR10	chr14:49817569-49820402	343.594	207.336	0.728736	0.00045	0.00719494	423.588	207.336	1.03069	5e-05	0.00119245
ENSSSCT00000012996	ENSSSCG00000011880	EAF2	chr13:148265681-148308649	109.583	206.179	-0.911873	5e-05	0.00119245	104.596	206.179	-0.979076	5e-05	0.00119245
ENSSSCT00000000292	ENSSSCG00000000273	PRR13	chr5:19096967-19101645	315.86	200.837	0.653261	0.00725	0.0572935	307.504	200.837	0.614583	0.01055	0.0750904
ENSSSCT00000017714	ENSSSCG00000016267	ITM2C	chr15:145293290-145307234	424.112	192.393	1.14039	5e-05	0.00119245	436.308	192.393	1.18129	5e-05	0.00119245
ENSSSCT00000017306	ENSSSCG00000015894	DPP4	chr15:76152547-76235571	288.474	190.543	0.598322	0.03015	0.157525	293.599	190.543	0.623725	0.0228	0.129888
ENSSSCT00000023319	ENSSSCG00000021812	MS4A1	chr2:10774612-10878566	79.4699	190.293	-1.25974	5e-05	0.00119245	67.1215	190.293	-1.50337	5e-05	0.00119245
ENSSSCT00000006012	ENSSSCG00000005466	PTBP3	chr1:283777344-283841882	106.645	188.094	-0.818632	0.00025	0.00449095	97.2107	188.094	-0.952267	5e-05	0.00119245
ENSSSCT00000029514	ENSSSCG00000021355	SOD1	chr13:205620985-205629933	309.557	186.38	0.731958	0.0006	0.00895758	348.88	186.38	0.904485	0.00015	0.00297337
ENSSSCT00000016380	ENSSSCG00000015016	POU2AF1	chr9:43861485-43866162	107.291	185.439	-0.789421	0.00055	0.00838524	115.818	185.439	-0.679088	0.0025	0.0262156
ENSSSCT00000018190	ENSSSCG00000016709	SNX10	chr18:50840314-50858704	76.666	184.263	-1.2651	5e-05	0.00119245	72.9193	184.263	-1.33739	5e-05	0.00119245
ENSSSCT00000012428	ENSSSCG00000011351	TMA7	chr13:34418061-34420816	319.091	182.016	0.809908	0.0001	0.00214362	400.953	182.016	1.13937	5e-05	0.00119245
ENSSSCT00000012477	ENSSSCG00000011399	GNAI2	chr13:35891301-35911741	114.792	178.207	-0.634533	0.00505	0.0442407	105.722	178.207	-0.753279	0.0008	0.0111573
ENSSSCT00000012820	ENSSSCG00000011710	EIF2A	chr13:98845700-98862686	90.3219	176.203	-0.964094	5e-05	0.00119245	82.11	176.203	-1.10161	5e-05	0.00119245
ENSSSCT00000011350	ENSSSCG00000010368	GLUD1	chr14:95361080-95397604	285.61	171.151	0.738775	0.00365	0.0349368	263.296	171.151	0.621417	0.0133	0.0886948
ENSSSCT00000019150	ENSSSCG00000017591	NME2	chr12:27507398-27513382	372.475	169.081	1.13943	5e-05	0.00119245	459.616	169.081	1.44271	5e-05	0.00119245
ENSSSCT00000028144	ENSSSCG00000021971	DPEP1	chr6:487985-493066	292.667	165.978	0.818267	0.0034	0.0332197	374.866	165.978	1.17538	5e-05	0.00119245
ENSSSCT00000016439	ENSSSCG00000015073	TAGLN	chr9:49631071-49636680	481.786	165.238	1.54385	5e-05	0.00119245	322.771	165.238	0.96597	0.0028	0.0285611
ENSSSCT00000007257	ENSSSCG00000006623	PSMB4	chr4:107036321-107038687	269.169	164.989	0.706148	0.00125	0.015631	272.253	164.989	0.722585	0.0007	0.010104
ENSSSCT00000007115	ENSSSCG00000006496	LMNA	chr4:102642365-102661829	260.735	164.75	0.662302	0.0056	0.0476499	286.539	164.75	0.798454	0.0012	0.0151808
ENSSSCT00000006661	ENSSSCG00000006070	COX6C	chr4:39990793-40005773	575.119	163.259	1.8167	5e-05	0.00119245	655.285	163.259	2.00496	5e-05	0.00119245
ENSSSCT00000031093	ENSSSCG00000026606	PAIP2	chr2:147068042-147107049	101.244	162.432	-0.681998	0.00885	0.0661084	96.2165	162.432	-0.755484	0.00545	0.0467215
ENSSSCT00000009844	ENSSSCG00000008987	CCNI	chr8:76887183-76919478	95.909	157.428	-0.714949	0.00145	0.017463	84.8295	157.428	-0.892049	0.0001	0.00214362
ENSSSCT00000031493	ENSSSCG00000022879	KDELR2	GL893800.1:7574-15665	68.3621	156.75	-1.1972	5e-05	0.00119245	70.278	156.75	-1.15732	5e-05	0.00119245
ENSSSCT00000019098	ENSSSCG00000017544	ATP5G1	chr12:25066818-25069489	303.77	155.63	0.964857	5e-05	0.00119245	433.789	155.63	1.47887	5e-05	0.00119245
ENSSSCT00000016202	ENSSSCG00000014850	SPCS2	chr9:10372444-10397242	85.394	153.122	-0.842473	5e-05	0.00119245	83.0858	153.122	-0.882006	5e-05	0.00119245
ENSSSCT00000000649	ENSSSCG00000000604	ARHGDIB	chr5:60965350-60987579	69.088	152.16	-1.13908	5e-05	0.00119245	65.6288	152.16	-1.21319	5e-05	0.00119245
ENSSSCT00000016434	ENSSSCG00000015068	APOA4	chr9:49273814-49276432	328.161	150.352	1.12606	5e-05	0.00119245	842.661	150.352	2.48661	5e-05	0.00119245
ENSSSCT00000031806	ENSSSCG00000021560	UBE2I	chr3:41959477-41966997	64.3736	148.892	-1.20973	5e-05	0.00119245	74.5473	148.892	-0.998041	5e-05	0.00119245
ENSSSCT00000008489	ENSSSCG00000007743	CHCHD2	chr3:17064653-17071903	307.338	147.288	1.06118	5e-05	0.00119245	387.928	147.288	1.39715	5e-05	0.00119245
ENSSSCT00000013443	ENSSSCG00000012294	PLP2	chrX:48063313-48066260	83.6755	145.415	-0.797298	5e-05	0.00119245	78.722	145.415	-0.885335	5e-05	0.00119245
ENSSSCT00000006542	ENSSSCG00000005959	FAM49B	chr4:10801065-10859545	90.6434	142.912	-0.656857	0.0023	0.0246104	84.6978	142.912	-0.754735	0.0008	0.0111573
ENSSSCT00000016435	ENSSSCG00000015069	APOC3	chr9:49283445-49285806	256.032	140.421	0.86657	0.0013	0.0160896	348.728	140.421	1.31235	5e-05	0.00119245
ENSSSCT00000023437	ENSSSCG00000023489	CXCL9	chr8:75801203-75806186	82.1349	139.367	-0.762825	0.00485	0.0429592	30.6274	139.367	-2.186	5e-05	0.00119245
ENSSSCT00000000383	ENSSSCG00000000361	CD63	chr5:22652126-22656079	353.344	138.861	1.34743	5e-05	0.00119245	320.879	138.861	1.20838	5e-05	0.00119245
ENSSSCT00000031057	ENSSSCG00000029226	UBC	chr14:29959862-29961464	216.151	135.717	0.671441	0.0029	0.0293426	229.946	135.717	0.760698	0.0006	0.00895758
ENSSSCT00000016950	ENSSSCG00000015560	ARPC5	chr9:137168060-137178358	207.423	134.702	0.622805	0.00725	0.0572935	198.802	134.702	0.561558	0.01365	0.0903323
ENSSSCT00000017244	ENSSSCG00000015836	HNRNPA2B1	chr15:59810833-59811895	207.902	131.551	0.660278	0.002	0.0222139	167.783	131.551	0.350968	0.08805	0.319101
ENSSSCT00000005002	ENSSSCG00000004528	MBD2	chr1:113952130-114064057	70.4904	131.356	-0.897979	5e-05	0.00119245	66.9943	131.356	-0.971367	5e-05	0.00119245
ENSSSCT00000012642	ENSSSCG00000011552	ARPC4	chr13:73159044-73164638	286.48	130.718	1.13198	5e-05	0.00119245	295.611	130.718	1.17725	5e-05	0.00119245
ENSSSCT00000004935	ENSSSCG00000004468	SH3BGRL2	chr1:97174853-97176328	42.5838	128.903	-1.59791	0.0162	0.102359	52.34	128.903	-1.3003	0.1927	0.51055
ENSSSCT00000009083	ENSSSCG00000008294	ACTG2	chr3:72251855-72310387	600.686	128.899	2.22037	5e-05	0.00119245	302.434	128.899	1.23038	0.0028	0.0285611
ENSSSCT00000025147	ENSSSCG00000021411	HIST1H2BD	chr7:22044566-22052982	241.812	127.548	0.922841	0.0001	0.00214362	353.117	127.548	1.4691	5e-05	0.00119245
ENSSSCT00000006915	ENSSSCG00000006309	CD247	chr4:91170081-91259490	56.0674	127.332	-1.18336	5e-05	0.00119245	50.1183	127.332	-1.34518	5e-05	0.00119245
ENSSSCT00000036373	ENSSSCG00000012481	TSPAN6	chrX:90165030-90174389	58.5198	125.896	-1.10524	5e-05	0.00119245	49.7498	125.896	-1.33947	5e-05	0.00119245
ENSSSCT00000004602	ENSSSCG00000004163	BCLAF1	chr1:31490842-31513300	82.0882	125.517	-0.61263	0.01385	0.0912218	67.4062	125.517	-0.896924	0.00065	0.00953497
ENSSSCT00000031590	ENSSSCG00000030149	CAPNS1	chr6:40913604-40920797	75.0505	124.703	-0.732566	0.0004	0.00655605	80.1191	124.703	-0.638281	0.00235	0.0250032
ENSSSCT00000017392	ENSSSCG00000015973	ATP5G3	chr15:90317365-90321215	247.268	124.418	0.990884	5e-05	0.00119245	276.698	124.418	1.15312	5e-05	0.00119245
ENSSSCT00000005307	ENSSSCG00000004808	GREM1	chr1:152745850-152746405	53.9482	124.121	-1.2021	5e-05	0.00119245	47.0701	124.121	-1.39887	5e-05	0.00119245
ENSSSCT00000019232	ENSSSCG00000017668	VMP1	chr12:37208394-37342001	63.9172	122.921	-0.943457	0.00015	0.00297337	59.4988	122.921	-1.0468	5e-05	0.00119245
ENSSSCT00000015612	ENSSSCG00000014289	UQCRQ	chr2:140654980-140656749	190.459	122.181	0.640469	0.0016	0.018837	242.446	122.181	0.988651	5e-05	0.00119245
ENSSSCT00000024075	ENSSSCG00000027918	STAT1	chr15:106888872-106901999	56.8302	121.548	-1.0968	5e-05	0.00119245	40.4102	121.548	-1.58874	5e-05	0.00119245
ENSSSCT00000000131	ENSSSCG00000000125	LGALS1	chr5:7642311-7646221	206.82	120.664	0.777387	0.0005	0.00778241	188.313	120.664	0.642144	0.003	0.0300926
ENSSSCT00000019113	ENSSSCG00000017558	TOB1	chr12:27309995-27311036	77.4248	119.709	-0.628665	0.00235	0.0250032	73.4416	119.709	-0.704863	0.00035	0.0058827
ENSSSCT00000035960	ENSSSCG00000002981	DMBT1	chr6:43728924-43753137	61.252	119.691	-0.966486	0.0029	0.0293426	98.6048	119.691	-0.279586	0.33325	0.679271
ENSSSCT00000000958	ENSSSCG00000000875	NR1H4	chr5:87784469-87828141	212.892	118.752	0.842174	0.0013	0.0160896	222.12	118.752	0.903387	0.0001	0.00214362
ENSSSCT00000036211	ENSSSCG00000024568	CH242-80G20.1	chr6:46102443-46115835	19.4121	114.905	-2.56541	5e-05	0.00119245	43.3754	114.905	-1.40549	5e-05	0.00119245
ENSSSCT00000023042	ENSSSCG00000025379	CTDSP2	GL895994.1:35181-41774	173.493	114.054	0.605156	0.00275	0.0281588	170.387	114.054	0.57909	0.00365	0.0349368
ENSSSCT00000016280	ENSSSCG00000014924	CTSC	chr9:24081770-24116601	61.5468	111.721	-0.860149	0.00025	0.00449095	64.7269	111.721	-0.787467	0.00085	0.0116991
ENSSSCT00000015545	ENSSSCG00000014227	TNFAIP8	chr2:128722080-128722647	64.9627	111.533	-0.779787	0.0005	0.00778241	64.1629	111.533	-0.797658	0.0004	0.00655605
ENSSSCT00000011036	ENSSSCG00000010075	VPREB3	chr14:53368926-53371894	66.7687	110.657	-0.728851	0.00165	0.0192591	87.0863	110.657	-0.345576	0.12205	0.391656
ENSSSCT00000027054	ENSSSCG00000021443	SGK1	chr1:33250474-33256209	169.211	109.956	0.621897	0.0108	0.0762843	174.933	109.956	0.669877	0.00475	0.0422547
ENSSSCT00000017692	ENSSSCG00000016248	AGFG1	chr15:142743867-142774381	70.7681	108.39	-0.615058	0.00345	0.0335647	78.1854	108.39	-0.47126	0.0239	0.134254
ENSSSCT00000015485	ENSSSCG00000014173	LNPEP	chr2:107369917-107462862	66.2395	107.647	-0.700548	0.00305	0.0305033	70.6297	107.647	-0.607963	0.01025	0.0734947
ENSSSCT00000004173	ENSSSCG00000003771	FUBP1	chr6:125463271-125495775	67.826	107.467	-0.663989	0.0025	0.0262156	66.656	107.467	-0.689093	0.00195	0.0218749
ENSSSCT00000026104	ENSSSCG00000026393	MRPS15	GL895950.1:18101-24790	57.7351	107.084	-0.891225	5e-05	0.00119245	55.8694	107.084	-0.938617	5e-05	0.00119245
ENSSSCT00000005109	ENSSSCG00000004626	TMOD3	chr1:132955317-133000013	59.618	106.96	-0.84325	5e-05	0.00119245	57.4412	106.96	-0.896913	5e-05	0.00119245
ENSSSCT00000019213	ENSSSCG00000017649	SKA2	chr12:37094023-37108508	60.6028	106.673	-0.815743	0.0017	0.0196705	60.6159	106.673	-0.815431	0.00185	0.0209924
ENSSSCT00000018119	ENSSSCG00000016641	LINC00998	chr18:35200926-35201106	312.867	106.349	1.55675	0.0352	0.174912	243.63	106.349	1.19589	0.0898	0.322883
ENSSSCT00000005545	ENSSSCG00000005029	C14orf166	chr1:201953124-201970820	163.839	105.8	0.630942	0.00195	0.0218749	166.128	105.8	0.650963	0.00155	0.0183734
ENSSSCT00000027931	ENSSSCG00000024316	COX5A	chr7:63312036-63332455	181.263	105.686	0.778309	0.0001	0.00214362	203.89	105.686	0.948014	5e-05	0.00119245
ENSSSCT00000009461	ENSSSCG00000008648	RSAD2	chr3:137667911-137683557	264.708	105.44	1.32798	0.00145	0.017463	404.554	105.44	1.93991	5e-05	0.00119245
ENSSSCT00000005650	ENSSSCG00000005125	LRRC19	chr1:218533044-218618046	181.629	105.395	0.785191	0.0024	0.0254043	126.536	105.395	0.263749	0.2563	0.595004
ENSSSCT00000018792	ENSSSCG00000017263	GNA13	chr12:12386614-12443043	58.361	104.094	-0.834806	0.0001	0.00214362	67.36	104.094	-0.627919	0.002	0.0222139
ENSSSCT00000014042	ENSSSCG00000012847	TALDO1	chr2:201531-209654	179.34	103.826	0.788535	0.0003	0.00520502	200.257	103.826	0.947689	5e-05	0.00119245
ENSSSCT00000034013	ENSSSCG00000016916	IL6ST	chr16:37476139-37522640	68.2728	103.632	-0.602089	0.0086	0.0649308	59.8106	103.632	-0.792998	0.00065	0.00953497
ENSSSCT00000008664	ENSSSCG00000007907	USP7	chr3:34686455-34742973	57.0313	103.325	-0.857359	0.00035	0.0058827	58.7274	103.325	-0.815078	0.0007	0.010104
ENSSSCT00000011808	ENSSSCG00000010792	PRAP1	chr14:153794852-153798758	580.364	103.175	2.49186	5e-05	0.00119245	592.791	103.175	2.52242	5e-05	0.00119245
ENSSSCT00000010858	ENSSSCG00000009908	TRIAP1	chr14:42880017-42881422	246.401	102.788	1.26134	5e-05	0.00119245	315.799	102.788	1.61934	5e-05	0.00119245
ENSSSCT00000012304	ENSSSCG00000011237	PDCD6IP	chr13:21193214-21240142	65.2689	102.152	-0.646245	0.00215	0.0234086	68.84	102.152	-0.569393	0.0068	0.054876
ENSSSCT00000027948	ENSSSCG00000002505	PAPOLA	chr7:124934752-124999369	65.6268	100.973	-0.621609	0.02735	0.147261	63.4075	100.973	-0.671242	0.01835	0.111964
ENSSSCT00000003418	ENSSSCG00000003080	IGSF23	chr6:47050121-47057994	229.416	100.653	1.18858	5e-05	0.00119245	236.241	100.653	1.23087	5e-05	0.00119245
ENSSSCT00000012712	ENSSSCG00000011615	RAB7A	chr13:79450126-79456616	46.4854	100.652	-1.11453	5e-05	0.00119245	46.7827	100.652	-1.10533	5e-05	0.00119245
ENSSSCT00000034495	ENSSSCG00000010453	IFIT1	chr14:110223575-110235651	304.906	99.9487	1.6091	0.00085	0.0116991	275.932	99.9487	1.46506	0.00015	0.00297337
ENSSSCT00000013277	ENSSSCG00000012138	ACE2	chrX:13060433-13089851	161.571	99.0001	0.706665	0.002	0.0222139	227.653	99.0001	1.20133	5e-05	0.00119245
ENSSSCT00000019236	ENSSSCG00000017672	MED13	chr12:37666520-37736693	62.0045	98.3826	-0.66603	0.005	0.043935	58.615	98.3826	-0.747134	0.0016	0.018837
ENSSSCT00000008386	ENSSSCG00000007646	LAMTOR4	chr3:7364229-7366880	198.847	98.2615	1.01696	5e-05	0.00119245	187.868	98.2615	0.935023	5e-05	0.00119245
ENSSSCT00000003880	ENSSSCG00000003493	CAPZB	chr6:71842814-71985441	47.5356	98.0442	-1.04442	5e-05	0.00119245	46.9869	98.0442	-1.06117	5e-05	0.00119245
ENSSSCT00000026313	ENSSSCG00000022234	TOMM6	chr7:42386236-42387203	245.459	97.5085	1.33189	0.0009	0.0122346	346.458	97.5085	1.82908	5e-05	0.00119245
ENSSSCT00000016699	ENSSSCG00000015326	COL1A2	chr9:81357191-81393120	148.463	96.67	0.61896	0.01745	0.108028	148.372	96.67	0.618081	0.0265	0.144054
ENSSSCT00000029549	ENSSSCG00000026807	NDUFB4	JH118974.1:260144-266478	181.96	96.6671	0.912525	5e-05	0.00119245	196.093	96.6671	1.02044	5e-05	0.00119245
ENSSSCT00000034424	ENSSSCG00000021967	SYK	chr14:2849306-2853767	64.1673	96.2552	-0.585027	0.0412	0.194558	68.2306	96.2552	-0.496446	0.0908	0.325127
ENSSSCT00000016601	ENSSSCG00000015235	ETS1	chr9:61508891-61540092	63.4499	95.4827	-0.589622	0.0042	0.038713	58.2464	95.4827	-0.713069	0.00045	0.00719494
ENSSSCT00000029818	ENSSSCG00000023112	PDS5A	chr8:32680011-32803323	54.836	95.0157	-0.793043	0.0006	0.00895758	56.2663	95.0157	-0.755893	0.0009	0.0122346
ENSSSCT00000013522	ENSSSCG00000012365	MSN	chrX:58532139-58596671	58.1491	93.8904	-0.691221	0.002	0.0222139	52.3991	93.8904	-0.841435	5e-05	0.00119245
ENSSSCT00000008126	ENSSSCG00000007423	UBE2C	chr17:53664232-53667596	45.7175	93.6073	-1.03388	5e-05	0.00119245	47.3204	93.6073	-0.98416	5e-05	0.00119245
ENSSSCT00000017481	ENSSSCG00000016056	GLS	chr15:106832341-106866674	173.692	93.6006	0.891945	0.00045	0.00719494	150.602	93.6006	0.686151	0.01505	0.0969793
ENSSSCT00000005381	ENSSSCG00000004875	CYB5A	chr1:165902017-165937614	150.513	92.8945	0.696224	0.00165	0.0192591	140.533	92.8945	0.597239	0.00575	0.0485518
ENSSSCT00000009846	ENSSSCG00000008989	CNOT6L	chr8:77394689-77455394	55.0398	92.8228	-0.754006	0.0004	0.00655605	52.6883	92.8228	-0.816998	0.00015	0.00297337
ENSSSCT00000002794	ENSSSCG00000002516	WARS	chr7:128677826-128702925	61.447	92.6608	-0.592616	0.0167	0.104722	51.6071	92.6608	-0.84439	0.00105	0.0137227
ENSSSCT00000029778	ENSSSCG00000020903	NUDT4	chr5:93642862-93657312	59.9817	92.5214	-0.625264	0.0054	0.0464359	58.7405	92.5214	-0.655431	0.0037	0.0352729
ENSSSCT00000011042	ENSSSCG00000010081	MAPK1	chr14:53590166-53614842	26.7106	92.3744	-1.79008	0.0205	0.120664	17.6584	92.3744	-2.38714	5e-05	0.00119245
ENSSSCT00000018220	ENSSSCG00000016738	H2AFZ	chr18:55305334-55314890	140.564	91.8733	0.613507	0.00505	0.0442407	147.395	91.8733	0.681975	0.0016	0.018837
ENSSSCT00000007757	ENSSSCG00000007085	DSTN	chr17:29448865-29455861	174.52	90.7503	0.943422	5e-05	0.00119245	151.547	90.7503	0.739793	0.0007	0.010104
ENSSSCT00000001634	ENSSSCG00000001470	HLA-DMA	chr7:29500106-29504539	42.955	90.6638	-1.0777	5e-05	0.00119245	34.7896	90.6638	-1.38187	5e-05	0.00119245
ENSSSCT00000017568	ENSSSCG00000016135	CPO	chr15:121719667-121748610	140.683	90.6115	0.634687	0.0052	0.0451959	132.517	90.6115	0.54841	0.0152	0.0977392
ENSSSCT00000019121	ENSSSCG00000017566	ACSF2	chr12:26802624-26841148	173.678	89.4896	0.956621	5e-05	0.00119245	159.52	89.4896	0.833941	0.00015	0.00297337
ENSSSCT00000030728	ENSSSCG00000029362	CHMP2A	GL895345.1:57-843	186.591	89.4354	1.06096	5e-05	0.00119245	174.458	89.4354	0.963961	5e-05	0.00119245
ENSSSCT00000014686	ENSSSCG00000013442	ABHD17A	chr2:77148846-77157359	139.485	89.2892	0.643557	0.00195	0.0218749	148.764	89.2892	0.736468	0.0005	0.00778241
ENSSSCT00000019534	ENSSSCG00000017950	TP53	chr12:55220417-55234675	57.7784	89.0769	-0.624521	0.00305	0.0305033	56.1466	89.0769	-0.665852	0.00165	0.0192591
ENSSSCT00000007481	ENSSSCG00000006830	PSMA5	chr4:121153781-121226070	146.466	89.0644	0.717648	0.00075	0.0106787	173.311	89.0644	0.960442	5e-05	0.00119245
ENSSSCT00000029764	ENSSSCG00000027982	ISG15	GL895967.2:58448-59139	188.201	89.0275	1.07995	0.00015	0.00297337	165.022	89.0275	0.890333	0.0008	0.0111573
ENSSSCT00000000035	ENSSSCG00000000033	TSPO	chr5:3145791-3157669	140.399	88.3343	0.668491	0.00165	0.0192591	175.383	88.3343	0.98946	5e-05	0.00119245
ENSSSCT00000023998	ENSSSCG00000021472	POLR2E	chr2:77655740-77666785	159.285	87.8387	0.85868	5e-05	0.00119245	175.851	87.8387	1.00142	5e-05	0.00119245
ENSSSCT00000023057	ENSSSCG00000023562	SNRPE	chr9:70909004-70915566	264.552	87.7861	1.59148	5e-05	0.00119245	301.208	87.7861	1.7787	5e-05	0.00119245
ENSSSCT00000019495	ENSSSCG00000017913	PSMB6	chr12:54317036-54319097	144.486	87.5359	0.722982	0.0001	0.00214362	156.81	87.5359	0.841068	5e-05	0.00119245
ENSSSCT00000013051	ENSSSCG00000011927	UBE2B	chr13:156760855-156761673	53.1354	86.719	-0.706675	0.00015	0.00297337	54.2473	86.719	-0.676797	0.0009	0.0122346
ENSSSCT00000031712	ENSSSCG00000022729	KLHL6	chr13:130828812-130850584	54.8172	85.5605	-0.642316	0.01005	0.0724749	62.0957	85.5605	-0.462452	0.0601	0.24923
ENSSSCT00000019455	ENSSSCG00000017878	UBE2G1	chr12:52253238-52278046	55.9863	85.1048	-0.604165	0.00375	0.0356116	52.2715	85.1048	-0.703215	0.0008	0.0111573
ENSSSCT00000013964	ENSSSCG00000012772	BCAP31	chrX:142021545-142065526	132.95	85.0782	0.64402	0.0129	0.0866778	163.524	85.0782	0.942637	0.0005	0.00778241
ENSSSCT00000008828	ENSSSCG00000008056	ATP6V0C	chr3:42700753-42706839	51.7048	85.0678	-0.718316	0.0004	0.00655605	58.359	85.0678	-0.543658	0.00895	0.0666842
ENSSSCT00000007332	ENSSSCG00000006693	PDZK1	chr4:109267879-109318377	192.938	85.0602	1.18158	5e-05	0.00119245	187.306	85.0602	1.13884	5e-05	0.00119245
ENSSSCT00000034901	ENSSSCG00000011723	MME	chr13:103030829-103128284	145.652	84.637	0.78317	0.0104	0.0742789	139.794	84.637	0.723944	0.01345	0.0893785
ENSSSCT00000004085	ENSSSCG00000003687	EPB41L3	chr6:94749952-94835636	41.6773	84.1851	-1.0143	5e-05	0.00119245	42.5961	84.1851	-0.982842	5e-05	0.00119245
ENSSSCT00000005884	ENSSSCG00000005345	PAX5	chr1:265438441-265622096	43.3598	83.9505	-0.953181	5e-05	0.00119245	48.1055	83.9505	-0.803336	0.0002	0.003754
ENSSSCT00000006823	ENSSSCG00000006227	GGH	chr4:77278489-77303727	145.645	83.7666	0.798005	0.0018	0.0205452	143.279	83.7666	0.774384	0.00135	0.0165389
ENSSSCT00000004997	ENSSSCG00000004524	SMAD4	chr1:110509116-110563187	54.2369	83.4054	-0.620868	0.0062	0.0512756	51.6953	83.4054	-0.690108	0.00255	0.0266091
ENSSSCT00000017665	ENSSSCG00000016223	ACSL3	chr15:138663705-138712406	152.279	83.2494	0.871205	0.0004	0.00655605	152.16	83.2494	0.870074	0.00035	0.0058827
ENSSSCT00000010347	ENSSSCG00000009440	ELF1	chr11:26327365-26385565	51.9341	82.98	-0.676084	0.002	0.0222139	52.9925	82.98	-0.646976	0.00265	0.0273669
ENSSSCT00000007592	ENSSSCG00000006930	SH3GLB1	chr4:141809640-141843397	50.2932	82.232	-0.709336	0.00045	0.00719494	46.2719	82.232	-0.829564	5e-05	0.00119245
ENSSSCT00000010797	ENSSSCG00000009851	PEBP1	chr14:36684363-36691471	154.451	81.4467	0.923226	5e-05	0.00119245	163.39	81.4467	1.00439	5e-05	0.00119245
ENSSSCT00000014856	ENSSSCG00000013602	HNRNPM	chr2:71180162-71225240	132.678	80.378	0.723051	0.001	0.013215	135.036	80.378	0.74847	0.00115	0.01472
ENSSSCT00000011483	ENSSSCG00000010495	ALDH18A1	chr14:116807918-116855107	127.989	80.0406	0.67721	0.0026	0.0269681	118.508	80.0406	0.566176	0.0099	0.0718303
ENSSSCT00000003981	ENSSSCG00000003586	EPB41	chr6:79677218-79876085	49.2155	79.9007	-0.699096	0.00085	0.0116991	54.8904	79.9007	-0.541653	0.0084	0.0638047
ENSSSCT00000007289	ENSSSCG00000006652	MCL1	chr4:107809260-107811482	128.053	79.287	0.691582	0.0005	0.00778241	149.04	79.287	0.910541	5e-05	0.00119245
ENSSSCT00000014452	ENSSSCG00000013232	MTCH2	chr2:16159994-16180455	141.699	77.8158	0.864689	5e-05	0.00119245	159.5	77.8158	1.03542	5e-05	0.00119245
ENSSSCT00000014187	ENSSSCG00000012979	RNASEH2C	chr2:5666204-5676732	119.78	75.7446	0.661171	0.04135	0.195022	151.427	75.7446	0.999408	0.0028	0.0285611
ENSSSCT00000013804	ENSSSCG00000012625	PGRMC1	chrX:113925760-113933800	151.846	75.2732	1.01241	0.0001	0.00214362	140.953	75.2732	0.905007	5e-05	0.00119245
ENSSSCT00000034567	ENSSSCG00000015390	ABCB1	chr9:102544382-102626450	114.018	75.0623	0.603104	0.03915	0.188084	134.035	75.0623	0.836444	0.0042	0.038713
ENSSSCT00000033630	ENSSSCG00000030821	FCAMR	chr9:73932560-73947120	37.2572	74.7265	-1.0041	0.02335	0.132116	36.3637	74.7265	-1.03912	0.0211	0.123041
ENSSSCT00000004581	ENSSSCG00000004145	ABRACL	chr1:28570437-28585823	113.499	74.6245	0.604962	0.00475	0.0422547	108.848	74.6245	0.544598	0.0112	0.0783229
ENSSSCT00000008748	ENSSSCG00000007984	MRPL28	chr3:41094504-41097389	111.417	74.2609	0.585292	0.00425	0.0390669	126.833	74.2609	0.772252	0.00015	0.00297337
ENSSSCT00000015585	ENSSSCG00000014264	HINT1	chr2:138700891-138706953	131.219	74.1367	0.823711	0.00015	0.00297337	131.814	74.1367	0.830243	0.0007	0.010104
ENSSSCT00000001908	ENSSSCG00000001708	CDC5L	chr7:45306184-45352111	43.2067	74.0048	-0.776363	0.0004	0.00655605	37.7287	74.0048	-0.971957	5e-05	0.00119245
ENSSSCT00000013864	ENSSSCG00000012682	PHF6	chrX:126334847-126353998	37.598	73.8998	-0.974914	5e-05	0.00119245	38.4919	73.8998	-0.941015	5e-05	0.00119245
ENSSSCT00000015522	ENSSSCG00000014204	DCP2	chr2:121372092-121426086	34.6849	73.7905	-1.08913	5e-05	0.00119245	35.6303	73.7905	-1.05033	5e-05	0.00119245
ENSSSCT00000023763	ENSSSCG00000022132	SUB1	chr15:20029045-20247084	148.818	73.5991	1.01579	0.0013	0.0160896	145.957	73.5991	0.987787	0.002	0.0222139
ENSSSCT00000034952	ENSSSCG00000021334	CH242-307A4.1	chr3:67957189-67973255	32.8425	73.4291	-1.16079	0.00625	0.0515691	50.9087	73.4291	-0.528438	0.16765	0.472262
ENSSSCT00000006932	ENSSSCG00000006324	ALDH9A1	chr4:92685721-92713628	124.073	73.3115	0.759079	0.0005	0.00778241	144.648	73.3115	0.980438	5e-05	0.00119245
ENSSSCT00000010864	ENSSSCG00000009914	MLEC	chr14:43069401-43079337	109.826	72.8967	0.591295	0.00335	0.0328264	123.235	72.8967	0.757486	0.0002	0.003754
ENSSSCT00000029578	ENSSSCG00000030632	UBE2V1	chr17:57860293-57894555	34.4325	72.8572	-1.0813	5e-05	0.00119245	33.7655	72.8572	-1.10952	5e-05	0.00119245
ENSSSCT00000002695	ENSSSCG00000002426	ZC3H14	chr7:116962053-117008049	43.1127	72.6065	-0.751986	0.0003	0.00520502	42.1225	72.6065	-0.785509	0.0002	0.003754
ENSSSCT00000005912	ENSSSCG00000005372	ANP32B	chr1:268013288-268037409	35.3124	72.265	-1.03312	5e-05	0.00119245	34.3376	72.265	-1.07351	5e-05	0.00119245
ENSSSCT00000019143	ENSSSCG00000017584	PPP1R9B	chr12:26358251-26375423	45.8757	71.1139	-0.632402	0.00355	0.034246	46.9198	71.1139	-0.599935	0.0057	0.0482378
ENSSSCT00000005755	ENSSSCG00000005222	SLC1A1	chr1:243229380-243270334	121.703	70.2145	0.793526	0.0026	0.0269681	100.127	70.2145	0.51199	0.04625	0.210065
ENSSSCT00000025672	ENSSSCG00000025972	NTAN1	GL896268.1:5922-13763	41.2428	69.6736	-0.756469	0.0001	0.00214362	32.2873	69.6736	-1.10965	5e-05	0.00119245
ENSSSCT00000000821	ENSSSCG00000000757	ADIPOR2	chr5:70999570-71021751	35.9385	68.8805	-0.938566	5e-05	0.00119245	37.884	68.8805	-0.862509	5e-05	0.00119245
ENSSSCT00000017571	ENSSSCG00000016138	CREB1	chr15:122385352-122404380	37.5618	68.4215	-0.865183	5e-05	0.00119245	38.5427	68.4215	-0.827994	5e-05	0.00119245
ENSSSCT00000028838	ENSSSCG00000025182	ELK4	chr9:72566745-72581074	29.0925	68.2787	-1.23079	5e-05	0.00119245	28.1354	68.2787	-1.27905	5e-05	0.00119245
ENSSSCT00000015483	ENSSSCG00000014171	ERAP1	chr2:107133358-107167934	29.1448	68.1789	-1.22609	0.00335	0.0328264	25.8232	68.1789	-1.40066	0.00115	0.01472
ENSSSCT00000005121	ENSSSCG00000004636	TRPM7	chr1:134599617-134689679	42.8393	68.0021	-0.666643	0.00505	0.0442407	40.308	68.0021	-0.754512	0.00155	0.0183734
ENSSSCT00000032467	ENSSSCG00000022284	DUSP6	GL894700.2:52267-55482	34.9735	66.7146	-0.931739	5e-05	0.00119245	42.5184	66.7146	-0.649915	0.0012	0.0151808
ENSSSCT00000030720	ENSSSCG00000030420	GLG1	chr6:12976320-13127077	43.4338	66.5193	-0.614955	0.00525	0.045513	46.8404	66.5193	-0.50602	0.0206	0.121063
ENSSSCT00000002643	ENSSSCG00000002377	EIF2B2	chr7:104047922-104054504	43.1946	66.2818	-0.617761	0.0021	0.0230209	40.0423	66.2818	-0.727089	0.0002	0.003754
ENSSSCT00000034110	ENSSSCG00000011848	TFRC	chr13:143408459-143437991	6.53159	66.2185	-3.34173	0.0486	0.217178	5.76274	66.2185	-3.52241	0.0202	0.119425
ENSSSCT00000008169	ENSSSCG00000007465	B4GALT5	chr17:57581156-57602483	34.0909	65.7752	-0.948157	5e-05	0.00119245	32.3809	65.7752	-1.0224	5e-05	0.00119245
ENSSSCT00000010058	ENSSSCG00000009185	ADH5	chr8:130451259-130466903	109.206	65.5485	0.736414	0.00055	0.00838524	117.775	65.5485	0.845393	5e-05	0.00119245
ENSSSCT00000000291	ENSSSCG00000000272	SP1	chr5:19024787-19065851	42.508	65.4951	-0.623653	0.00265	0.0273669	41.9512	65.4951	-0.642676	0.0022	0.0238111
ENSSSCT00000033705	ENSSSCG00000012142	AP1S2	chrX:13312012-13341924	35.4064	65.2933	-0.882927	5e-05	0.00119245	33.1278	65.2933	-0.978894	5e-05	0.00119245
ENSSSCT00000005808	ENSSSCG00000005273	OSTF1	chr1:255040335-255094990	98.937	65.191	0.601838	0.00375	0.0356116	94.7165	65.191	0.538944	0.00995	0.071989
ENSSSCT00000005618	ENSSSCG00000005096	HIF1A	chr1:212130957-212179888	35.9806	65.1661	-0.856903	5e-05	0.00119245	36.6324	65.1661	-0.831001	5e-05	0.00119245
ENSSSCT00000005063	ENSSSCG00000004584	GCNT3	chr1:124393188-124394511	32.9792	64.6967	-0.972134	5e-05	0.00119245	96.0282	64.6967	0.569767	0.0076	0.0592256
ENSSSCT00000017379	ENSSSCG00000015961	CDCA7	chr15:88746847-88761828	40.5153	64.252	-0.665272	0.0024	0.0254043	46.9719	64.252	-0.451943	0.0333	0.16872
ENSSSCT00000029072	ENSSSCG00000030242	RSRP1	GL894621.1:28008-30628	35.8026	64.1864	-0.842204	0.00025	0.00449095	43.409	64.1864	-0.564275	0.01045	0.0745279
ENSSSCT00000023881	ENSSSCG00000025109	PLD3	chr6:44511246-44515794	38.453	63.9789	-0.734498	0.0004	0.00655605	36.4474	63.9789	-0.811778	0.0001	0.00214362
ENSSSCT00000004116	ENSSSCG00000003716	SS18	chr6:103686534-103752238	33.7423	63.8154	-0.919346	5e-05	0.00119245	32.2408	63.8154	-0.985014	5e-05	0.00119245
ENSSSCT00000013064	ENSSSCG00000011939	RETNLB	chr13:159846498-159847802	124.042	63.6965	0.961538	5e-05	0.00119245	128.194	63.6965	1.00904	5e-05	0.00119245
ENSSSCT00000000285	ENSSSCG00000000266	PFDN5	chr5:18948439-18952540	143.894	63.567	1.17866	5e-05	0.00119245	172.038	63.567	1.43638	5e-05	0.00119245
ENSSSCT00000024488	ENSSSCG00000022801	S100PBP	chr6:83155167-83184948	22.3239	63.529	-1.50882	5e-05	0.00119245	22.5856	63.529	-1.49201	5e-05	0.00119245
ENSSSCT00000029183	ENSSSCG00000022749	MRPL40	chr14:54670168-54672802	99.4619	63.4739	0.647981	0.0019	0.0214646	116.581	63.4739	0.877101	5e-05	0.00119245
ENSSSCT00000028446	ENSSSCG00000026414	ATOX1	GL894053.2:177-6167	140.412	61.9863	1.17965	5e-05	0.00119245	277.467	61.9863	2.16229	5e-05	0.00119245
ENSSSCT00000009269	ENSSSCG00000008467	EML4	chr3:104143456-104231472	39.3051	61.8337	-0.653679	0.0017	0.0196705	36.1732	61.8337	-0.773473	0.0003	0.00520502
ENSSSCT00000004831	ENSSSCG00000004370	ATG5	JH118901.1:353757-449236	16.3792	61.4935	-1.90857	0.0001	0.00214362	16.4958	61.4935	-1.89833	0.0065	0.0530437
ENSSSCT00000012055	ENSSSCG00000011013	WAC	chr10:44120644-44210868	35.7234	61.4725	-0.783074	0.00035	0.0058827	32.6063	61.4725	-0.91479	5e-05	0.00119245
ENSSSCT00000033106	ENSSSCG00000030898	MAFB	chr17:48698398-48701183	33.9025	61.1911	-0.851932	0.0001	0.00214362	38.0773	61.1911	-0.684392	0.00105	0.0137227
ENSSSCT00000005522	ENSSSCG00000005006	MGAT2	chr1:199864395-199866221	92.9187	61.0808	0.605249	0.00255	0.0266091	92.3941	61.0808	0.59708	0.00295	0.0297356
ENSSSCT00000007475	ENSSSCG00000006824	GNAI3	chr4:120992200-121038050	92.1696	60.8055	0.600089	0.00295	0.0297356	89.4791	60.8055	0.557349	0.008	0.0615186
ENSSSCT00000025172	ENSSSCG00000026605	BPI	chr17:46797708-46828347	39.4591	60.3981	-0.614146	0.0138	0.0909862	54.143	60.3981	-0.157727	0.51465	0.823829
ENSSSCT00000016291	ENSSSCG00000014934	CHORDC1	chr9:26043363-26060761	29.0476	59.9105	-1.04439	5e-05	0.00119245	36.6496	59.9105	-0.709011	0.00045	0.00719494
ENSSSCT00000028571	ENSSSCG00000027757	FIS1	GL896338.2:43697-47176	99.6432	59.4415	0.745301	0.00065	0.00953497	88.1296	59.4415	0.568157	0.00845	0.0640856
ENSSSCT00000017599	ENSSSCG00000016164	IKZF2	chr15:127685829-127740305	34.436	59.2387	-0.78262	0.0001	0.00214362	33.9004	59.2387	-0.805236	5e-05	0.00119245
ENSSSCT00000033486	ENSSSCG00000015955	ITGA6	chr15:87830504-87899183	36.9604	59.1544	-0.678505	0.00755	0.0589508	38.1036	59.1544	-0.63456	0.0131	0.0877176
ENSSSCT00000024461	ENSSSCG00000022912	NT5C3A	chr18:44383494-44425983	130.556	59.0294	1.14516	5e-05	0.00119245	90.0064	59.0294	0.608593	0.00675	0.0545757
ENSSSCT00000019047	ENSSSCG00000017494	IKZF3	chr12:22924802-23013416	23.9579	58.9347	-1.29862	5e-05	0.00119245	23.1341	58.9347	-1.3491	5e-05	0.00119245
ENSSSCT00000027367	ENSSSCG00000026957	RNASE6	GL894259.1:38056-38598	18.298	58.7898	-1.68388	5e-05	0.00119245	14.5758	58.7898	-2.01199	5e-05	0.00119245
ENSSSCT00000024866	ENSSSCG00000023223	ZNF22	chr14:99328207-99328885	35.6817	58.1298	-0.704094	0.0011	0.0142222	33.1362	58.1298	-0.810868	0.0002	0.003754
ENSSSCT00000005658	ENSSSCG00000005132	CDKN2B	chr1:223956056-223958921	36.8282	57.8073	-0.650441	0.00835	0.0635229	41.8654	57.8073	-0.465493	0.06145	0.253025
ENSSSCT00000004793	ENSSSCG00000004337	MANEA	chr1:71027086-71081123	26.4091	56.9306	-1.10817	5e-05	0.00119245	20.1965	56.9306	-1.4951	5e-05	0.00119245
ENSSSCT00000014825	ENSSSCG00000013573	TRAPPC5	chr2:71884250-71886383	151.453	56.885	1.41275	5e-05	0.00119245	153.095	56.885	1.42831	5e-05	0.00119245
ENSSSCT00000005185	ENSSSCG00000004695	WDR76	chr1:142483491-142568978	33.6122	56.8755	-0.758823	0.0003	0.00520502	33.147	56.8755	-0.778927	0.0001	0.00214362
ENSSSCT00000005714	ENSSSCG00000005183	PSIP1	chr1:230981733-231017408	22.1898	56.8168	-1.35642	5e-05	0.00119245	20.1865	56.8168	-1.49293	5e-05	0.00119245
ENSSSCT00000014232	ENSSSCG00000013021	SF1	chr2:6524029-6536326	27.6333	56.4849	-1.03146	5e-05	0.00119245	30.138	56.4849	-0.906284	0.0001	0.00214362
ENSSSCT00000011499	ENSSSCG00000010509	PIK3AP1	chr14:117674450-117788256	33.5302	56.2904	-0.747427	0.0009	0.0122346	32.8742	56.2904	-0.77593	0.0006	0.00895758
ENSSSCT00000012752	ENSSSCG00000011650	MSL2	chr13:84520139-84550064	36.3371	56.106	-0.626712	0.0018	0.0205452	35.2263	56.106	-0.671505	0.0008	0.0111573
ENSSSCT00000027193	ENSSSCG00000024817	RASSF2	chr17:14563016-14588375	36.5608	56.0316	-0.615941	0.0077	0.0597357	37.3065	56.0316	-0.586811	0.0079	0.0609473
ENSSSCT00000025963	ENSSSCG00000029173	TMEM167A	chr2:93411266-93426964	140.732	55.2539	1.34881	0.00755	0.0589508	300.662	55.2539	2.444	5e-05	0.00119245
ENSSSCT00000006919	ENSSSCG00000006312	GPA33	chr4:91579099-91641126	96.0211	55.2374	0.797705	0.00015	0.00297337	117.131	55.2374	1.08441	5e-05	0.00119245
ENSSSCT00000004279	ENSSSCG00000003867	TXNDC12	chr6:147854471-147870983	34.2349	54.9016	-0.68138	0.00225	0.0242293	40.3769	54.9016	-0.44332	0.039	0.187575
ENSSSCT00000005554	ENSSSCG00000005038	PSMC6	chr1:202599688-202625517	110.079	54.8325	1.00544	5e-05	0.00119245	114.934	54.8325	1.06771	5e-05	0.00119245
ENSSSCT00000016406	ENSSSCG00000015040	PTS	chr9:44771847-44778992	103.007	54.7499	0.911807	5e-05	0.00119245	95.008	54.7499	0.795192	0.0007	0.010104
ENSSSCT00000023518	ENSSSCG00000024385	RNASEH2B	GL892680.2:141112-183493	35.2266	54.5849	-0.631839	0.00175	0.0201145	34.0926	54.5849	-0.679043	0.00085	0.0116991
ENSSSCT00000008971	ENSSSCG00000008192	TMEM131	chr3:58923016-59040071	33.5168	54.2626	-0.695074	0.00425	0.0390669	32.3348	54.2626	-0.74687	0.0019	0.0214646
ENSSSCT00000010120	ENSSSCG00000009240	PLAC8	chr8:144545690-144573889	111.764	54.1231	1.04614	5e-05	0.00119245	102.751	54.1231	0.924837	0.0005	0.00778241
ENSSSCT00000028421	ENSSSCG00000021644	BRD7	GL895152.1:20043-61695	34.7464	53.874	-0.632725	0.00165	0.0192591	32.5333	53.874	-0.727672	0.00015	0.00297337
ENSSSCT00000010856	ENSSSCG00000009906	SRSF9	chr14:42892688-42901227	89.0729	53.7017	0.73002	0.00055	0.00838524	94.5124	53.7017	0.815537	0.0001	0.00214362
ENSSSCT00000005857	ENSSSCG00000005318	CREB3	chr1:264176183-264181561	83.4884	53.6681	0.637511	0.001	0.013215	85.745	53.6681	0.675988	0.0004	0.00655605
ENSSSCT00000006498	ENSSSCG00000005918	DGAT1	chr4:599696-609272	92.3247	52.6918	0.809138	0.0001	0.00214362	100.024	52.6918	0.924688	5e-05	0.00119245
ENSSSCT00000001535	ENSSSCG00000001405	LTB	chr7:27543863-27547161	150.538	52.5813	1.51751	5e-05	0.00119245	151.39	52.5813	1.52564	5e-05	0.00119245
ENSSSCT00000017170	ENSSSCG00000015769	SPCS3	chr15:44496158-44505427	102.375	52.4831	0.963941	5e-05	0.00119245	112.451	52.4831	1.09936	5e-05	0.00119245
ENSSSCT00000007513	ENSSSCG00000006860	SLC30A7	chr4:128863164-128939924	30.4348	52.4466	-0.785125	0.0002	0.003754	30.8538	52.4466	-0.765399	0.00015	0.00297337
ENSSSCT00000024337	ENSSSCG00000027677	ABI3	chr12:25368697-25383610	30.3973	52.4296	-0.786439	0.00015	0.00297337	27.0394	52.4296	-0.955318	5e-05	0.00119245
ENSSSCT00000030237	ENSSSCG00000021511	GCSAM	chr13:157394413-157415506	32.9762	52.1682	-0.661745	0.003	0.0300926	33.1099	52.1682	-0.655907	0.002	0.0222139
ENSSSCT00000014049	ENSSSCG00000012853	IRF7	chr2:299389-333963	102.48	52.1286	0.975192	0.007	0.0559327	131.445	52.1286	1.33431	0.00095	0.0127118
ENSSSCT00000005066	ENSSSCG00000004587	MYO1E	chr1:124676342-124901532	29.074	52.0641	-0.840558	5e-05	0.00119245	32.9298	52.0641	-0.660895	0.00175	0.0201145
ENSSSCT00000029647	ENSSSCG00000025133	ITGB2	chr13:217446027-217475903	32.7665	52.0465	-0.66758	0.0019	0.0214646	32.0167	52.0465	-0.700975	0.00135	0.0165389
ENSSSCT00000012641	ENSSSCG00000011551	TADA3	chr13:73071410-73079829	32.3382	52.007	-0.685467	0.001	0.013215	32.8934	52.007	-0.660906	0.0018	0.0205452
ENSSSCT00000016863	ENSSSCG00000015480	PRRC2C	chr9:125431811-125532069	30.6609	51.8589	-0.758188	0.0042	0.038713	29.8258	51.8589	-0.798032	0.00245	0.025797
ENSSSCT00000001741	ENSSSCG00000001562	KCTD20	chr7:37046644-37093046	30.575	51.6272	-0.755778	0.00025	0.00449095	34.5142	51.6272	-0.580941	0.00385	0.0363563
ENSSSCT00000014675	ENSSSCG00000013431	ATP5D	chr2:77782630-77784866	103.787	51.5709	1.009	5e-05	0.00119245	122.29	51.5709	1.24568	5e-05	0.00119245
ENSSSCT00000005290	ENSSSCG00000004791	RASGRP1	chr1:148187751-148270286	30.1798	51.557	-0.772582	0.0004	0.00655605	28.8263	51.557	-0.838783	0.0001	0.00214362
ENSSSCT00000009185	ENSSSCG00000008388	REL	chr3:84967853-85003436	19.2007	51.4953	-1.42328	5e-05	0.00119245	18.4312	51.4953	-1.48229	5e-05	0.00119245
ENSSSCT00000001612	ENSSSCG00000001455	SLA-DRB1	chr7:29113231-29125494	89.4405	51.2526	0.803304	0.00035	0.0058827	80.3148	51.2526	0.648042	0.00425	0.0390669
ENSSSCT00000007805	ENSSSCG00000007133	ACSS1	chr17:34950890-34988723	80.0013	51.2518	0.642419	0.0015	0.0178968	93.5208	51.2518	0.867684	5e-05	0.00119245
ENSSSCT00000015143	ENSSSCG00000013863	SMIM7	chr2:60549158-60553577	112.562	51.1228	1.13868	0.0005	0.00778241	165.38	51.1228	1.69375	5e-05	0.00119245
ENSSSCT00000025707	ENSSSCG00000029593	FOXN2	chr3:98079345-98147165	32.6165	51.0151	-0.645324	0.0035	0.0339068	30.7458	51.0151	-0.730535	0.0008	0.0111573
ENSSSCT00000008944	ENSSSCG00000008167	CNOT11	chr3:55610358-55626952	31.2236	50.9356	-0.70604	0.00015	0.00297337	31.4107	50.9356	-0.697418	0.00025	0.00449095
ENSSSCT00000031591	ENSSSCG00000020686	SDHA	GL896405.1:25992-42468	76.856	50.7316	0.599272	0.0036	0.0345772	81.2797	50.7316	0.68001	0.0008	0.0111573
ENSSSCT00000000387	ENSSSCG00000000364	SARNP	chr5:22686700-22732508	80.5156	50.6422	0.668929	0.00165	0.0192591	74.7284	50.6422	0.561316	0.0108	0.0762843
ENSSSCT00000009807	ENSSSCG00000008953	CXCL8	chr8:74083529-74086750	15.5556	50.3854	-1.69558	5e-05	0.00119245	16.3449	50.3854	-1.62417	5e-05	0.00119245
ENSSSCT00000012624	ENSSSCG00000011534	BHLHE40	chr13:67832082-67836984	31.3234	50.2917	-0.68308	0.00095	0.0127118	28.4979	50.2917	-0.819465	5e-05	0.00119245
ENSSSCT00000026071	ENSSSCG00000022295	C9orf16	chr1:302606723-302610204	106.311	50.2086	1.08228	5e-05	0.00119245	109.617	50.2086	1.12646	5e-05	0.00119245
ENSSSCT00000001150	ENSSSCG00000001056	RANBP9	chr7:10287340-10323692	25.466	50.1814	-0.978584	5e-05	0.00119245	23.5697	50.1814	-1.09022	5e-05	0.00119245
ENSSSCT00000006656	ENSSSCG00000006066	RNF19A	chr4:39576525-39650587	29.496	49.7662	-0.754646	0.00105	0.0137227	26.2209	49.7662	-0.924449	0.0001	0.00214362
ENSSSCT00000010229	ENSSSCG00000009334	HSPH1	chr11:7585524-7661067	32.0143	49.5595	-0.630443	0.00345	0.0335647	71.9504	49.5595	0.537843	0.0444	0.204493
ENSSSCT00000035898	ENSSSCG00000010451	IFIT2	chr14:110179711-110190465	94.897	49.4352	0.940823	0.00785	0.060642	75.0715	49.4352	0.602726	0.07165	0.279212
ENSSSCT00000013063	ENSSSCG00000023842	TRAT1	chr13:159759026-159796242	22.5192	49.4191	-1.13391	0.00355	0.034246	16.5518	49.4191	-1.57808	0.0002	0.003754
ENSSSCT00000015057	ENSSSCG00000013780	TECR	chr2:65188525-65191215	30.9344	49.4021	-0.675362	0.0013	0.0160896	29.2808	49.4021	-0.754615	0.00025	0.00449095
ENSSSCT00000027379	ENSSSCG00000029203	TOX4	chr7:83003426-83059039	29.0462	49.3655	-0.765152	0.016	0.101386	32.3164	49.3655	-0.611236	0.05325	0.23091
ENSSSCT00000016737	ENSSSCG00000015362	TSPAN13	chr9:94864069-94874724	84.7396	49.0656	0.788324	0.00025	0.00449095	71.5202	49.0656	0.543639	0.0093	0.0686683
ENSSSCT00000006403	ENSSSCG00000005826	PHPT1	chr1:313819453-313820674	81.3908	48.9791	0.732699	0.00375	0.0356116	95.942	48.9791	0.969997	0.0004	0.00655605
ENSSSCT00000029353	ENSSSCG00000026302	MKI67	chr14:149170561-149198585	32.4698	48.9133	-0.59113	0.03335	0.168907	31.4293	48.9133	-0.638117	0.0198	0.117767
ENSSSCT00000007620	ENSSSCG00000006955	GSDMD	chr4:1054260-1057775	77.1672	48.791	0.661372	0.0008	0.0111573	75.4036	48.791	0.628018	0.0025	0.0262156
ENSSSCT00000026996	ENSSSCG00000027441	RPL22L1	chr13:118437978-118499704	156.431	48.5962	1.68662	5e-05	0.00119245	174.398	48.5962	1.84347	5e-05	0.00119245
ENSSSCT00000009507	ENSSSCG00000008690	RNF4	chr8:918501-944201	29.7736	48.5395	-0.705127	0.00055	0.00838524	31.9564	48.5395	-0.603057	0.003	0.0300926
ENSSSCT00000010430	ENSSSCG00000009513	SLC15A1	chr11:74889141-74924577	77.3919	48.4169	0.676672	0.00275	0.0281588	86.8087	48.4169	0.842328	0.00045	0.00719494
ENSSSCT00000017360	ENSSSCG00000015943	GORASP2	chr15:86481989-86513748	24.9356	47.9749	-0.944069	5e-05	0.00119245	26.0109	47.9749	-0.883165	5e-05	0.00119245
ENSSSCT00000032023	ENSSSCG00000014672	TRIM6	chr9:4689734-4720219	23.0876	47.4936	-1.04062	0.00065	0.00953497	27.8267	47.4936	-0.771263	0.0013	0.0160896
ENSSSCT00000027309	ENSSSCG00000020799	CPSF3	chr3:135136901-135174164	30.2295	47.3897	-0.648617	0.0016	0.018837	29.0564	47.3897	-0.705714	0.0008	0.0111573
ENSSSCT00000017109	ENSSSCG00000015709	SLC35F5	chr15:22548113-22594753	79.2977	47.2819	0.745991	0.0003	0.00520502	77.7924	47.2819	0.718342	0.0011	0.0142222
ENSSSCT00000004933	ENSSSCG00000004466	TTK	chr1:96792804-96828323	18.6326	47.0614	-1.33671	5e-05	0.00119245	17.0456	47.0614	-1.46514	5e-05	0.00119245
ENSSSCT00000014304	ENSSSCG00000013086	CYB561A3	chr2:9694929-9703036	30.4953	47.0492	-0.625586	0.00415	0.0383737	34.6078	47.0492	-0.443073	0.0396	0.189577
ENSSSCT00000016377	ENSSSCG00000015013	RDX	chr9:42953205-43009694	25.6139	46.8968	-0.872562	5e-05	0.00119245	19.1601	46.8968	-1.29138	5e-05	0.00119245
ENSSSCT00000016659	ENSSSCG00000015288	RBBP5	chr9:72016827-72035637	28.2641	46.8887	-0.730266	0.0005	0.00778241	29.8072	46.8887	-0.653577	0.0018	0.0205452
ENSSSCT00000000530	ENSSSCG00000000492	LYZ	chr5:36179189-36185575	307.542	46.7847	2.71667	5e-05	0.00119245	432.725	46.7847	3.20934	5e-05	0.00119245
ENSSSCT00000008433	ENSSSCG00000007692	YWHAG	chr3:9882204-9911156	30.6965	46.6653	-0.604278	0.00355	0.034246	34.5818	46.6653	-0.43234	0.03485	0.173807
ENSSSCT00000006773	ENSSSCG00000006179	STAU2	chr4:67947282-68020677	17.9964	46.6	-1.37262	5e-05	0.00119245	17.2758	46.6	-1.43157	5e-05	0.00119245
ENSSSCT00000035014	ENSSSCG00000014878	PAK1	chr9:12979526-13124092	24.4613	46.5973	-0.929746	0.00695	0.0556722	18.9034	46.5973	-1.3016	0.0008	0.0111573
ENSSSCT00000015222	ENSSSCG00000013936	NDUFA13	chr2:58287585-58296458	71.9703	46.5486	0.628662	0.00305	0.0305033	90.1566	46.5486	0.953695	5e-05	0.00119245
ENSSSCT00000005840	ENSSSCG00000005302	STOML2	chr1:263416860-263420329	74.6943	46.3212	0.689324	0.00085	0.0116991	82.317	46.3212	0.829518	0.0001	0.00214362
ENSSSCT00000006771	ENSSSCG00000006177	UBE2W	chr4:67750156-67790546	24.3184	46.1177	-0.92327	5e-05	0.00119245	24.8353	46.1177	-0.892925	5e-05	0.00119245
ENSSSCT00000015021	ENSSSCG00000013747	RAD23A	chr2:66289563-66295135	30.1661	45.9636	-0.607565	0.00345	0.0335647	31.3364	45.9636	-0.552651	0.00655	0.0533632
ENSSSCT00000011297	ENSSSCG00000010320	VDAC2	JH118641.1:10524-22938	80.1481	45.9353	0.803067	0.0001	0.00214362	91.1538	45.9353	0.988701	5e-05	0.00119245
ENSSSCT00000015417	ENSSSCG00000014114	PAPD4	chr2:90128251-90181088	23.2689	45.8928	-0.979866	5e-05	0.00119245	19.4918	45.8928	-1.2354	5e-05	0.00119245
ENSSSCT00000007705	ENSSSCG00000026893	NAT1	chr17:14206993-14216749	78.6541	45.805	0.780018	0.00025	0.00449095	79.439	45.805	0.794344	0.0002	0.003754
ENSSSCT00000011093	ENSSSCG00000010132	COMT	chr14:55034980-55059725	107.156	45.7528	1.22779	0.01545	0.0988896	115.331	45.7528	1.33385	0.00945	0.0694792
ENSSSCT00000007211	ENSSSCG00000006582	S100A14	chr4:104969374-104971615	147.753	45.7083	1.69266	5e-05	0.00119245	136.191	45.7083	1.57511	5e-05	0.00119245
ENSSSCT00000022506	ENSSSCG00000029082	KMT2E	chr9:115608961-115726916	28.7823	45.6412	-0.665156	0.00195	0.0218749	24.3905	45.6412	-0.904016	5e-05	0.00119245
ENSSSCT00000018339	ENSSSCG00000016842	NIPBL	chr16:23393876-23511836	30.0711	45.3586	-0.592996	0.0074	0.05812	27.9557	45.3586	-0.698232	0.00215	0.0234086
ENSSSCT00000013641	ENSSSCG00000012474	DIAPH2	chrX:85891070-86317742	22.1482	45.2988	-1.03228	5e-05	0.00119245	18.7233	45.2988	-1.27464	5e-05	0.00119245
ENSSSCT00000032127	ENSSSCG00000025686	KMO	chr10:14889941-14937373	28.3727	45.1348	-0.669737	0.00125	0.015631	23.3468	45.1348	-0.951017	5e-05	0.00119245
ENSSSCT00000016349	ENSSSCG00000014986	MMP3	chr9:37393982-37401150	28.5752	45.0225	-0.655884	0.01465	0.095043	31.2908	45.0225	-0.524909	0.0474	0.213545
ENSSSCT00000035426	ENSSSCG00000023277	NDUFA1	chrX:113388189-113393319	88.8114	45.0218	0.980123	0.00135	0.0165389	97.1073	45.0218	1.10896	0.0004	0.00655605
ENSSSCT00000023591	ENSSSCG00000023984	RSL1D1	GL893953.2:105742-117192	26.8563	45.0207	-0.745325	0.00015	0.00297337	24.9186	45.0207	-0.853366	0.0001	0.00214362
ENSSSCT00000004857	ENSSSCG00000004394	RPF2	chr1:86305688-86345801	26.3354	44.9919	-0.772662	0.0003	0.00520502	26.0508	44.9919	-0.788336	0.0002	0.003754
ENSSSCT00000007517	ENSSSCG00000006864	CDC14A	chr4:129251463-129503638	26.7919	44.9607	-0.746869	0.0011	0.0142222	25.4685	44.9607	-0.819947	0.001	0.013215
ENSSSCT00000008352	ENSSSCG00000007623	BUD31	chr3:6683310-6699273	71.3688	44.9024	0.6685	0.01595	0.101159	75.4897	44.9024	0.749487	0.0074	0.05812
ENSSSCT00000017748	ENSSSCG00000016298	INPP5D	chr15:147606611-147668699	19.7287	44.8174	-1.18376	5e-05	0.00119245	19.4381	44.8174	-1.20517	5e-05	0.00119245
ENSSSCT00000016762	ENSSSCG00000015387	TRA2A	chr9:101626620-101651258	29.4223	44.6776	-0.602639	0.00175	0.0201145	29.0329	44.6776	-0.621861	0.00225	0.0242293
ENSSSCT00000006548	ENSSSCG00000005965	MYC	chr4:12778443-12783481	28.3306	44.6674	-0.656861	0.00105	0.0137227	27.7612	44.6674	-0.686154	0.00065	0.00953497
ENSSSCT00000018498	ENSSSCG00000016988	ERGIC1	chr16:55597413-55717142	24.8008	44.6283	-0.847572	5e-05	0.00119245	25.5728	44.6283	-0.80335	0.0001	0.00214362
ENSSSCT00000018828	ENSSSCG00000017296	ACE	chr12:15381359-15401171	82.7605	44.5723	0.892794	0.0081	0.062101	75.6801	44.5723	0.763766	0.0188	0.113701
ENSSSCT00000008216	ENSSSCG00000007504	RBM38	chr17:64947370-64962212	26.7124	44.5018	-0.736355	0.0004	0.00655605	25.7625	44.5018	-0.788594	0.0001	0.00214362
ENSSSCT00000010462	ENSSSCG00000009544	COL4A1	chr11:84373662-84432619	77.6559	44.3491	0.808189	0.0008	0.0111573	82.8593	44.3491	0.901758	0.0002	0.003754
ENSSSCT00000008612	ENSSSCG00000007861	GP2	chr3:26272814-26292580	25.1594	44.2782	-0.815502	0.001	0.013215	40.8756	44.2782	-0.115356	0.618	0.88321
ENSSSCT00000017929	ENSSSCG00000016466	GSTK1	chr18:7234189-7239985	88.0176	44.2475	0.992196	5e-05	0.00119245	85.2394	44.2475	0.945925	5e-05	0.00119245
ENSSSCT00000017914	ENSSSCG00000016451	GIMAP1	chr18:6872940-6875292	79.0475	44.1799	0.839331	5e-05	0.00119245	68.1318	44.1799	0.624939	0.00195	0.0218749
ENSSSCT00000033656	ENSSSCG00000007718	CLDN4	chr3:10776891-10780656	89.9287	44.136	1.02682	0.0001	0.00214362	111.004	44.136	1.33059	5e-05	0.00119245
ENSSSCT00000032072	ENSSSCG00000023777	ATP5L	chr9:50747514-50757754	72.5786	44.1133	0.71833	0.00075	0.0106787	94.861	44.1133	1.1046	5e-05	0.00119245
ENSSSCT00000030250	ENSSSCG00000021461	SNF8	chr12:25108598-25118615	77.4951	44.1079	0.81307	0.00025	0.00449095	87.6961	44.1079	0.991478	5e-05	0.00119245
ENSSSCT00000004575	ENSSSCG00000004140	VTA1	chr1:25508756-25540362	23.2979	44.0677	-0.919524	5e-05	0.00119245	20.5351	44.0677	-1.10163	5e-05	0.00119245
ENSSSCT00000003508	ENSSSCG00000003158	DHDH	chr6:50111385-50118034	77.0161	44.0546	0.805869	0.00015	0.00297337	106.088	44.0546	1.2679	5e-05	0.00119245
ENSSSCT00000018399	ENSSSCG00000016894	ARL15	chr16:35278524-35417710	21.8565	43.8238	-1.00365	0.00015	0.00297337	27.5271	43.8238	-0.67086	0.0065	0.0530437
ENSSSCT00000016697	ENSSSCG00000015324	GNG11	chr9:80762597-80767739	73.3539	43.7253	0.746403	0.0003	0.00520502	67.8632	43.7253	0.63416	0.0018	0.0205452
ENSSSCT00000032638	ENSSSCG00000012382	IGBP1	chrX:63355957-63403342	71.9938	43.7178	0.719651	0.00085	0.0116991	70.6409	43.7178	0.692284	0.0015	0.0178968
ENSSSCT00000000041	ENSSSCG00000000039	POLDIP3	chr5:3524037-3534832	28.2299	43.6908	-0.630108	0.00125	0.015631	28.5424	43.6908	-0.614223	0.00245	0.025797
ENSSSCT00000006154	ENSSSCG00000005596	ARPC5L	chr1:299470823-299479050	71.3427	43.547	0.712192	0.0006	0.00895758	78.7543	43.547	0.854785	5e-05	0.00119245
ENSSSCT00000030823	ENSSSCG00000024026	SUMO3	chr13:217406418-217415364	80.397	43.5442	0.88466	5e-05	0.00119245	86.2432	43.5442	0.98593	5e-05	0.00119245
ENSSSCT00000007547	ENSSSCG00000006892	DNTTIP2	chr4:135040474-135055556	29.0029	43.5222	-0.585555	0.0039	0.0367092	28.9998	43.5222	-0.585707	0.0051	0.0445568
ENSSSCT00000011247	ENSSSCG00000010275	PCBD1	chr14:79648885-79655375	69.2153	43.2767	0.677501	0.00125	0.015631	63.4005	43.2767	0.550903	0.00885	0.0661084
ENSSSCT00000010770	ENSSSCG00000009827	HVCN1	chr14:33898492-33943793	25.5856	43.2464	-0.757247	0.00075	0.0106787	25.2762	43.2464	-0.774798	0.0005	0.00778241
ENSSSCT00000005854	ENSSSCG00000005316	TPM2	chr1:264127280-264134736	190.933	42.8526	2.15562	5e-05	0.00119245	103.242	42.8526	1.26858	5e-05	0.00119245
ENSSSCT00000017661	ENSSSCG00000016220	DNPEP	chr15:134425136-134437835	66.0997	42.843	0.625583	0.0026	0.0269681	80.3491	42.843	0.907221	5e-05	0.00119245
ENSSSCT00000014877	ENSSSCG00000013622	TMEM205	chr2:70400089-70402922	65.4989	42.8162	0.613312	0.0031	0.0308875	67.2909	42.8162	0.652252	0.00215	0.0234086
ENSSSCT00000030797	ENSSSCG00000029183	SEC11A	GL895957.1:20980-41365	77.8947	42.7227	0.866523	5e-05	0.00119245	78.1976	42.7227	0.872122	5e-05	0.00119245
ENSSSCT00000007907	ENSSSCG00000007227	ID1	chr17:40187155-40188384	97.8536	42.5744	1.20064	5e-05	0.00119245	108.343	42.5744	1.34755	5e-05	0.00119245
ENSSSCT00000003036	ENSSSCG00000002740	AP1G1	chr6:14338270-14399420	28.2362	42.5727	-0.592383	0.0051	0.0445568	28.4115	42.5727	-0.583456	0.00555	0.0473756
ENSSSCT00000009828	ENSSSCG00000008973	NAAA	chr8:75709378-75738808	25.6107	42.5595	-0.732732	0.0007	0.010104	21.6158	42.5595	-0.977395	5e-05	0.00119245
ENSSSCT00000005259	ENSSSCG00000004760	PPP1R14D	chr1:145643558-145829619	90.4848	42.4466	1.09203	0.0144	0.093945	94.3684	42.4466	1.15266	0.01185	0.0815406
ENSSSCT00000027524	ENSSSCG00000021343	ZEB2	chr15:7946300-7980509	22.4615	42.386	-0.916135	5e-05	0.00119245	16.95	42.386	-1.3223	5e-05	0.00119245
ENSSSCT00000009214	ENSSSCG00000008414	ERLEC1	chr3:92521481-92657477	27.7408	42.3823	-0.611449	0.021	0.122625	26.7604	42.3823	-0.663363	0.01185	0.0815406
ENSSSCT00000005124	ENSSSCG00000004639	USP8	chr1:134748669-134815999	26.6264	42.3504	-0.669519	0.00095	0.0127118	26.8689	42.3504	-0.656439	0.00115	0.01472
ENSSSCT00000012249	ENSSSCG00000011186	COL6A5	chr13:1791732-1881007	22.33	42.2098	-0.918594	0.00035	0.0058827	18.4646	42.2098	-1.19281	5e-05	0.00119245
ENSSSCT00000003716	ENSSSCG00000003347	MRPL20	chr6:58274548-58279707	85.9368	42.0169	1.03231	5e-05	0.00119245	84.9351	42.0169	1.01539	5e-05	0.00119245
ENSSSCT00000009240	ENSSSCG00000008439	RHOQ	chr3:100058021-100097054	17.903	41.9752	-1.22933	5e-05	0.00119245	15.8713	41.9752	-1.40311	5e-05	0.00119245
ENSSSCT00000007143	ENSSSCG00000006522	GBA	chr4:103366816-103394263	27.7345	41.7482	-0.590031	0.0193	0.115686	27.3971	41.7482	-0.607693	0.01995	0.118363
ENSSSCT00000000139	ENSSSCG00000000133	TST	chr5:8349104-8358974	84.3951	41.7349	1.01591	5e-05	0.00119245	95.2271	41.7349	1.19012	5e-05	0.00119245
ENSSSCT00000018632	ENSSSCG00000017114	NDUFS6	chr16:85609821-85615984	79.7576	41.6661	0.936748	5e-05	0.00119245	96.496	41.6661	1.2116	5e-05	0.00119245
ENSSSCT00000004139	ENSSSCG00000003738	MAPRE2	chr6:111324051-111388859	26.1591	41.5724	-0.668314	0.00165	0.0192591	27.2396	41.5724	-0.609917	0.004	0.0373974
ENSSSCT00000028713	ENSSSCG00000027827	GALE	chr6:75416183-75420892	68.3123	41.3776	0.723294	0.00045	0.00719494	87.2499	41.3776	1.0763	5e-05	0.00119245
ENSSSCT00000002248	ENSSSCG00000002009	PCK2	chr7:80458470-80468943	92.3459	41.3207	1.16018	5e-05	0.00119245	83.0188	41.3207	1.00657	5e-05	0.00119245
ENSSSCT00000006566	ENSSSCG00000005983	ATAD2	chr4:16755853-16823398	26.4771	41.3	-0.641398	0.0024	0.0254043	25.5058	41.3	-0.695318	0.0011	0.0142222
ENSSSCT00000010008	ENSSSCG00000009140	CASP6	chr8:120669697-120678410	77.1511	41.1279	0.907568	5e-05	0.00119245	81.5432	41.1279	0.987447	5e-05	0.00119245
ENSSSCT00000035138	ENSSSCG00000012440	PGK1	chrX:71321307-71352751	5.45303	41.0626	-2.9127	0.0393	0.18855	9.90482	41.0626	-2.05162	0.15495	0.451514
ENSSSCT00000027672	ENSSSCG00000024623	USP25	chr13:190890291-191009147	27.3482	41.0369	-0.585473	0.0051	0.0445568	23.6573	41.0369	-0.794638	0.0001	0.00214362
ENSSSCT00000000833	ENSSSCG00000000769	BID	chr5:72118716-72143297	67.1359	40.8337	0.717325	0.00055	0.00838524	62.0965	40.8337	0.604752	0.004	0.0373974
ENSSSCT00000001678	ENSSSCG00000001505	PFDN6	chr7:34157442-34158709	72.4759	40.7172	0.831863	0.0005	0.00778241	81.2179	40.7172	0.996159	5e-05	0.00119245
ENSSSCT00000010838	ENSSSCG00000009888	ERP29	chr14:42178736-42187586	87.9172	40.5563	1.11622	5e-05	0.00119245	100.207	40.5563	1.30499	5e-05	0.00119245
ENSSSCT00000005049	ENSSSCG00000004570	TPM1	chr1:120217105-120240145	157.399	40.3896	1.96237	5e-05	0.00119245	95.519	40.3896	1.2418	5e-05	0.00119245
ENSSSCT00000007305	ENSSSCG00000006667	BOLA1	chr4:108562210-108563389	69.2017	40.3018	0.779961	0.00045	0.00719494	65.7	40.3018	0.705047	0.00075	0.0106787
ENSSSCT00000009871	ENSSSCG00000009012	TMEM154	chr8:80945043-80965689	16.4164	40.2076	-1.29233	5e-05	0.00119245	15.9059	40.2076	-1.3379	5e-05	0.00119245
ENSSSCT00000015296	ENSSSCG00000014004	PLPP2	chr2:79284628-79297163	66.6096	40.1686	0.729663	0.00075	0.0106787	70.8518	40.1686	0.818737	0.00015	0.00297337
ENSSSCT00000018606	ENSSSCG00000017089	ANXA6	chr16:78094268-78115994	68.0552	39.9325	0.769144	0.00015	0.00297337	70.0722	39.9325	0.811281	5e-05	0.00119245
ENSSSCT00000028105	ENSSSCG00000026064	LSM5	chr18:44736381-44739855	100.181	39.7427	1.33384	5e-05	0.00119245	95.732	39.7427	1.26831	5e-05	0.00119245
ENSSSCT00000026740	ENSSSCG00000021222	MCT7	GL896400.1:1358-2680	8.43789	39.5558	-2.22894	5e-05	0.00119245	5.63051	39.5558	-2.81255	5e-05	0.00119245
ENSSSCT00000002524	ENSSSCG00000002266	CHD2	chr7:91877497-92002591	20.1304	39.4953	-0.972305	0.00035	0.0058827	17.526	39.4953	-1.17219	5e-05	0.00119245
ENSSSCT00000017118	ENSSSCG00000015718	C2orf76	chr15:28517963-28578003	15.2448	39.4883	-1.37311	5e-05	0.00119245	16.8222	39.4883	-1.23105	5e-05	0.00119245
ENSSSCT00000013313	ENSSSCG00000012171	PRDX4	chrX:21167783-21189764	78.3785	39.3278	0.994908	5e-05	0.00119245	94.4767	39.3278	1.26441	5e-05	0.00119245
ENSSSCT00000031001	ENSSSCG00000023522	TGM2	chr17:46592135-46629982	25.4743	39.3105	-0.625873	0.0102	0.0732511	27.1033	39.3105	-0.536443	0.0273	0.147041
ENSSSCT00000030631	ENSSSCG00000029230	ECM1	chr4:107904737-107909631	19.2693	39.2512	-1.02643	5e-05	0.00119245	19.6066	39.2512	-1.0014	5e-05	0.00119245
ENSSSCT00000015047	ENSSSCG00000013772	ASF1B	chr2:65338637-65348235	25.0918	39.1871	-0.643161	0.0022	0.0238111	24.9822	39.1871	-0.649474	0.00165	0.0192591
ENSSSCT00000008022	ENSSSCG00000007331	RBL1	chr17:45642977-45716789	22.7771	39.1558	-0.781644	5e-05	0.00119245	21.9026	39.1558	-0.838124	5e-05	0.00119245
ENSSSCT00000010839	ENSSSCG00000009889	ALDH2	chr14:42378890-42409687	67.4758	39.1548	0.785181	5e-05	0.00119245	72.2354	39.1548	0.883517	5e-05	0.00119245
ENSSSCT00000018255	ENSSSCG00000016769	CDK13	chr18:59601835-59696078	23.8214	39.1266	-0.715892	0.0006	0.00895758	23.6587	39.1266	-0.725777	0.00045	0.00719494
ENSSSCT00000026956	ENSSSCG00000025698	SERPINE1	GL894574.1:16238-22640	23.1199	38.9994	-0.754315	0.00025	0.00449095	25.041	38.9994	-0.63916	0.0021	0.0230209
ENSSSCT00000014922	ENSSSCG00000013658	S1PR2	chr2:69377717-69384593	23.604	38.9505	-0.722613	0.00145	0.017463	23.3054	38.9505	-0.740977	0.001	0.013215
ENSSSCT00000015156	ENSSSCG00000013873	NR2F6	chr2:60095328-60107405	58.692	38.9293	0.592306	0.00315	0.0312883	68.9449	38.9293	0.824586	0.0001	0.00214362
ENSSSCT00000034994	ENSSSCG00000017705	CCL5	chr12:41217456-41228604	20.9757	38.8703	-0.88995	0.01915	0.115089	22.3571	38.8703	-0.797939	0.0239	0.134254
ENSSSCT00000023639	ENSSSCG00000024476	CES3	GL894786.1:9158-19490	62.1891	38.8463	0.678885	0.00175	0.0201145	65.6384	38.8463	0.756761	0.00055	0.00838524
ENSSSCT00000009785	ENSSSCG00000025226	UGT2A3	chr8:70986092-70999583	77.8843	38.3066	1.02374	5e-05	0.00119245	62.8323	38.3066	0.713913	0.00245	0.025797
ENSSSCT00000004538	ENSSSCG00000004103	PCMT1	chr1:18440911-18462186	74.7041	38.2343	0.966319	5e-05	0.00119245	77.1625	38.2343	1.01303	5e-05	0.00119245
ENSSSCT00000002803	ENSSSCG00000002524	AMN	chr7:128896528-128904678	101.693	38.1972	1.41268	5e-05	0.00119245	109.92	38.1972	1.52491	5e-05	0.00119245
ENSSSCT00000018924	ENSSSCG00000017385	PSME3	chr12:20244727-20250334	25.281	38.1813	-0.594815	0.00375	0.0356116	27.9143	38.1813	-0.451861	0.02745	0.147662
ENSSSCT00000004582	ENSSSCG00000004146	REPS1	chr1:28642043-28700509	22.6182	38.0319	-0.749725	0.00035	0.0058827	20.9087	38.0319	-0.863109	5e-05	0.00119245
ENSSSCT00000006798	ENSSSCG00000006203	COPS5	chr4:73801285-73818954	57.7261	37.9988	0.603269	0.0031	0.0308875	59.4994	37.9988	0.64692	0.00155	0.0183734
ENSSSCT00000026504	ENSSSCG00000021410	STRAP	chr5:60006521-60026279	57.6929	37.9731	0.603416	0.0025	0.0262156	61.3752	37.9731	0.692679	0.00055	0.00838524
ENSSSCT00000032475	ENSSSCG00000029168	KIAA0430	GL895057.2:17822-53239	17.1693	37.5922	-1.1306	5e-05	0.00119245	17.9021	37.5922	-1.0703	5e-05	0.00119245
ENSSSCT00000016884	ENSSSCG00000015498	RC3H1	chr9:127846796-127927451	21.1685	37.5585	-0.827219	5e-05	0.00119245	22.3638	37.5585	-0.747973	0.0003	0.00520502
ENSSSCT00000014453	ENSSSCG00000013233	CELF1	chr2:16317461-16327975	23.986	37.5102	-0.645092	0.00205	0.02262	24.6209	37.5102	-0.607399	0.0039	0.0367092
ENSSSCT00000017520	ENSSSCG00000016092	SGO2	chr15:115385276-115417705	22.5765	37.4637	-0.730673	0.0006	0.00895758	20.8672	37.4637	-0.844256	0.0001	0.00214362
ENSSSCT00000006966	ENSSSCG00000006357	FCER1G	chr4:97099149-97103132	15.3579	37.4233	-1.28496	5e-05	0.00119245	13.1077	37.4233	-1.51352	5e-05	0.00119245
ENSSSCT00000006912	ENSSSCG00000006307	RCSD1	chr4:90996956-91079847	21.2532	37.4041	-0.815519	0.0002	0.003754	23.1908	37.4041	-0.689641	0.0018	0.0205452
ENSSSCT00000001190	ENSSSCG00000001094	C6orf62	chr7:20661719-20675397	64.361	37.3175	0.786334	0.0002	0.003754	58.2286	37.3175	0.641876	0.0023	0.0246104
ENSSSCT00000009520	ENSSSCG00000008701	LRPAP1	chr8:1826120-1842703	58.0674	37.1127	0.645817	0.00195	0.0218749	66.0129	37.1127	0.830837	5e-05	0.00119245
ENSSSCT00000031210	ENSSSCG00000024696	CCNYL1	chr15:122430512-122471437	22.5687	37.0229	-0.714095	0.039	0.187575	23.6788	37.0229	-0.644823	0.06575	0.264467
ENSSSCT00000011806	ENSSSCG00000010790	ECHS1	chr14:153776314-153784497	83.6175	37.0154	1.17568	5e-05	0.00119245	105.251	37.0154	1.50764	5e-05	0.00119245
ENSSSCT00000016172	ENSSSCG00000014820	FCHSD2	chr9:8130489-8362269	24.175	36.9957	-0.613842	0.00275	0.0281588	21.1125	36.9957	-0.809264	0.00015	0.00297337
ENSSSCT00000001850	ENSSSCG00000001659	KLC4	chr7:43622082-43634915	60.1143	36.9814	0.700907	0.0006	0.00895758	59.7514	36.9814	0.692171	0.0006	0.00895758
ENSSSCT00000019464	ENSSSCG00000017887	XAF1	chr12:52643900-52658713	101.842	36.9239	1.46371	5e-05	0.00119245	96.5902	36.9239	1.38732	5e-05	0.00119245
ENSSSCT00000003231	ENSSSCG00000002925	POLR2I	chr6:40882878-40894828	22.4737	36.8822	-0.714689	0.0138	0.0909862	22.712	36.8822	-0.699468	0.0162	0.102359
ENSSSCT00000005901	ENSSSCG00000005361	ALDH1B1	chr1:267166210-267167764	64.7071	36.8747	0.811294	5e-05	0.00119245	71.8403	36.8747	0.962164	5e-05	0.00119245
ENSSSCT00000024468	ENSSSCG00000029482	CHST15	chr14:145096699-145179039	13.4025	36.806	-1.45744	5e-05	0.00119245	14.4925	36.806	-1.34464	5e-05	0.00119245
ENSSSCT00000007852	ENSSSCG00000007178	SNRPB	chr17:37461257-37468981	58.4233	36.7712	0.667968	0.0018	0.0205452	72.169	36.7712	0.972803	5e-05	0.00119245
ENSSSCT00000018499	ENSSSCG00000016989	RPL26L1	chr16:55580785-55590313	60.8023	36.6226	0.731392	0.0009	0.0122346	70.3382	36.6226	0.941576	5e-05	0.00119245
ENSSSCT00000008784	ENSSSCG00000008016	MRPS34	chr3:41658024-41659263	77.5583	36.6183	1.08272	5e-05	0.00119245	84.6533	36.6183	1.209	5e-05	0.00119245
ENSSSCT00000019294	ENSSSCG00000017727	TMEM98	chr12:43758791-43771796	89.9415	36.5972	1.29725	5e-05	0.00119245	86.6927	36.5972	1.24418	5e-05	0.00119245
ENSSSCT00000022793	ENSSSCG00000027675	FOXP1	chr13:57861429-58095391	22.6467	36.5753	-0.691565	0.00205	0.02262	20.8379	36.5753	-0.811658	0.0003	0.00520502
ENSSSCT00000014243	ENSSSCG00000013030	PRDX5	chr2:6864026-6867851	103.339	36.3749	1.50637	5e-05	0.00119245	123.57	36.3749	1.76431	5e-05	0.00119245
ENSSSCT00000029383	ENSSSCG00000026877	C12orf57	chr5:66216249-66218190	69.2161	36.3628	0.928643	5e-05	0.00119245	79.1972	36.3628	1.12298	5e-05	0.00119245
ENSSSCT00000002284	ENSSSCG00000002041	SLC7A7	chr7:81441333-81505829	57.558	36.0966	0.673152	0.03605	0.177824	58.0689	36.0966	0.685904	0.0287	0.152552
ENSSSCT00000030385	ENSSSCG00000021309	TRDMT1	GL894963.1:302-8721	16.3445	36.0944	-1.14297	5e-05	0.00119245	14.4385	36.0944	-1.32185	5e-05	0.00119245
ENSSSCT00000007342	ENSSSCG00000006703	PRKAB2	chr4:110207627-110219822	21.5714	36.0568	-0.741151	0.01045	0.0745279	16.6919	36.0568	-1.11112	0.0002	0.003754
ENSSSCT00000034541	ENSSSCG00000011877	CD86	chr13:148057107-148104960	15.761	36.0069	-1.19191	0.00595	0.0497612	14.7433	36.0069	-1.28821	0.00235	0.0250032
ENSSSCT00000001539	ENSSSCG00000001408	AIF1	chr7:27520796-27522927	74.9134	35.9859	1.05779	5e-05	0.00119245	72.4915	35.9859	1.01038	5e-05	0.00119245
ENSSSCT00000009138	ENSSSCG00000008344	ARHGAP25	chr3:77045235-77096424	23.1223	35.9776	-0.637813	0.00195	0.0218749	25.1251	35.9776	-0.517972	0.0123	0.0836743
ENSSSCT00000035022	ENSSSCG00000012435	MAGT1	chrX:70812441-70877254	54.9772	35.93	0.613644	0.03705	0.181345	50.7528	35.93	0.498298	0.09485	0.334334
ENSSSCT00000034190	ENSSSCG00000005969	CU407238.7	chr4:15150017-15246609	20.3384	35.9127	-0.820291	0.00425	0.0390669	19.1101	35.9127	-0.91016	0.0017	0.0196705
ENSSSCT00000016910	ENSSSCG00000015523	RALGPS2	chr9:132310034-132493994	19.5679	35.6282	-0.864534	0.00245	0.025797	19.8455	35.6282	-0.844211	0.00255	0.0266091
ENSSSCT00000013077	ENSSSCG00000011951	NFKBIZ	chr13:166744537-166776678	21.5455	35.5288	-0.7216	0.0056	0.0476499	22.6554	35.5288	-0.649133	0.01055	0.0750904
ENSSSCT00000034002	ENSSSCG00000001414	CSNK2B	chr7:27466071-27474873	10.2754	35.5187	-1.78939	0.0257	0.140817	10.9821	35.5187	-1.69342	0.01665	0.10448
ENSSSCT00000016758	ENSSSCG00000015383	RAPGEF5	chr9:100401756-100601658	21.5534	35.4736	-0.718832	0.00075	0.0106787	22.3017	35.4736	-0.669593	0.00185	0.0209924
ENSSSCT00000029862	ENSSSCG00000024753	ZGPAT	GL896364.1:22654-34364	54.0847	35.3466	0.613649	0.0043	0.0393907	53.292	35.3466	0.592348	0.0067	0.0542606
ENSSSCT00000017066	ENSSSCG00000015668	ORC4	chr15:3748133-3822904	21.7042	35.3084	-0.702034	0.00055	0.00838524	21.972	35.3084	-0.684344	0.001	0.013215
ENSSSCT00000001169	ENSSSCG00000001074	KDM1B	chr7:14591988-14643051	19.903	35.3053	-0.826903	5e-05	0.00119245	20.1238	35.3053	-0.810984	0.0001	0.00214362
ENSSSCT00000001097	ENSSSCG00000001005	PSMG4	chr7:2041197-2048693	83.0265	35.1876	1.23851	5e-05	0.00119245	83.5074	35.1876	1.24684	5e-05	0.00119245
ENSSSCT00000017727	ENSSSCG00000016279	PDE6D	chr15:146142849-146147912	17.5238	35.1852	-1.00565	5e-05	0.00119245	16.3245	35.1852	-1.10793	5e-05	0.00119245
ENSSSCT00000024917	ENSSSCG00000024621	KAT2B	chr13:7991575-8049637	17.549	35.1211	-1.00095	5e-05	0.00119245	15.6421	35.1211	-1.1669	5e-05	0.00119245
ENSSSCT00000001195	ENSSSCG00000001099	CMAH	chr7:21032288-21109183	54.6255	35.1163	0.637433	0.00225	0.0242293	53.5579	35.1163	0.608958	0.0047	0.0419265
ENSSSCT00000028062	ENSSSCG00000029485	FBXO11	chr3:98538853-98709802	18.9553	35.0408	-0.886436	0.0001	0.00214362	18.4421	35.0408	-0.926031	0.0001	0.00214362
ENSSSCT00000016759	ENSSSCG00000015384	TOMM7	chr9:100959711-100968624	108.477	35.0121	1.63146	5e-05	0.00119245	126.546	35.0121	1.85374	5e-05	0.00119245
ENSSSCT00000019512	ENSSSCG00000017929	RNASEK	chr12:54720559-54737521	19.1081	35.0071	-0.873462	0.00865	0.0651238	21.3851	35.0071	-0.71104	0.03365	0.169861
ENSSSCT00000001595	ENSSSCG00000001441	BTNL5	chr7:28095100-28108144	76.9971	34.9334	1.1402	5e-05	0.00119245	65.5041	34.9334	0.906979	5e-05	0.00119245
ENSSSCT00000004641	ENSSSCG00000004200	SMLR1	chr1:36035294-36041273	102.701	34.7824	1.56203	0.0025	0.0262156	147.681	34.7824	2.08606	0.00015	0.00297337
ENSSSCT00000033880	ENSSSCG00000012247	ATP6AP2	chrX:40369353-40398502	76.352	34.7723	1.13473	5e-05	0.00119245	83.2905	34.7723	1.26021	5e-05	0.00119245
ENSSSCT00000030104	ENSSSCG00000020785	DES	chr15:134534142-134587352	176.182	34.6452	2.34634	5e-05	0.00119245	87.4833	34.6452	1.33635	5e-05	0.00119245
ENSSSCT00000014771	ENSSSCG00000013524	C19orf70	chr2:73816821-73818817	68.4358	34.6199	0.983152	5e-05	0.00119245	86.6532	34.6199	1.32365	5e-05	0.00119245
ENSSSCT00000014241	ENSSSCG00000013028	ESRRA	chr2:6867950-6878759	66.0996	34.584	0.93454	0.0001	0.00214362	70.0959	34.584	1.01923	5e-05	0.00119245
ENSSSCT00000033958	ENSSSCG00000015368	HDAC9	chr9:96806465-96960969	14.6086	34.5596	-1.24227	0.00065	0.00953497	13.6104	34.5596	-1.34438	0.00045	0.00719494
ENSSSCT00000014248	ENSSSCG00000013035	PPP1R14B	chr2:6932321-6934762	66.7852	34.4889	0.953397	5e-05	0.00119245	68.4716	34.4889	0.989375	5e-05	0.00119245
ENSSSCT00000005604	ENSSSCG00000005084	PPM1A	chr1:210390698-210401098	51.8059	34.3071	0.594607	0.003	0.0300926	43.5237	34.3071	0.343294	0.09325	0.33079
ENSSSCT00000002698	ENSSSCG00000002429	FOXN3	chr7:117530993-117907020	22.4402	34.2365	-0.609447	0.00205	0.02262	20.5283	34.2365	-0.737917	0.00015	0.00297337
ENSSSCT00000022782	ENSSSCG00000000612	ATF7IP	chr5:61444246-61571485	20.9745	34.2194	-0.706175	0.00165	0.0192591	19.9228	34.2194	-0.780395	0.00045	0.00719494
ENSSSCT00000023744	ENSSSCG00000028623	RARRES1	chr13:106755174-106799382	20.6355	34.1764	-0.727869	0.01585	0.100774	19.7126	34.1764	-0.79388	0.0071	0.0564708
ENSSSCT00000015402	ENSSSCG00000014100	TBCA	chr2:88189091-88203028	67.8328	34.1682	0.98933	5e-05	0.00119245	72.144	34.1682	1.07822	5e-05	0.00119245
ENSSSCT00000004183	ENSSSCG00000003780	CRYZ	chr6:128304888-128327585	57.6835	34.1232	0.757406	0.00045	0.00719494	47.8831	34.1232	0.488764	0.0182	0.11126
ENSSSCT00000005745	ENSSSCG00000005212	PLGRKT	chr1:242425743-242473399	95.8302	33.9896	1.49539	5e-05	0.00119245	112.459	33.9896	1.72624	5e-05	0.00119245
ENSSSCT00000028188	ENSSSCG00000024592	ANKRD17	chr8:73361992-73453165	21.8505	33.9128	-0.634164	0.0025	0.0262156	21.6946	33.9128	-0.644495	0.00235	0.0250032
ENSSSCT00000005449	ENSSSCG00000004938	DENND4A	chr1:181325530-181407125	19.7947	33.7748	-0.77083	0.0003	0.00520502	18.8998	33.7748	-0.837572	0.0001	0.00214362
ENSSSCT00000011681	ENSSSCG00000010680	FAM45A	chr14:140551646-140600229	15.5069	33.7731	-1.12296	5e-05	0.00119245	12.278	33.7731	-1.45979	5e-05	0.00119245
ENSSSCT00000003001	ENSSSCG00000002707	GABARAPL2	chr6:11962959-11973935	75.0311	33.6993	1.15477	5e-05	0.00119245	74.6528	33.6993	1.14748	5e-05	0.00119245
ENSSSCT00000019500	ENSSSCG00000017918	ARRB2	chr12:54281398-54286346	19.7007	33.5934	-0.769932	0.00025	0.00449095	16.6525	33.5934	-1.01244	5e-05	0.00119245
ENSSSCT00000023610	ENSSSCG00000025533	COX7A1	chr6:40921404-40922901	137.94	33.5335	2.04036	5e-05	0.00119245	169.329	33.5335	2.33615	5e-05	0.00119245
ENSSSCT00000003052	ENSSSCG00000002755	NFAT5	chr6:16261576-16381887	18.0849	33.53	-0.890669	5e-05	0.00119245	16.6566	33.53	-1.00936	5e-05	0.00119245
ENSSSCT00000018567	ENSSSCG00000017054	CYFIP2	chr16:71706351-71844164	20.3701	33.5218	-0.718647	0.00145	0.017463	18.349	33.5218	-0.869397	0.0001	0.00214362
ENSSSCT00000031188	ENSSSCG00000029113	RNF219	chr11:55432252-55475980	20.6515	33.4937	-0.697645	0.00065	0.00953497	20.0024	33.4937	-0.743712	0.0002	0.003754
ENSSSCT00000019540	ENSSSCG00000017956	CD68	chr12:55296984-55299524	13.959	33.3292	-1.25559	5e-05	0.00119245	12.7907	33.3292	-1.38169	5e-05	0.00119245
ENSSSCT00000011132	ENSSSCG00000010166	NTPCR	GL894009.1:24581-50551	21.5386	33.1528	-0.622206	0.0044	0.0400203	18.0276	33.1528	-0.878922	5e-05	0.00119245
ENSSSCT00000007996	ENSSSCG00000007308	ROMO1	chr17:44351925-44381550	88.7698	32.9644	1.42916	0.0001	0.00214362	99.6827	32.9644	1.59643	5e-05	0.00119245
ENSSSCT00000013917	ENSSSCG00000012730	AFF2	chrX:138261105-138747171	13.7903	32.9174	-1.2552	5e-05	0.00119245	13.566	32.9174	-1.27886	5e-05	0.00119245
ENSSSCT00000007336	ENSSSCG00000006697	ACP6	chr4:109763759-109781621	49.9851	32.843	0.60591	0.00235	0.0250032	52.5332	32.843	0.677643	0.00075	0.0106787
ENSSSCT00000031333	ENSSSCG00000021409	TRIB1	GL895677.2:20249-26019	15.7511	32.825	-1.05934	0.00035	0.0058827	14.1453	32.825	-1.21447	0.0001	0.00214362
ENSSSCT00000005932	ENSSSCG00000005389	TEX10	chr1:270442972-270480544	15.1716	32.8111	-1.11281	5e-05	0.00119245	14.9076	32.8111	-1.13814	5e-05	0.00119245
ENSSSCT00000001159	ENSSSCG00000001064	GMPR	chr7:12850722-12893472	53.0871	32.8083	0.694301	0.0015	0.0178968	54.0081	32.8083	0.719116	0.00055	0.00838524
ENSSSCT00000007524	ENSSSCG00000006871	SLC35A3	chr4:129725194-129743175	57.2997	32.8073	0.804509	0.00025	0.00449095	59.6184	32.8073	0.861741	0.0001	0.00214362
ENSSSCT00000023054	ENSSSCG00000022155	RBPJ	chr8:20436460-20540775	18.9301	32.7895	-0.792551	5e-05	0.00119245	17.265	32.7895	-0.925379	5e-05	0.00119245
ENSSSCT00000008762	ENSSSCG00000007995	MCRIP2	chr3:41348588-41353426	64.6366	32.7307	0.981708	5e-05	0.00119245	78.2043	32.7307	1.25661	5e-05	0.00119245
ENSSSCT00000012273	ENSSSCG00000011207	SGO1	chr13:8092438-8106544	14.168	32.7236	-1.20769	5e-05	0.00119245	13.0152	32.7236	-1.33013	5e-05	0.00119245
ENSSSCT00000026613	ENSSSCG00000027147	CENPH	chr16:51246711-51272145	21.3651	32.6543	-0.612016	0.00505	0.0442407	18.5625	32.6543	-0.814881	0.00015	0.00297337
ENSSSCT00000019443	ENSSSCG00000017867	EMC6	chr12:51619295-51620159	67.0228	32.5589	1.0416	5e-05	0.00119245	66.7749	32.5589	1.03626	5e-05	0.00119245
ENSSSCT00000029518	ENSSSCG00000028040	C19orf24	chr2:77841362-77844375	50.8031	32.5452	0.642474	0.0035	0.0339068	61.1118	32.5452	0.909007	5e-05	0.00119245
ENSSSCT00000002537	ENSSSCG00000002279	GPX2	chr7:95388197-95392767	20.1631	32.512	-0.689253	0.0061	0.0507239	35.1423	32.512	0.112235	0.63325	0.890251
ENSSSCT00000024426	ENSSSCG00000009967	PITPNB	chr14:48079113-48143499	16.5766	32.5079	-0.971639	0.0016	0.018837	19.6951	32.5079	-0.722957	0.01245	0.0843986
ENSSSCT00000014715	ENSSSCG00000013470	MRPS33	chr18:9410469-9415046	65.9975	32.4247	1.02532	0.00095	0.0127118	62.7041	32.4247	0.951466	0.002	0.0222139
ENSSSCT00000013194	ENSSSCG00000012062	TTC3	chr13:210781583-210875732	19.8188	32.4201	-0.710023	0.00095	0.0127118	20.1418	32.4201	-0.686699	0.00135	0.0165389
ENSSSCT00000024643	ENSSSCG00000024867	ISG20	chr1:212617011-212628410	64.1675	32.334	0.988792	5e-05	0.00119245	60.2836	32.334	0.898715	5e-05	0.00119245
ENSSSCT00000035598	ENSSSCG00000006381	CD84	chr4:97824477-97853630	7.42935	32.2162	-2.11648	5e-05	0.00119245	6.36103	32.2162	-2.34046	0.00025	0.00449095
ENSSSCT00000029108	ENSSSCG00000022866	NXF1	chr2:8315195-8327226	19.3292	32.2107	-0.73676	0.00085	0.0116991	20.0826	32.2107	-0.681598	0.0016	0.018837
ENSSSCT00000007268	ENSSSCG00000006632	SCNM1	chr4:107332626-107335177	20.1316	32.196	-0.677417	0.002	0.0222139	20.2691	32.196	-0.667603	0.0023	0.0246104
ENSSSCT00000014290	ENSSSCG00000013073	FADS3	chr2:9157719-9178637	17.0327	32.1668	-0.91727	0.00015	0.00297337	18.5964	32.1668	-0.790551	0.0002	0.003754
ENSSSCT00000002619	ENSSSCG00000002355	ENTPD5	chr7:103028635-103046142	57.7676	32.1068	0.847383	0.00015	0.00297337	60.6067	32.1068	0.916601	5e-05	0.00119245
ENSSSCT00000028507	ENSSSCG00000027348	WIPF1	chr15:89761502-89836721	15.5232	32.0591	-1.04631	5e-05	0.00119245	13.7547	32.0591	-1.22081	5e-05	0.00119245
ENSSSCT00000011142	ENSSSCG00000010176	C1orf131	chr14:63871597-63919053	16.807	32.001	-0.929051	0.00785	0.060642	16.1103	32.001	-0.990129	0.00775	0.0600435
ENSSSCT00000010066	ENSSSCG00000009193	SMARCAD1	chr8:134696173-134777513	18.3044	31.993	-0.805567	5e-05	0.00119245	18.4268	31.993	-0.795948	5e-05	0.00119245
ENSSSCT00000000189	ENSSSCG00000000180	FKBP11	chr5:15369111-15373235	73.5203	31.8269	1.20789	5e-05	0.00119245	88.3739	31.8269	1.47337	5e-05	0.00119245
ENSSSCT00000025324	ENSSSCG00000023711	ATXN7L3B	chr5:41332679-41333398	56.1341	31.8041	0.819662	5e-05	0.00119245	63.04	31.8041	0.987053	5e-05	0.00119245
ENSSSCT00000015492	ENSSSCG00000014180	ST8SIA4	chr2:110733510-110825901	18.6358	31.7268	-0.767623	0.0002	0.003754	16.3624	31.7268	-0.95532	5e-05	0.00119245
ENSSSCT00000009963	ENSSSCG00000009097	ANXA5	chr8:109609048-109642588	50.6096	31.6518	0.677124	0.00085	0.0116991	52.7736	31.6518	0.73753	0.0003	0.00520502
ENSSSCT00000019524	ENSSSCG00000017940	GPS2	chr3:139940649-139943478	15.0101	31.6137	-1.07462	5e-05	0.00119245	13.2602	31.6137	-1.25344	5e-05	0.00119245
ENSSSCT00000010840	ENSSSCG00000009890	MAPKAPK5	chr14:42329054-42362473	18.5275	31.6075	-0.770597	0.0002	0.003754	17.6704	31.6075	-0.838934	5e-05	0.00119245
ENSSSCT00000016182	ENSSSCG00000014830	COA4	chr9:9067974-9068229	54.431	31.5997	0.784517	0.0459	0.20898	45.5462	31.5997	0.52742	0.1917	0.50906
ENSSSCT00000012170	ENSSSCG00000011120	USP6NL	chr10:66137768-66195086	20.7524	31.5643	-0.605017	0.0023	0.0246104	20.8875	31.5643	-0.595654	0.0026	0.0269681
ENSSSCT00000004990	ENSSSCG00000004518	SKA1	chr1:109665471-109732810	12.0949	31.4162	-1.37711	5e-05	0.00119245	12.2779	31.4162	-1.35545	5e-05	0.00119245
ENSSSCT00000015182	ENSSSCG00000013896	MPV17L2	chr2:59142379-59152443	55.3647	31.3804	0.819103	5e-05	0.00119245	54.7765	31.3804	0.803694	0.0001	0.00214362
ENSSSCT00000011436	ENSSSCG00000010450	LIPA	chr14:110114082-110152331	20.0018	31.3761	-0.649534	0.0014	0.0169856	20.9512	31.3761	-0.582636	0.00335	0.0328264
ENSSSCT00000019058	ENSSSCG00000017505	MED1	chr12:23294148-23322186	16.9785	31.3727	-0.885804	5e-05	0.00119245	16.4348	31.3727	-0.932759	5e-05	0.00119245
ENSSSCT00000014688	ENSSSCG00000013444	BTBD2	chr2:77259221-77264841	47.4748	31.345	0.598925	0.004	0.0373974	47.2107	31.345	0.590875	0.0047	0.0419265
ENSSSCT00000016277	ENSSSCG00000014921	PRSS23	chr9:22903507-22913019	52.0107	31.311	0.732138	0.0003	0.00520502	49.2792	31.311	0.654306	0.0014	0.0169856
ENSSSCT00000008921	ENSSSCG00000008144	NCK2	chr3:51391129-51413776	57.7372	31.3033	0.883185	0.0001	0.00214362	60.3791	31.3033	0.947733	5e-05	0.00119245
ENSSSCT00000000889	ENSSSCG00000000816	SENP1	chr5:81598189-81650808	15.2001	31.2721	-1.0408	5e-05	0.00119245	16.2263	31.2721	-0.946539	5e-05	0.00119245
ENSSSCT00000014518	ENSSSCG00000013293	COMMD9	chr2:27119409-27138704	50.7232	31.2675	0.697981	0.00125	0.015631	49.8635	31.2675	0.673321	0.0012	0.0151808
ENSSSCT00000019634	ENSSSCG00000018039	NCOR1	chr12:62387142-62538681	18.9837	31.1473	-0.714344	0.00695	0.0556722	18.958	31.1473	-0.716301	0.00755	0.0589508
ENSSSCT00000032106	ENSSSCG00000028663	RBM25	chr7:102193921-102258991	17.7508	31.0223	-0.805421	0.0002	0.003754	16.8179	31.0223	-0.883307	0.0001	0.00214362
ENSSSCT00000006909	ENSSSCG00000006304	MPC2	chr4:90745387-90767619	49.3287	31.0212	0.669173	0.00105	0.0137227	54.3252	31.0212	0.808368	0.0001	0.00214362
ENSSSCT00000010422	ENSSSCG00000009505	MBNL2	chr11:73512512-73593285	12.5932	30.6372	-1.28264	5e-05	0.00119245	13.6722	30.6372	-1.16405	5e-05	0.00119245
ENSSSCT00000011020	ENSSSCG00000010059	GUCD1	chr14:53014681-53026872	51.4502	30.6331	0.748084	5e-05	0.00119245	51.9487	30.6331	0.761994	0.0001	0.00214362
ENSSSCT00000015453	ENSSSCG00000014149	MEF2C	chr2:98794387-98885272	37.5795	73.2693	-0.963265	0.00015	0.00297337	33.6784	73.2693	-1.12139	5e-05	0.00119245
ENSSSCT00000008456	ENSSSCG00000007713	WBSCR22	chr3:10656158-10669332	51.4362	30.55	0.751612	0.00015	0.00297337	55.7973	30.55	0.869023	5e-05	0.00119245
ENSSSCT00000033583	ENSSSCG00000006000	TAF2	chr4:20215554-20284818	19.3061	30.5288	-0.661112	0.0016	0.018837	18.1003	30.5288	-0.754153	0.0002	0.003754
ENSSSCT00000012485	ENSSSCG00000011405	HYAL2	chr13:35983755-35988621	48.3184	30.427	0.667221	0.001	0.013215	54.3678	30.427	0.837403	5e-05	0.00119245
ENSSSCT00000028724	ENSSSCG00000026960	ZNF280D	chr1:127597934-127719722	16.0482	30.4102	-0.922146	5e-05	0.00119245	14.488	30.4102	-1.06969	5e-05	0.00119245
ENSSSCT00000009095	ENSSSCG00000008304	PRADC1	chr3:72750854-72755476	50.5229	30.3849	0.733585	0.00045	0.00719494	61.8993	30.3849	1.02657	5e-05	0.00119245
ENSSSCT00000005787	ENSSSCG00000005252	PTAR1	chr1:249446882-249499458	18.0124	30.3115	-0.750875	0.00035	0.0058827	19.0575	30.3115	-0.669508	0.00115	0.01472
ENSSSCT00000030539	ENSSSCG00000030528	LTN1	chr13:202598694-202660919	19.7939	30.2126	-0.610092	0.00415	0.0383737	19.1979	30.2126	-0.654204	0.00235	0.0250032
ENSSSCT00000008432	ENSSSCG00000007691	ZP3	chr3:9837962-9848145	18.4928	30.2105	-0.708089	0.00115	0.01472	27.097	30.2105	-0.15692	0.45005	0.779233
ENSSSCT00000014526	ENSSSCG00000013300	EHF	chr2:28658520-28699570	16.2409	30.1617	-0.893084	5e-05	0.00119245	18.712	30.1617	-0.688748	0.0024	0.0254043
ENSSSCT00000030858	ENSSSCG00000030685	ARID2	chr5:79566480-79726285	19.1159	30.0206	-0.651182	0.0021	0.0230209	18.0984	30.0206	-0.730095	0.0006	0.00895758
ENSSSCT00000012875	ENSSSCG00000011764	NDUFB5	chr13:126750843-126765741	61.2145	29.9834	1.02971	5e-05	0.00119245	73.4082	29.9834	1.29178	5e-05	0.00119245
ENSSSCT00000016687	ENSSSCG00000015314	ANKIB1	chr9:78959289-79055645	18.7433	29.9025	-0.67389	0.0008	0.0111573	17.3438	29.9025	-0.785845	0.0002	0.003754
ENSSSCT00000009928	ENSSSCG00000009063	NDUFC1	chr8:93405710-93410470	128.704	29.8379	2.10883	5e-05	0.00119245	118.224	29.8379	1.9863	5e-05	0.00119245
ENSSSCT00000008776	ENSSSCG00000008008	STUB1	chr3:41382553-41384840	53.7237	29.8183	0.849362	0.0001	0.00214362	54.9672	29.8183	0.882373	5e-05	0.00119245
ENSSSCT00000012540	ENSSSCG00000011459	SELK	chr13:39060224-39067676	52.6788	29.6301	0.830157	0.00025	0.00449095	55.1609	29.6301	0.89658	5e-05	0.00119245
ENSSSCT00000028476	ENSSSCG00000026721	RNASE4	GL892933.2:157543-158192	52.6706	29.6244	0.830213	0.0002	0.003754	61.5504	29.6244	1.05498	5e-05	0.00119245
ENSSSCT00000032321	ENSSSCG00000028758	LBP	chr17:46838033-46868669	10.6246	29.603	-1.47834	5e-05	0.00119245	19.0119	29.603	-0.63884	0.00935	0.0689499
ENSSSCT00000006757	ENSSSCG00000006163	PKIA	chr4:63078475-63181989	17.0292	29.5894	-0.797067	5e-05	0.00119245	16.9984	29.5894	-0.799676	5e-05	0.00119245
ENSSSCT00000016214	ENSSSCG00000014861	MOGAT2	chr9:11119061-11132962	55.601	29.5007	0.914364	5e-05	0.00119245	57.6445	29.5007	0.966436	5e-05	0.00119245
ENSSSCT00000016802	ENSSSCG00000015424	PSMC2	chr9:113971132-113984848	17.6506	29.4758	-0.739812	0.00025	0.00449095	18.7994	29.4758	-0.64884	0.0012	0.0151808
ENSSSCT00000001040	ENSSSCG00000000951	CSRP2	chr5:109453874-109475944	19.5941	29.4187	-0.586311	0.0046	0.0412761	21.4362	29.4187	-0.456683	0.02725	0.146883
ENSSSCT00000032853	ENSSSCG00000012149	RBBP7	chrX:14288823-14312580	2.16028	29.4013	-3.76659	0.0343	0.172124	0.94202	29.4013	-4.96398	0.04105	0.194194
ENSSSCT00000033142	ENSSSCG00000021130	RPP21	chr7:26733856-26735784	18.2142	29.3371	-0.687659	0.021	0.122625	19.7206	29.3371	-0.573026	0.0426	0.198865
ENSSSCT00000009382	ENSSSCG00000008575	ASXL2	chr3:119956163-120169493	19.2917	29.3016	-0.603003	0.00325	0.0320922	19.5078	29.3016	-0.586926	0.0042	0.038713
ENSSSCT00000008062	ENSSSCG00000007366	MYBL2	chr17:51696565-51726535	19.0622	29.291	-0.619743	0.00395	0.0370382	19.2798	29.291	-0.603371	0.00355	0.034246
ENSSSCT00000027285	ENSSSCG00000024972	CCDC25	chr14:12636345-12673718	18.028	29.2526	-0.698324	0.00065	0.00953497	17.4107	29.2526	-0.748596	0.00035	0.0058827
ENSSSCT00000007303	ENSSSCG00000006665	SF3B4	chr4:108590353-108596037	18.9047	29.1818	-0.626323	0.0033	0.0324458	21.9119	29.1818	-0.413353	0.0426	0.198865
ENSSSCT00000008566	ENSSSCG00000007817	IL4R	chr3:19846363-19869474	14.6567	29.0318	-0.98607	0.00075	0.0106787	14.4171	29.0318	-1.00985	0.0007	0.010104
ENSSSCT00000008580	ENSSSCG00000007830	RBBP6	chr3:22536764-22570041	17.2295	28.8997	-0.746173	0.00055	0.00838524	15.3991	28.8997	-0.908205	5e-05	0.00119245
ENSSSCT00000030384	ENSSSCG00000029239	MZB1	chr2:147107911-147110247	60.935	28.8637	1.07801	5e-05	0.00119245	67.7497	28.8637	1.23096	5e-05	0.00119245
ENSSSCT00000012265	ENSSSCG00000011199	TBC1D5	chr13:4512652-4870240	16.1501	28.8635	-0.837702	0.00015	0.00297337	13.8293	28.8635	-1.06152	5e-05	0.00119245
ENSSSCT00000027273	ENSSSCG00000024532	DIMT1	GL896294.1:71933-84715	12.5325	28.6523	-1.19297	5e-05	0.00119245	12.2864	28.6523	-1.22159	5e-05	0.00119245
ENSSSCT00000002109	ENSSSCG00000001884	COMMD4	chr7:62965338-62971658	57.4526	28.6079	1.00596	5e-05	0.00119245	62.5376	28.6079	1.12831	5e-05	0.00119245
ENSSSCT00000032308	ENSSSCG00000024019	GTF2H5	chr1:10901019-10907391	94.63	28.5401	1.72931	5e-05	0.00119245	117.151	28.5401	2.03731	5e-05	0.00119245
ENSSSCT00000014692	ENSSSCG00000013448	MKNK2	chr2:77247529-77254084	43.4911	28.5315	0.608164	0.0037	0.0352729	46.414	28.5315	0.702003	0.0006	0.00895758
ENSSSCT00000000122	ENSSSCG00000000116	POLR2F	chr5:7371777-7384085	44.1136	28.449	0.632845	0.00685	0.0551543	47.3945	28.449	0.736342	0.00185	0.0209924
ENSSSCT00000016981	ENSSSCG00000015588	ANGEL2	chr9:143381056-143398326	18.851	28.4126	-0.591893	0.005	0.043935	18.0035	28.4126	-0.658255	0.00195	0.0218749
ENSSSCT00000027724	ENSSSCG00000030421	GDI1	chrX:143687110-143693195	18.3062	28.3259	-0.629789	0.00185	0.0209924	18.9532	28.3259	-0.579682	0.00465	0.0415674
ENSSSCT00000009443	ENSSSCG00000008631	PQLC3	chr3:134207304-134219635	13.6655	28.2363	-1.04702	5e-05	0.00119245	12.1822	28.2363	-1.21277	5e-05	0.00119245
ENSSSCT00000023385	ENSSSCG00000027971	RFXANK	GL896398.1:4308-11599	42.7135	28.1974	0.599129	0.007	0.0559327	46.0277	28.1974	0.706938	0.0014	0.0169856
ENSSSCT00000028545	ENSSSCG00000027223	THAP1	chr17:12607764-12611975	17.3448	28.1706	-0.699687	0.0017	0.0196705	18.8305	28.1706	-0.581116	0.00635	0.0521455
ENSSSCT00000014534	ENSSSCG00000013308	FBXO3	chr2:29800851-29812316	14.4038	28.0962	-0.96393	5e-05	0.00119245	14.9008	28.0962	-0.914985	5e-05	0.00119245
ENSSSCT00000017959	ENSSSCG00000016495	NDUFB2	chr18:9642904-9654821	59.7336	28.0916	1.0884	5e-05	0.00119245	77.9849	28.0916	1.47306	5e-05	0.00119245
ENSSSCT00000008282	ENSSSCG00000007550	COX19	chr3:758419-762534	46.1734	28.0824	0.717397	0.02955	0.155456	48.1278	28.0824	0.777204	0.02235	0.12818
ENSSSCT00000001012	ENSSSCG00000000927	TMTC3	chr5:99022902-99071007	16.2385	28.0202	-0.787048	0.0002	0.003754	15.9238	28.0202	-0.815285	5e-05	0.00119245
ENSSSCT00000016481	ENSSSCG00000015115	CBL	chr9:51452066-51540892	15.6771	27.9744	-0.835446	5e-05	0.00119245	15.4496	27.9744	-0.856537	5e-05	0.00119245
ENSSSCT00000012777	ENSSSCG00000011672	RASA2	chr13:90125133-90189200	15.7766	27.9444	-0.824772	0.0001	0.00214362	14.1345	27.9444	-0.983342	5e-05	0.00119245
ENSSSCT00000018038	ENSSSCG00000016568	AHCYL2	chr18:20333817-20511321	46.081	27.9398	0.721852	0.0003	0.00520502	53.169	27.9398	0.928266	5e-05	0.00119245
ENSSSCT00000019325	ENSSSCG00000017755	NOS2	chr12:46022453-46053026	15.9006	27.8664	-0.809446	0.00095	0.0127118	11.8619	27.8664	-1.23219	5e-05	0.00119245
ENSSSCT00000009962	ENSSSCG00000009096	EXOSC9	chr8:109462312-109532492	18.3287	27.8148	-0.601752	0.0045	0.0405666	16.5118	27.8148	-0.75236	0.00045	0.00719494
ENSSSCT00000001623	ENSSSCG00000028872	PSMB8	chr7:29425066-29428872	60.7386	27.7768	1.12873	5e-05	0.00119245	50.3016	27.7768	0.856724	0.00175	0.0201145
ENSSSCT00000002982	ENSSSCG00000002689	CMIP	chr6:7183373-7278279	17.9928	27.7629	-0.625736	0.00345	0.0335647	21.7214	27.7629	-0.354043	0.102	0.349749
ENSSSCT00000012501	ENSSSCG00000011421	MANF	chr13:36895067-36899306	41.7143	27.6985	0.590735	0.00615	0.051027	60.9086	27.6985	1.13684	5e-05	0.00119245
ENSSSCT00000000838	ENSSSCG00000000774	USP18	chr5:72536454-72596714	41.9684	27.6405	0.602518	0.01055	0.0750904	49.3503	27.6405	0.836272	0.00015	0.00297337
ENSSSCT00000028182	ENSSSCG00000026959	NPAT	chr9:40632922-40676082	15.2656	27.635	-0.856207	5e-05	0.00119245	14.649	27.635	-0.915697	5e-05	0.00119245
ENSSSCT00000005187	ENSSSCG00000004697	HYPK	chr1:142587864-142589341	44.7681	27.4703	0.704598	0.00145	0.017463	56.755	27.4703	1.04687	5e-05	0.00119245
ENSSSCT00000000434	ENSSSCG00000000402	RBMS2	chr5:23416673-23516564	14.9891	27.4273	-0.871694	0.0001	0.00214362	13.4369	27.4273	-1.02942	5e-05	0.00119245
ENSSSCT00000029926	ENSSSCG00000030467	PHC3	chr13:117558741-117628838	12.6738	27.2715	-1.10554	5e-05	0.00119245	11.6394	27.2715	-1.22838	5e-05	0.00119245
ENSSSCT00000019602	ENSSSCG00000018008	SCO1	chr12:58039026-58056308	47.4869	27.2677	0.800336	0.00025	0.00449095	44.2156	27.2677	0.697364	0.00085	0.0116991
ENSSSCT00000016906	ENSSSCG00000015519	RASAL2	chr9:131679499-132012064	17.6776	27.1197	-0.617419	0.0045	0.0405666	16.4694	27.1197	-0.719552	0.0007	0.010104
ENSSSCT00000005481	ENSSSCG00000004969	KIF23	chr1:185212192-185303450	16.8337	27.1135	-0.687657	0.00075	0.0106787	15.8073	27.1135	-0.778418	0.00015	0.00297337
ENSSSCT00000016350	ENSSSCG00000014987	MMP12	chr9:37420649-37431228	9.02754	27.1032	-1.58606	5e-05	0.00119245	7.19872	27.1032	-1.91265	5e-05	0.00119245
ENSSSCT00000017958	ENSSSCG00000016494	BRAF	chr18:9534502-9629366	13.8705	26.888	-0.954945	5e-05	0.00119245	13.6419	26.888	-0.97892	5e-05	0.00119245
ENSSSCT00000023766	ENSSSCG00000022289	PCDH1	chr2:149690656-149696708	17.4635	26.865	-0.621386	0.0064	0.0524551	19.1349	26.865	-0.489522	0.02885	0.15307
ENSSSCT00000005159	ENSSSCG00000004673	SLC28A2	chr1:141072721-141110102	67.2687	26.8588	1.32454	5e-05	0.00119245	66.4941	26.8588	1.30783	5e-05	0.00119245
ENSSSCT00000018235	ENSSSCG00000016753	POLD2	chr18:55932003-55940472	17.3014	26.7871	-0.63065	0.0033	0.0324458	18.1586	26.7871	-0.560885	0.00635	0.0521455
ENSSSCT00000015194	ENSSSCG00000013908	C19orf60	chr2:59065440-59068526	66.8222	26.646	1.32641	5e-05	0.00119245	70.8832	26.646	1.41152	5e-05	0.00119245
ENSSSCT00000006235	ENSSSCG00000005672	PTPA	chr1:303417951-303447712	46.5333	26.6234	0.805567	5e-05	0.00119245	49.157	26.6234	0.884702	5e-05	0.00119245
ENSSSCT00000006718	ENSSSCG00000006126	DECR1	chr4:51207651-51243981	46.7787	26.5942	0.81474	0.0003	0.00520502	34.9364	26.5942	0.393622	0.05575	0.237739
ENSSSCT00000028296	ENSSSCG00000030507	SMNDC1	chr14:131613230-131627243	16.2587	26.5388	-0.706894	0.00015	0.00297337	14.8473	26.5388	-0.837907	5e-05	0.00119245
ENSSSCT00000023706	ENSSSCG00000028840	EZH2	chr9:120322752-120388808	17.3838	26.5232	-0.60951	0.0031	0.0308875	16.5332	26.5232	-0.681889	0.00095	0.0127118
ENSSSCT00000003059	ENSSSCG00000002762	TERF2	chr6:16552312-16578543	14.1822	26.5045	-0.902152	5e-05	0.00119245	14.8303	26.5045	-0.83769	5e-05	0.00119245
ENSSSCT00000034470	ENSSSCG00000007507	PCK1	chr17:65094782-65100751	51.093	26.4967	0.947316	0.02365	0.133259	45.3542	26.4967	0.775427	0.0625	0.255784
ENSSSCT00000009321	ENSSSCG00000008517	SPAST	chr3:114453799-114512494	16.9172	26.3688	-0.640343	0.00165	0.0192591	15.517	26.3688	-0.764989	0.0002	0.003754
ENSSSCT00000036688	ENSSSCG00000012743	MTMR1	chrX:140009674-140070260	5.64495	26.3385	-2.22214	0.00475	0.0422547	4.40356	26.3385	-2.58043	0.00185	0.0209924
ENSSSCT00000036505	ENSSSCG00000004535	TCF4	chr1:115117720-115215091	15.839	26.3276	-0.733098	0.00255	0.0266091	14.8774	26.3276	-0.823458	0.00095	0.0127118
ENSSSCT00000027816	ENSSSCG00000023369	MSRB1	GL896094.1:3192-7165	63.9619	26.2947	1.28244	5e-05	0.00119245	73.6379	26.2947	1.48568	5e-05	0.00119245
ENSSSCT00000007692	ENSSSCG00000007023	KAT6A	chr17:12487152-12536502	15.6448	26.2853	-0.748571	0.0002	0.003754	15.7283	26.2853	-0.740891	0.00035	0.0058827
ENSSSCT00000019152	ENSSSCG00000024673	NME1	chr12:27484305-27502924	57.6416	26.2815	1.13306	5e-05	0.00119245	74.0087	26.2815	1.49365	5e-05	0.00119245
ENSSSCT00000001895	ENSSSCG00000001696	MRPL14	chr7:44942221-44955752	47.6006	26.2366	0.859398	0.00015	0.00297337	56.6588	26.2366	1.11072	5e-05	0.00119245
ENSSSCT00000019446	ENSSSCG00000017870	NCBP3	chr12:51819596-51850711	15.6913	26.186	-0.73883	0.00015	0.00297337	16.1701	26.186	-0.695464	0.0006	0.00895758
ENSSSCT00000000279	ENSSSCG00000000260	SOAT2	chr5:18773957-18785719	49.5209	26.1469	0.921397	5e-05	0.00119245	53.7607	26.1469	1.03991	5e-05	0.00119245
ENSSSCT00000009651	ENSSSCG00000008821	SLAIN2	chr8:40288823-40365309	14.2221	26.0652	-0.873991	5e-05	0.00119245	14.3367	26.0652	-0.862413	5e-05	0.00119245
ENSSSCT00000005779	ENSSSCG00000005245	FAM122A	chr1:248523792-248524782	12.8791	26.0469	-1.01608	5e-05	0.00119245	15.3726	26.0469	-0.76075	0.00085	0.0116991
ENSSSCT00000011708	ENSSSCG00000010702	PLEKHA1	chr14:143414801-143468369	15.9487	26.0288	-0.706669	0.00095	0.0127118	16.0941	26.0288	-0.693581	0.0011	0.0142222
ENSSSCT00000005209	ENSSSCG00000004717	UBR1	chr1:143205206-143319587	17.1758	25.982	-0.597133	0.0049	0.0433301	17.7614	25.982	-0.548763	0.0118	0.0813015
ENSSSCT00000017097	ENSSSCG00000015697	CCNT2	chr15:19431038-19473796	14.5302	25.8674	-0.832085	5e-05	0.00119245	14.4489	25.8674	-0.840174	5e-05	0.00119245
ENSSSCT00000026305	ENSSSCG00000021802	ABHD17B	chr1:251718070-251759169	46.533	25.8333	0.84902	5e-05	0.00119245	53.2344	25.8333	1.04312	5e-05	0.00119245
ENSSSCT00000031279	ENSSSCG00000029450	HDAC1	chr6:82831192-82921450	9.73028	25.8121	-1.40749	0.00095	0.0127118	11.2341	25.8121	-1.20016	0.0015	0.0178968
ENSSSCT00000003555	ENSSSCG00000003200	NUP62	chr6:50702793-50704392	17.0557	25.7735	-0.595641	0.0041	0.0380764	16.399	25.7735	-0.652286	0.00225	0.0242293
ENSSSCT00000033698	ENSSSCG00000008675	LETM1	chr8:349631-375849	39.869	25.7445	0.631006	0.00135	0.0165389	47.2456	25.7445	0.875916	5e-05	0.00119245
ENSSSCT00000014869	ENSSSCG00000013614	CNN1	chr2:70536386-70544292	102.23	25.7322	1.99017	5e-05	0.00119245	51.9794	25.7322	1.01437	0.0006	0.00895758
ENSSSCT00000006995	ENSSSCG00000006382	SLAMF6	chr4:97870919-97893024	11.0813	25.6964	-1.21344	5e-05	0.00119245	9.50342	25.6964	-1.43505	5e-05	0.00119245
ENSSSCT00000017033	ENSSSCG00000015637	SEC61G	chr9:153348317-153355773	61.271	25.6266	1.25756	5e-05	0.00119245	60.5151	25.6266	1.23965	5e-05	0.00119245
ENSSSCT00000027716	ENSSSCG00000023276	ZNF24	chr6:111620066-111625806	38.7409	25.5277	0.601795	0.0036	0.0345772	37.936	25.5277	0.571505	0.0068	0.054876
ENSSSCT00000030700	ENSSSCG00000021128	HNRNPH2	GL896183.1:86735-88150	39.4765	25.5058	0.630172	0.00375	0.0356116	42.4564	25.5058	0.735158	0.0005	0.00778241
ENSSSCT00000006326	ENSSSCG00000005752	PAEP	chr1:308664852-308669074	16.6997	25.4741	-0.609209	0.01465	0.095043	22.1122	25.4741	-0.204189	0.39175	0.733165
ENSSSCT00000036387	ENSSSCG00000001409	PRRC2A	chr7:27495907-27511694	9.18498	25.4582	-1.47078	5e-05	0.00119245	10.4427	25.4582	-1.28564	0.00215	0.0234086
ENSSSCT00000001963	ENSSSCG00000001757	WDR61	chr7:53195103-53213366	53.874	25.3706	1.08643	5e-05	0.00119245	58.7011	25.3706	1.21023	5e-05	0.00119245
ENSSSCT00000030143	ENSSSCG00000023594	RARRES2	GL892911.1:274865-276565	66.5397	25.2877	1.39578	5e-05	0.00119245	70.3841	25.2877	1.47682	5e-05	0.00119245
ENSSSCT00000012032	ENSSSCG00000010991	AQP3	chr10:37307555-37313382	50.8091	25.2722	1.00753	5e-05	0.00119245	63.3254	25.2722	1.32523	5e-05	0.00119245
ENSSSCT00000010466	ENSSSCG00000009548	ANKRD10	GL893088.1:47292-76078	42.0972	25.0739	0.747534	0.0002	0.003754	48.3443	25.0739	0.947158	5e-05	0.00119245
ENSSSCT00000027267	ENSSSCG00000023325	ACY1	chr13:37310852-37315586	57.5497	25.0654	1.19911	5e-05	0.00119245	61.8531	25.0654	1.30315	5e-05	0.00119245
ENSSSCT00000016365	ENSSSCG00000015001	SLC35F2	chr9:40366109-40418240	42.7252	25.0315	0.771342	0.00035	0.0058827	41.2571	25.0315	0.720897	0.00035	0.0058827
ENSSSCT00000001836	ENSSSCG00000001651	CNPY3	chr7:43463169-43472354	38.267	25.0314	0.612364	0.0021	0.0230209	44.3424	25.0314	0.824947	5e-05	0.00119245
ENSSSCT00000010036	ENSSSCG00000009164	CISD2	chr8:127127661-127138779	55.0755	24.9729	1.14105	5e-05	0.00119245	63.5783	24.9729	1.34817	5e-05	0.00119245
ENSSSCT00000002156	ENSSSCG00000001927	HEXA	chr7:65420489-65455601	43.036	24.9588	0.785998	0.0002	0.003754	45.1928	24.9588	0.856547	5e-05	0.00119245
ENSSSCT00000005555	ENSSSCG00000005039	STYX	chr1:202628099-202674802	11.8155	24.9508	-1.0784	5e-05	0.00119245	13.7468	24.9508	-0.859987	0.00015	0.00297337
ENSSSCT00000006681	ENSSSCG00000006090	MTERF3	chr4:43479297-43578498	16.3905	24.8247	-0.598913	0.0288	0.152894	16.6577	24.8247	-0.575583	0.041	0.194058
ENSSSCT00000013983	ENSSSCG00000012791	NAA10	chrX:142223244-142227530	46.1846	24.7435	0.900364	0.00155	0.0183734	49.725	24.7435	1.00693	0.00035	0.0058827
ENSSSCT00000022765	ENSSSCG00000030305	SLC15A2	chr13:148222429-148259036	15.3452	24.7057	-0.687054	0.00095	0.0127118	17.0014	24.7057	-0.539192	0.0117	0.08083
ENSSSCT00000002101	ENSSSCG00000001876	IMP3	chr7:62712259-62713394	42.3926	24.698	0.779419	0.00015	0.00297337	48.4981	24.698	0.973535	5e-05	0.00119245
ENSSSCT00000002621	ENSSSCG00000002357	ALDH6A1	chr7:103117990-103136318	38.0131	24.6927	0.622411	0.00255	0.0266091	35.4439	24.6927	0.521452	0.0095	0.0697746
ENSSSCT00000010964	ENSSSCG00000010007	MTFP1	chr14:50477197-50480629	38.6353	24.6582	0.647853	0.00265	0.0273669	55.4951	24.6582	1.17029	5e-05	0.00119245
ENSSSCT00000029377	ENSSSCG00000021429	C21orf91	chr13:192505849-192540712	13.7171	24.5726	-0.841081	0.0001	0.00214362	11.2488	24.5726	-1.12728	5e-05	0.00119245
ENSSSCT00000008480	ENSSSCG00000007735	RABGEF1	chr3:16560348-16629075	12.1268	24.5096	-1.01515	5e-05	0.00119245	11.5781	24.5096	-1.08195	5e-05	0.00119245
ENSSSCT00000036000	ENSSSCG00000006375	LY9	chr4:97518819-97546359	13.7145	24.4902	-0.836505	0.00075	0.0106787	11.4846	24.4902	-1.0925	5e-05	0.00119245
ENSSSCT00000006748	ENSSSCG00000006154	PAG1	chr4:60606378-60626273	14.336	24.4307	-0.769055	0.0003	0.00520502	13.7185	24.4307	-0.832577	0.00015	0.00297337
ENSSSCT00000011034	ENSSSCG00000010073	CHCHD10	chr14:53363489-53366597	37.0397	24.3674	0.604117	0.0026	0.0269681	48.4549	24.3674	0.991689	5e-05	0.00119245
ENSSSCT00000019347	ENSSSCG00000017775	TRAF4	chr12:46997167-47000042	36.5606	24.3661	0.585416	0.00495	0.0436516	34.8497	24.3661	0.516273	0.0151	0.0972623
ENSSSCT00000017530	ENSSSCG00000016100	NDUFB3	chr15:116072233-116083825	58.9865	24.3106	1.2788	5e-05	0.00119245	69.4384	24.3106	1.51415	5e-05	0.00119245
ENSSSCT00000008862	ENSSSCG00000008089	CKAP2L	chr3:45411888-45433896	11.0801	24.2953	-1.13271	5e-05	0.00119245	10.7232	24.2953	-1.17994	5e-05	0.00119245
ENSSSCT00000016955	ENSSSCG00000015565	C1orf21	chr9:137972542-138217904	15.3287	24.1746	-0.657251	0.001	0.013215	14.2686	24.1746	-0.760648	0.00015	0.00297337
ENSSSCT00000004337	ENSSSCG00000003922	UROD	chr6:153911565-153915019	38.3688	24.1662	0.666946	0.0011	0.0142222	40.3116	24.1662	0.738206	0.00055	0.00838524
ENSSSCT00000035827	ENSSSCG00000000656	CLEC2B	chr5:64827996-64857595	8.22635	24.1564	-1.55408	5e-05	0.00119245	6.18197	24.1564	-1.96627	5e-05	0.00119245
ENSSSCT00000018466	ENSSSCG00000016957	CD180	chr16:49212320-49229137	12.9213	24.0942	-0.898931	5e-05	0.00119245	12.0357	24.0942	-1.00136	5e-05	0.00119245
ENSSSCT00000010697	ENSSSCG00000009757	BRI3BP	chr14:29888166-29904643	42.7399	23.9916	0.833054	0.00015	0.00297337	65.2091	23.9916	1.44254	5e-05	0.00119245
ENSSSCT00000004358	ENSSSCG00000003940	HYI	chr6:155177960-155210075	62.4277	23.9646	1.38128	5e-05	0.00119245	63.9846	23.9646	1.41682	5e-05	0.00119245
ENSSSCT00000005070	ENSSSCG00000004589	RNF111	chr1:124961866-125109541	14.2689	23.9297	-0.745933	0.0002	0.003754	14.2635	23.9297	-0.746479	0.00055	0.00838524
ENSSSCT00000035656	ENSSSCG00000001439	GPSM3	chr7:28048459-28050665	13.6248	23.7544	-0.801958	0.00065	0.00953497	12.262	23.7544	-0.954007	5e-05	0.00119245
ENSSSCT00000003120	ENSSSCG00000002820	RSPRY1	chr6:17159490-17195722	14.0541	23.7347	-0.756005	0.00015	0.00297337	14.7572	23.7347	-0.685581	0.0006	0.00895758
ENSSSCT00000010028	ENSSSCG00000009157	TET2	chr8:125011419-125136835	14.983	23.6569	-0.65894	0.0014	0.0169856	12.9646	23.6569	-0.867685	5e-05	0.00119245
ENSSSCT00000028499	ENSSSCG00000026596	SYNRG	chr12:40620837-40711558	15.342	23.5985	-0.621214	0.0021	0.0230209	15.2861	23.5985	-0.626473	0.0018	0.0205452
ENSSSCT00000019107	ENSSSCG00000017553	KAT7	chr12:25975256-26009289	15.2854	23.5938	-0.626256	0.00205	0.02262	15.2369	23.5938	-0.630835	0.0022	0.0238111
ENSSSCT00000036004	ENSSSCG00000010056	GGT1	chr14:53061850-53079992	54.0026	23.5233	1.19894	0.0089	0.0663967	67.2595	23.5233	1.51565	0.00135	0.0165389
ENSSSCT00000016650	ENSSSCG00000015279	GOLT1A	chr9:71175790-71179145	57.1002	23.4651	1.28298	5e-05	0.00119245	58.7114	23.4651	1.32312	5e-05	0.00119245
ENSSSCT00000034589	ENSSSCG00000026173	ABCA1	chr1:275474264-275507927	13.6929	23.4612	-0.77685	0.00075	0.0106787	11.1562	23.4612	-1.07243	5e-05	0.00119245
ENSSSCT00000007189	ENSSSCG00000006562	GATAD2B	chr4:104700116-104761145	10.791	23.4143	-1.11756	5e-05	0.00119245	10.5405	23.4143	-1.15144	5e-05	0.00119245
ENSSSCT00000003983	ENSSSCG00000003588	SRSF4	chr6:79952182-79980058	11.6304	23.3068	-1.00285	5e-05	0.00119245	12.6629	23.3068	-0.88014	5e-05	0.00119245
ENSSSCT00000004729	ENSSSCG00000004279	OGFRL1	chr1:57650075-57663843	13.0155	23.2237	-0.835366	5e-05	0.00119245	13.4689	23.2237	-0.785959	0.0001	0.00214362
ENSSSCT00000005825	ENSSSCG00000005288	TLE4	chr1:259252401-259399473	15.4344	23.1897	-0.587337	0.0059	0.0494723	13.9614	23.1897	-0.732041	0.0006	0.00895758
ENSSSCT00000012861	ENSSSCG00000011750	PLD1	chr13:119143380-119362303	38.9883	23.1636	0.751182	0.00055	0.00838524	45.966	23.1636	0.988707	5e-05	0.00119245
ENSSSCT00000003006	ENSSSCG00000002712	LDHD	chr6:12295490-12298450	44.1327	23.155	0.930522	5e-05	0.00119245	34.8665	23.155	0.590514	0.0038	0.035985
ENSSSCT00000017395	ENSSSCG00000015976	LNPK	chr15:91041839-91116915	14.663	23.0371	-0.651774	0.00185	0.0209924	14.3801	23.0371	-0.679887	0.0014	0.0169856
ENSSSCT00000024163	ENSSSCG00000021010	TMEM219	GL894417.1:8139-14604	36.6282	23.0126	0.670531	0.00205	0.02262	40.2888	23.0126	0.807954	0.00015	0.00297337
ENSSSCT00000012888	ENSSSCG00000011776	YEATS2	chr13:131074736-131180554	12.7067	22.8122	-0.844217	5e-05	0.00119245	12.3812	22.8122	-0.881652	5e-05	0.00119245
ENSSSCT00000027972	ENSSSCG00000022227	BRD4	chr2:61827881-61924756	9.9364	22.6923	-1.19141	5e-05	0.00119245	10.208	22.6923	-1.1525	5e-05	0.00119245
ENSSSCT00000014540	ENSSSCG00000013314	QSER1	chr2:30443548-30531265	13.5422	22.6131	-0.739692	0.0005	0.00778241	12.6394	22.6131	-0.839228	5e-05	0.00119245
ENSSSCT00000014757	ENSSSCG00000013510	UBXN6	chr2:74857835-74871562	40.6379	22.6116	0.845765	0.0001	0.00214362	39.2897	22.6116	0.79709	5e-05	0.00119245
ENSSSCT00000017880	ENSSSCG00000016420	INSIG1	chr18:2896504-3019640	36.4199	22.5745	0.690033	0.00065	0.00953497	51.962	22.5745	1.20276	5e-05	0.00119245
ENSSSCT00000007188	ENSSSCG00000006561	SLC39A1	chr4:104630731-104635140	35.1942	22.5744	0.640648	0.0013	0.0160896	35.6828	22.5744	0.660539	0.0009	0.0122346
ENSSSCT00000036241	ENSSSCG00000000907	PLXNC1	chr5:93325751-93529504	4.91071	22.5505	-2.19916	0.0311	0.160847	4.69645	22.5505	-2.26352	0.0249	0.138006
ENSSSCT00000027876	ENSSSCG00000020962	DYNLL2	chr12:35383128-35390288	38.0278	22.5248	0.755543	0.0001	0.00214362	36.8851	22.5248	0.711525	0.00055	0.00838524
ENSSSCT00000018080	ENSSSCG00000016607	NDUFA5	chr18:25478939-25493050	37.2423	22.5081	0.726497	0.00095	0.0127118	37.0611	22.5081	0.719463	0.001	0.013215
ENSSSCT00000001102	ENSSSCG00000001010	WRNIP1	chr7:1756547-1766944	34.0853	22.4693	0.601196	0.0035	0.0339068	36.508	22.4693	0.700257	0.0007	0.010104
ENSSSCT00000012728	ENSSSCG00000011631	UBA5	chr13:81528677-81538664	39.9415	22.4635	0.830304	0.0001	0.00214362	37.7225	22.4635	0.747843	0.00045	0.00719494
ENSSSCT00000002388	ENSSSCG00000002135	PNP	chr7:83454639-83459911	36.9712	22.4463	0.719922	0.0008	0.0111573	66.7302	22.4463	1.57186	5e-05	0.00119245
ENSSSCT00000023239	ENSSSCG00000025293	HLTF	chr13:97254691-97326859	13.4988	22.4243	-0.732227	0.00025	0.00449095	13.5812	22.4243	-0.723452	0.00035	0.0058827
ENSSSCT00000014249	ENSSSCG00000013036	FKBP2	chr2:6935188-6936674	60.3131	22.3416	1.43274	5e-05	0.00119245	60.0714	22.3416	1.42695	5e-05	0.00119245
ENSSSCT00000006665	ENSSSCG00000006074	STK3	chr4:41016202-41229161	13.542	22.2968	-0.719393	0.0008	0.0111573	12.914	22.2968	-0.787902	0.00025	0.00449095
ENSSSCT00000017635	ENSSSCG00000016194	USP37	chr15:133512790-133595116	12.4524	22.2168	-0.835222	5e-05	0.00119245	11.7899	22.2168	-0.914094	5e-05	0.00119245
ENSSSCT00000025069	ENSSSCG00000023396	LIX1	chr2:107545791-107624525	8.70192	22.1022	-1.34478	5e-05	0.00119245	12.0113	22.1022	-0.879798	0.0001	0.00214362
ENSSSCT00000000174	ENSSSCG00000000165	MTERF2	chr5:13226839-13227997	12.6884	22.0677	-0.798424	0.0005	0.00778241	13.1765	22.0677	-0.743969	0.00115	0.01472
ENSSSCT00000007833	ENSSSCG00000007160	DDRGK1	chr17:36851070-36862512	38.4973	22.0084	0.806701	0.0001	0.00214362	35.7558	22.0084	0.700123	0.0012	0.0151808
ENSSSCT00000014144	ENSSSCG00000012939	BRMS1	chr2:5122631-5130266	34.4104	21.9365	0.649511	0.0016	0.018837	33.6092	21.9365	0.615523	0.00285	0.029011
ENSSSCT00000018728	ENSSSCG00000017203	GALK1	chr12:5588391-5597606	47.4661	21.9298	1.114	5e-05	0.00119245	49.1265	21.9298	1.16361	5e-05	0.00119245
ENSSSCT00000031697	ENSSSCG00000025980	CHMP4C	chr4:60005443-60016407	34.0889	21.8169	0.643856	0.0017	0.0196705	30.1448	21.8169	0.466465	0.02255	0.128912
ENSSSCT00000010315	ENSSSCG00000009414	ZC3H13	chr11:21758293-21840037	13.8088	21.8062	-0.65915	0.0009	0.0122346	13.737	21.8062	-0.666666	0.0006	0.00895758
ENSSSCT00000010866	ENSSSCG00000009916	ACADS	chr14:43110574-43124766	41.7098	21.8018	0.935937	5e-05	0.00119245	42.5907	21.8018	0.966087	5e-05	0.00119245
ENSSSCT00000005721	ENSSSCG00000005190	NFIB	chr1:231958096-232191301	11.603	21.7154	-0.904224	0.0001	0.00214362	11.425	21.7154	-0.926525	5e-05	0.00119245
ENSSSCT00000010116	ENSSSCG00000009237	HPSE	chr8:144378354-144424495	12.7902	21.6948	-0.762307	0.0007	0.010104	11.4159	21.6948	-0.926306	5e-05	0.00119245
ENSSSCT00000025953	ENSSSCG00000027455	SLC39A6	chr6:112388517-112409117	12.8429	21.6777	-0.755247	0.0003	0.00520502	14.3312	21.6777	-0.597049	0.0038	0.035985
ENSSSCT00000004804	ENSSSCG00000004347	FBXL4	chr1:74422358-74484868	34.2187	21.6296	0.661782	0.0017	0.0196705	23.961	21.6296	0.147683	0.48085	0.801296
ENSSSCT00000025142	ENSSSCG00000009779	MPHOSPH9	chr14:31362376-31416450	10.5845	21.4835	-1.02127	0.0001	0.00214362	9.99992	21.4835	-1.10324	0.0001	0.00214362
ENSSSCT00000014305	ENSSSCG00000013087	TKFC	chr2:9705514-9717302	38.9132	21.4641	0.858333	5e-05	0.00119245	53.2017	21.4641	1.30955	5e-05	0.00119245
ENSSSCT00000008158	ENSSSCG00000007454	ZMYND8	chr17:55169857-55282539	13.2316	21.4278	-0.695492	0.0008	0.0111573	13.6972	21.4278	-0.645596	0.0016	0.018837
ENSSSCT00000025457	ENSSSCG00000028821	SASS6	GL893374.2:641-17824	13.1221	21.3924	-0.705101	0.00065	0.00953497	12.3347	21.3924	-0.794379	0.00025	0.00449095
ENSSSCT00000023179	ENSSSCG00000024418	RHOU	chr14:65508297-65517687	36.7636	21.3922	0.781195	0.00035	0.0058827	38.2068	21.3922	0.836744	0.0001	0.00214362
ENSSSCT00000011586	ENSSSCG00000010592	AS3MT	chr14:123816084-123835880	32.9711	21.3818	0.62482	0.00385	0.0363563	37.0342	21.3818	0.792475	0.0002	0.003754
ENSSSCT00000018066	ENSSSCG00000016593	ARF5	chr18:21699124-21702395	36.9338	21.2702	0.79611	0.00025	0.00449095	34.0917	21.2702	0.680591	0.001	0.013215
ENSSSCT00000005538	ENSSSCG00000005022	NIN	chr1:200774576-200871792	13.8008	21.172	-0.617406	0.0029	0.0293426	12.8759	21.172	-0.717484	0.00035	0.0058827
ENSSSCT00000013042	ENSSSCG00000011918	USF3	chr13:155815449-155865635	4.68556	21.1572	-2.17486	5e-05	0.00119245	6.36773	21.1572	-1.7323	0.00105	0.0137227
ENSSSCT00000011325	ENSSSCG00000010345	GHITM	chr14:92190362-92207964	39.4675	21.1177	0.90221	5e-05	0.00119245	46.7194	21.1177	1.14557	5e-05	0.00119245
ENSSSCT00000005777	ENSSSCG00000005243	PGM5	chr1:247961313-248144476	35.9944	21.1128	0.769655	0.00105	0.0137227	25.9208	21.1128	0.295995	0.1691	0.474591
ENSSSCT00000008202	ENSSSCG00000007493	AURKA	chr17:64066366-64083610	11.0933	21.0901	-0.926878	0.04825	0.216066	4.40017	21.0901	-2.26094	0.01275	0.0859406
ENSSSCT00000006362	ENSSSCG00000005786	SNRPA1	chr1:311632781-311644920	36.0852	21.0491	0.777649	0.0003	0.00520502	37.728	21.0491	0.841875	5e-05	0.00119245
ENSSSCT00000003550	ENSSSCG00000003195	PNKP	chr6:50603437-50609894	36.6	21.0469	0.798235	5e-05	0.00119245	35.6654	21.0469	0.760915	0.00015	0.00297337
ENSSSCT00000018330	ENSSSCG00000016835	SKP2	chr16:22479821-22519334	11.5653	21.0191	-0.861892	5e-05	0.00119245	12.0985	21.0191	-0.796876	0.00025	0.00449095
ENSSSCT00000026469	ENSSSCG00000021940	CYP2J34	chr6:139902193-139929805	46.7027	20.9844	1.15419	5e-05	0.00119245	34.8225	20.9844	0.730706	0.0009	0.0122346
ENSSSCT00000012622	ENSSSCG00000011532	SUMF1	chr13:67255360-67345922	37.7934	20.9431	0.85166	5e-05	0.00119245	40.1379	20.9431	0.938492	5e-05	0.00119245
ENSSSCT00000028688	ENSSSCG00000026931	SERTAD1	chr6:44447546-44448266	39.9659	20.9052	0.934906	0.0001	0.00214362	57.9017	20.9052	1.46974	5e-05	0.00119245
ENSSSCT00000003084	ENSSSCG00000002786	ELMO3	chr6:25131024-25135710	31.8006	20.8113	0.611688	0.003	0.0300926	28.0918	20.8113	0.432784	0.03455	0.172809
ENSSSCT00000027040	ENSSSCG00000024529	TRMT5	chr1:211196362-211293975	11.7648	20.7811	-0.820799	0.0021	0.0230209	11.5007	20.7811	-0.85355	0.0017	0.0196705
ENSSSCT00000022310	ENSSSCG00000027526	MAN1B1	GL896485.1:1293-9878	36.2783	20.7653	0.804935	5e-05	0.00119245	40.1912	20.7653	0.952705	5e-05	0.00119245
ENSSSCT00000014560	ENSSSCG00000013332	KIF18A	chr2:34827411-34906171	13.7888	20.7412	-0.589	0.005	0.043935	13.6001	20.7412	-0.608883	0.0042	0.038713
ENSSSCT00000012132	ENSSSCG00000011085	MLLT10	chr10:58734841-58937014	13.6657	20.7296	-0.601135	0.00275	0.0281588	14.0622	20.7296	-0.559873	0.00565	0.0479669
ENSSSCT00000006980	ENSSSCG00000006370	TSTD1	chr4:97371109-97372691	59.9421	20.7015	1.53383	5e-05	0.00119245	69.9295	20.7015	1.75616	5e-05	0.00119245
ENSSSCT00000009270	ENSSSCG00000008468	PKDCC	chr3:104399302-104408929	33.5361	20.686	0.697064	0.001	0.013215	32.0089	20.686	0.629823	0.00205	0.02262
ENSSSCT00000000142	ENSSSCG00000000136	CSF2RB	chr5:8415794-8440059	10.0977	20.6847	-1.03454	5e-05	0.00119245	10.6142	20.6847	-0.962568	5e-05	0.00119245
ENSSSCT00000002946	ENSSSCG00000002655	MAP1LC3B	chr6:2007808-2029003	35.0018	20.6496	0.761312	0.00015	0.00297337	39.0074	20.6496	0.917634	5e-05	0.00119245
ENSSSCT00000012010	ENSSSCG00000010973	RPP25L	chr10:36330147-36331804	42.8206	20.5666	1.05801	5e-05	0.00119245	45.4003	20.5666	1.1424	5e-05	0.00119245
ENSSSCT00000003573	ENSSSCG00000003217	JOSD2	chr6:51185526-51189977	36.1102	20.5519	0.813133	0.0001	0.00214362	34.903	20.5519	0.764078	0.00045	0.00719494
ENSSSCT00000006840	ENSSSCG00000006242	IMPAD1	chr4:82110549-82130274	34.6843	20.5124	0.757791	0.0002	0.003754	38.4864	20.5124	0.907855	5e-05	0.00119245
ENSSSCT00000035117	ENSSSCG00000012278	CFP	chrX:47326118-47335184	1.47652	20.3968	-3.78807	0.01715	0.106666	1.3494	20.3968	-3.91795	0.013	0.0871757
ENSSSCT00000003161	ENSSSCG00000002860	PDCD5	chr6:37992730-38001169	33.2694	20.2936	0.713174	0.00115	0.01472	35.8648	20.2936	0.821545	0.0005	0.00778241
ENSSSCT00000005811	ENSSSCG00000005276	RFK	chr1:256085362-256092237	41.1418	20.2829	1.02034	5e-05	0.00119245	45.3101	20.2829	1.15957	5e-05	0.00119245
ENSSSCT00000002073	ENSSSCG00000001850	ARPIN	chr7:60355192-60367709	30.6685	20.279	0.596771	0.00595	0.0497612	30.718	20.279	0.5991	0.005	0.043935
ENSSSCT00000008422	ENSSSCG00000007681	CUX1	chr3:9324577-9427775	12.2379	20.2565	-0.727032	0.0004	0.00655605	12.1294	20.2565	-0.739881	0.0005	0.00778241
ENSSSCT00000030503	ENSSSCG00000028696	FEN1	chr2:9244352-9245495	35.5817	20.2274	0.814824	0.0001	0.00214362	44.0739	20.2274	1.12361	5e-05	0.00119245
ENSSSCT00000009821	ENSSSCG00000008966	PARM1	chr8:75007834-75040223	8.56748	20.215	-1.23848	5e-05	0.00119245	9.55157	20.215	-1.08162	5e-05	0.00119245
ENSSSCT00000023854	ENSSSCG00000021464	SOAT1	chr9:132894168-132952061	12.6351	20.1497	-0.673317	0.00115	0.01472	12.004	20.1497	-0.747242	0.00045	0.00719494
ENSSSCT00000012370	ENSSSCG00000011299	CLEC3B	chr13:31097019-31106760	41.5112	20.13	1.04415	5e-05	0.00119245	41.2938	20.13	1.03658	5e-05	0.00119245
ENSSSCT00000001463	ENSSSCG00000001347	PPP1R10	chr7:26818441-26835304	11.328	20.1115	-0.82813	0.0013	0.0160896	14.476	20.1115	-0.474363	0.04805	0.215487
ENSSSCT00000029629	ENSSSCG00000027849	CNR2	chr6:75364735-75365818	10.8972	20.1015	-0.883342	0.0002	0.003754	11.0897	20.1015	-0.858083	0.00025	0.00449095
ENSSSCT00000018518	ENSSSCG00000017006	LCP2	chr16:58039299-58082197	10.4317	20.0178	-0.940308	5e-05	0.00119245	8.0918	20.0178	-1.30675	5e-05	0.00119245
ENSSSCT00000022635	ENSSSCG00000026748	PLK1	GL892917.1:19278-29566	12.5355	20.0113	-0.67479	0.00205	0.02262	13.2123	20.0113	-0.598936	0.00535	0.0461548
ENSSSCT00000003090	ENSSSCG00000002790	TMEM208	chr6:25096844-25107156	48.5527	19.9965	1.2798	0.00035	0.0058827	58.7442	19.9965	1.5547	5e-05	0.00119245
ENSSSCT00000025743	ENSSSCG00000024089	C5orf30	chr2:112821400-112822024	36.2223	19.9887	0.857695	0.0005	0.00778241	32.7832	19.9887	0.713772	0.00375	0.0356116
ENSSSCT00000013251	ENSSSCG00000012114	MSL3	chrX:9292635-9308558	11.8584	19.906	-0.747291	0.01325	0.0884628	10.1612	19.906	-0.970134	0.00165	0.0192591
ENSSSCT00000005524	ENSSSCG00000005008	POLE2	chr1:199881761-199916187	10.0718	19.8541	-0.979119	5e-05	0.00119245	10.0291	19.8541	-0.985243	5e-05	0.00119245
ENSSSCT00000033034	ENSSSCG00000012534	MORF4L2	chrX:98342575-98355097	47.1562	19.8438	1.24876	0.04715	0.212794	54.7762	19.8438	1.46486	0.0264	0.143681
ENSSSCT00000002206	ENSSSCG00000001973	SCFD1	chr7:73405793-73475775	29.7704	19.8207	0.586869	0.0048	0.0426166	29.2447	19.8207	0.561165	0.00715	0.0567486
ENSSSCT00000004696	ENSSSCG00000004249	CEP85L	chr1:48621906-48789033	11.2216	19.7573	-0.816105	0.00045	0.00719494	11.8783	19.7573	-0.73406	0.00065	0.00953497
ENSSSCT00000004903	ENSSSCG00000004438	TSPYL1	chr1:92023735-92025046	30.6433	19.7317	0.635058	0.0029	0.0293426	29.6389	19.7317	0.586977	0.00565	0.0479669
ENSSSCT00000018449	ENSSSCG00000016941	RNF180	chr16:45789517-46030971	13.0559	19.7228	-0.595162	0.0048	0.0426166	13.3007	19.7228	-0.568363	0.00845	0.0640856
ENSSSCT00000024525	ENSSSCG00000023495	PITHD1	chr6:75427943-75436070	29.7835	19.7057	0.595901	0.00395	0.0370382	29.1133	19.7057	0.563064	0.00615	0.051027
ENSSSCT00000008129	ENSSSCG00000007426	ACOT8	chr17:53679780-53719362	33.2106	19.6775	0.755095	0.0045	0.0405666	35.0555	19.6775	0.833091	0.0023	0.0246104
ENSSSCT00000036028	ENSSSCG00000012163	RPS6KA3	chrX:17723476-17833484	9.17022	19.51	-1.08919	0.02985	0.156558	11.2079	19.51	-0.799697	0.0977	0.340442
ENSSSCT00000017206	ENSSSCG00000015801	TLR3	chr15:53840782-53852536	11.7177	19.4614	-0.731935	0.00875	0.0656296	12.1784	19.4614	-0.676291	0.02165	0.125266
ENSSSCT00000017053	ENSSSCG00000015656	FCMR	chr9:73987479-74000900	9.67935	19.3872	-1.00212	5e-05	0.00119245	8.70826	19.3872	-1.15465	5e-05	0.00119245
ENSSSCT00000015340	ENSSSCG00000014043	RAB24	chr2:82220163-82222343	34.8437	19.3869	0.845819	5e-05	0.00119245	39.1754	19.3869	1.01487	5e-05	0.00119245
ENSSSCT00000011268	ENSSSCG00000010295	ECD	chr14:82047990-82081641	11.3544	19.3585	-0.76971	0.0003	0.00520502	11.5247	19.3585	-0.748235	0.0004	0.00655605
ENSSSCT00000006421	ENSSSCG00000005842	TMEM141	chr1:313876994-313878962	48.4874	19.3395	1.32606	5e-05	0.00119245	48.8281	19.3395	1.33616	5e-05	0.00119245
ENSSSCT00000007838	ENSSSCG00000007165	MRPS26	chr17:36999750-37002049	41.295	19.2514	1.101	5e-05	0.00119245	48.8869	19.2514	1.34449	5e-05	0.00119245
ENSSSCT00000013834	ENSSSCG00000012653	ZDHHC9	chrX:122170147-122205078	8.66193	19.1844	-1.14717	0.0192	0.115281	10.2925	19.1844	-0.898338	0.04005	0.190974
ENSSSCT00000004271	ENSSSCG00000003859	ZCCHC11	chr6:147320007-147467617	10.8487	19.1715	-0.821445	0.00015	0.00297337	9.39839	19.1715	-1.02848	5e-05	0.00119245
ENSSSCT00000014583	ENSSSCG00000013352	E2F8	chr2:43158559-43173664	9.90019	19.164	-0.952871	5e-05	0.00119245	9.68896	19.164	-0.983986	5e-05	0.00119245
ENSSSCT00000003785	ENSSSCG00000003412	EXOSC10	chr6:65163742-65187263	12.5762	19.1492	-0.606585	0.0024	0.0254043	12.4398	19.1492	-0.622318	0.00205	0.02262
ENSSSCT00000009186	ENSSSCG00000008389	PAPOLG	chr3:85082447-85116899	10.5021	19.1258	-0.864835	5e-05	0.00119245	11.255	19.1258	-0.764947	0.0004	0.00655605
ENSSSCT00000026721	ENSSSCG00000022149	RMI2	chr3:32597547-32604750	11.7583	19.1185	-0.701283	0.00075	0.0106787	12.492	19.1185	-0.613965	0.00255	0.0266091
ENSSSCT00000011433	ENSSSCG00000010448	FAS	chr14:109911957-109939489	11.263	19.0862	-0.760945	0.00025	0.00449095	8.86748	19.0862	-1.10593	5e-05	0.00119245
ENSSSCT00000010853	ENSSSCG00000009903	COQ5	chr14:42936357-42953347	30.9631	19.0794	0.69853	0.00085	0.0116991	30.1003	19.0794	0.657761	0.00215	0.0234086
ENSSSCT00000015430	ENSSSCG00000014126	MSH3	chr2:91102263-91281987	11.8268	19.0334	-0.686475	0.00095	0.0127118	11.3841	19.0334	-0.741508	0.0001	0.00214362
ENSSSCT00000008223	ENSSSCG00000007508	ZBP1	chr17:65136535-65146713	39.5973	18.9792	1.06099	5e-05	0.00119245	39.6426	18.9792	1.06264	5e-05	0.00119245
ENSSSCT00000017550	ENSSSCG00000016119	RAPH1	chr15:118236246-118297755	9.77771	18.9156	-0.952008	5e-05	0.00119245	10.7807	18.9156	-0.811119	0.0001	0.00214362
ENSSSCT00000027366	ENSSSCG00000024567	PTPRH	chr6:54259283-54275891	40.2986	18.8869	1.09335	5e-05	0.00119245	56.6493	18.8869	1.58468	5e-05	0.00119245
ENSSSCT00000010435	ENSSSCG00000009517	GPR183	chr11:75379203-75555916	10.1389	18.8573	-0.895225	0.0053	0.0458347	8.86149	18.8573	-1.0895	0.0008	0.0111573
ENSSSCT00000008144	ENSSSCG00000007440	CD40	chr17:53931893-53943334	10.8095	18.8063	-0.798916	0.01515	0.0975058	8.43052	18.8063	-1.15752	0.0047	0.0419265
ENSSSCT00000011362	ENSSSCG00000010380	MAPK8	chr14:96724943-96798725	21.0525	12.6966	0.729544	0.00125	0.015631	21.908	12.6966	0.787009	0.00115	0.01472
ENSSSCT00000007605	ENSSSCG00000006941	DDAH1	chr4:143171683-143206264	10.9084	18.7981	-0.785155	0.0075	0.0586606	12.5187	18.7981	-0.5865	0.03895	0.187391
ENSSSCT00000004988	ENSSSCG00000004516	MBD1	chr1:109591050-109606006	32.0493	18.7602	0.772615	0.00025	0.00449095	27.9102	18.7602	0.573115	0.00405	0.0377656
ENSSSCT00000030369	ENSSSCG00000022222	MTX2	chr15:91528900-91635858	29.5293	18.759	0.654568	0.00225	0.0242293	34.7968	18.759	0.891373	5e-05	0.00119245
ENSSSCT00000011534	ENSSSCG00000010543	ABCC2	chr14:120400795-120478568	32.8578	18.7483	0.809474	0.0003	0.00520502	36.9447	18.7483	0.978605	5e-05	0.00119245
ENSSSCT00000005226	ENSSSCG00000004730	TMEM87A	chr1:143990773-144034566	29.7799	18.6617	0.674259	0.00125	0.015631	28.7847	18.6617	0.625219	0.0024	0.0254043
ENSSSCT00000004159	ENSSSCG00000003757	SSX2IP	chr6:119537763-119566620	11.5421	18.6361	-0.691197	0.00195	0.0218749	11.7118	18.6361	-0.670134	0.00205	0.02262
ENSSSCT00000011836	ENSSSCG00000010819	SLC30A10	chr10:11615849-11627111	40.1892	18.6337	1.1089	5e-05	0.00119245	30.1343	18.6337	0.693497	0.0015	0.0178968
ENSSSCT00000009552	ENSSSCG00000008732	TMEM128	chr8:5751452-5761789	35.1494	18.608	0.917578	0.0001	0.00214362	33.2584	18.608	0.837794	0.0003	0.00520502
ENSSSCT00000001708	ENSSSCG00000001533	TAF11	chr7:35543523-35555308	29.6067	18.6034	0.670358	0.00155	0.0183734	32.0383	18.6034	0.78423	0.00045	0.00719494
ENSSSCT00000022668	ENSSSCG00000021750	MEX3D	chr2:78141927-78150406	33.7666	18.5556	0.863742	5e-05	0.00119245	35.3447	18.5556	0.929641	5e-05	0.00119245
ENSSSCT00000008281	ENSSSCG00000007549	CYP2W1	chr3:746181-751300	30.7051	18.5102	0.730157	0.0008	0.0111573	30.0622	18.5102	0.699628	0.00165	0.0192591
ENSSSCT00000027461	ENSSSCG00000023677	CHMP1A	chr6:467510-485467	35.9483	18.4736	0.960456	5e-05	0.00119245	40.2547	18.4736	1.12369	5e-05	0.00119245
ENSSSCT00000025744	ENSSSCG00000014291	AFF4	chr2:140670243-140804239	10.9647	18.4031	-0.747087	0.0331	0.168066	10.9959	18.4031	-0.742985	0.03305	0.167906
ENSSSCT00000026316	ENSSSCG00000022726	RHOD	chr2:4233084-4238597	33.7367	18.3816	0.876053	5e-05	0.00119245	41.3151	18.3816	1.16841	5e-05	0.00119245
ENSSSCT00000005525	ENSSSCG00000005009	KLHDC2	chr1:199945900-199957892	36.7632	18.3201	1.00484	5e-05	0.00119245	34.599	18.3201	0.917305	5e-05	0.00119245
ENSSSCT00000009391	ENSSSCG00000008581	NCOA1	chr3:121228061-121379022	10.466	18.3196	-0.807672	0.01275	0.0859406	11.566	18.3196	-0.663497	0.0426	0.198865
ENSSSCT00000017469	ENSSSCG00000016044	ORMDL1	chr15:105397158-105415129	32.2025	18.3098	0.814555	0.0001	0.00214362	35.5055	18.3098	0.955427	0.00015	0.00297337
ENSSSCT00000028434	ENSSSCG00000028804	CCDC181	chr4:89185741-89219499	9.45567	18.2904	-0.951833	5e-05	0.00119245	10.107	18.2904	-0.855736	0.0001	0.00214362
ENSSSCT00000016785	ENSSSCG00000015410	PHTF2	chr9:112759754-112803277	10.6162	18.2447	-0.78122	0.0004	0.00655605	8.95155	18.2447	-1.02727	5e-05	0.00119245
ENSSSCT00000010010	ENSSSCG00000009142	SEC24B	chr8:120752969-120827287	10.6328	18.2433	-0.77884	0.00015	0.00297337	10.5004	18.2433	-0.796921	0.00015	0.00297337
ENSSSCT00000006844	ENSSSCG00000006245	SDR16C5	chr4:82506091-82518561	32.9644	18.2242	0.855052	0.0001	0.00214362	25.8758	18.2242	0.505748	0.0295	0.155283
ENSSSCT00000024232	ENSSSCG00000030351	MEF2B	GL896560.1:2858-10249	8.69256	18.2097	-1.06686	5e-05	0.00119245	9.6912	18.2097	-0.909963	5e-05	0.00119245
ENSSSCT00000029858	ENSSSCG00000026169	MFSD12	chr2:75765072-75779436	32.5124	18.2024	0.836857	0.00015	0.00297337	36.5937	18.2024	1.00746	5e-05	0.00119245
ENSSSCT00000022559	ENSSSCG00000030291	RPRD2	chr4:107932169-108021740	10.3639	18.2019	-0.812521	0.0001	0.00214362	10.9001	18.2019	-0.739756	0.0003	0.00520502
ENSSSCT00000000089	ENSSSCG00000000083	RPS19BP1	chr5:6034981-6038546	41.4715	18.1781	1.18992	5e-05	0.00119245	47.477	18.1781	1.38503	5e-05	0.00119245
ENSSSCT00000030551	ENSSSCG00000021023	SCAF4	chr13:205632458-205690752	8.55608	18.1628	-1.08597	5e-05	0.00119245	8.46657	18.1628	-1.10114	5e-05	0.00119245
ENSSSCT00000004023	ENSSSCG00000003627	ZMYM4	chr6:85026746-85148157	11.4759	18.1088	-0.658084	0.00125	0.015631	10.5979	18.1088	-0.772909	0.0002	0.003754
ENSSSCT00000022296	ENSSSCG00000025644	CD1A	chr4:99905534-99909248	10.3189	18.1003	-0.810725	0.0003	0.00520502	14.294	18.1003	-0.340608	0.1173	0.381968
ENSSSCT00000007186	ENSSSCG00000006559	JTB	chr4:104615008-104617469	33.9996	18.0692	0.911981	5e-05	0.00119245	43.3151	18.0692	1.26134	5e-05	0.00119245
ENSSSCT00000002526	ENSSSCG00000002268	AKAP5	chr7:94903220-94904504	11.4103	18.0574	-0.662251	0.0037	0.0352729	9.16471	18.0574	-0.978426	5e-05	0.00119245
ENSSSCT00000026098	ENSSSCG00000004332	BACH2	chr1:64904129-65186708	8.1382	18.0568	-1.14976	0.0002	0.003754	8.02854	18.0568	-1.16933	0.0004	0.00655605
ENSSSCT00000002958	ENSSSCG00000002667	ZDHHC7	chr6:4215555-4232617	31.3886	17.9411	0.806973	0.0001	0.00214362	33.2573	17.9411	0.890406	5e-05	0.00119245
ENSSSCT00000012185	ENSSSCG00000011133	PFKFB3	chr10:70831451-70853803	10.0628	17.9402	-0.83416	5e-05	0.00119245	12.0749	17.9402	-0.571177	0.00745	0.058398
ENSSSCT00000026094	ENSSSCG00000028195	ERICH1	GL894666.1:89-31724	10.2648	17.94	-0.805469	0.0008	0.0111573	10.8547	17.94	-0.724853	0.00245	0.025797
ENSSSCT00000010394	ENSSSCG00000009479	RBM26	chr11:56098098-56173051	8.76856	17.8396	-1.02467	0.0074	0.05812	8.26731	17.8396	-1.10959	0.00445	0.0402804
ENSSSCT00000027923	ENSSSCG00000026025	HMGCL	chr6:75396360-75415548	28.777	17.8384	0.689934	0.0009	0.0122346	32.2953	17.8384	0.856341	5e-05	0.00119245
ENSSSCT00000003629	ENSSSCG00000003268	TSEN34	chr6:53280930-53288525	30.2022	17.8116	0.761836	0.00025	0.00449095	33.6761	17.8116	0.918908	5e-05	0.00119245
ENSSSCT00000017589	ENSSSCG00000016156	ACADL	chr15:124758367-124793429	33.3983	17.7872	0.908938	5e-05	0.00119245	23.8699	17.7872	0.424356	0.0371	0.181534
ENSSSCT00000026532	ENSSSCG00000024145	PRR11	chr12:37044931-37074164	8.24407	17.7848	-1.10922	5e-05	0.00119245	8.05641	17.7848	-1.14244	5e-05	0.00119245
ENSSSCT00000016926	ENSSSCG00000015537	XPR1	chr9:134231961-134329956	11.823	17.7692	-0.587787	0.00345	0.0335647	10.7399	17.7692	-0.726391	0.00075	0.0106787
ENSSSCT00000014035	ENSSSCG00000012840	CD151	chr2:144752-149372	37.8768	17.7575	1.09288	0.0039	0.0367092	40.5214	17.7575	1.19025	0.00175	0.0201145
ENSSSCT00000000938	ENSSSCG00000000859	PARPBP	chr5:85946495-86067179	11.349	17.7265	-0.643351	0.00215	0.0234086	11.2712	17.7265	-0.653269	0.00355	0.034246
ENSSSCT00000018040	ENSSSCG00000016570	TSPAN33	chr18:20563181-20583800	30.3647	17.7136	0.777536	0.0001	0.00214362	30.0272	17.7136	0.761408	0.0002	0.003754
ENSSSCT00000028863	ENSSSCG00000022758	PECR	chr15:131179806-131216819	30.7784	17.6829	0.799567	0.0004	0.00655605	33.9116	17.6829	0.939427	5e-05	0.00119245
ENSSSCT00000019021	ENSSSCG00000017472	IGFBP4	chr12:22275242-22290067	26.8615	17.6806	0.603371	0.0037	0.0352729	27.1203	17.6806	0.617201	0.00315	0.0312883
ENSSSCT00000011375	ENSSSCG00000010391	ERCC6	chr14:97908658-97979662	11.5792	17.6514	-0.608242	0.0033	0.0324458	11.3872	17.6514	-0.632371	0.0018	0.0205452
ENSSSCT00000036684	ENSSSCG00000010497	ENTPD1	chr14:116929632-117025486	9.75261	17.6298	-0.854158	0.0019	0.0214646	8.45727	17.6298	-1.05975	5e-05	0.00119245
ENSSSCT00000035703	ENSSSCG00000030901	BTNL6	chr7:28196734-28199491	52.8333	17.5863	1.587	5e-05	0.00119245	34.2332	17.5863	0.96095	0.0018	0.0205452
ENSSSCT00000023448	ENSSSCG00000022486	CBLB	chr13:162677244-162892743	11.3154	17.4823	-0.627605	0.00225	0.0242293	11.7395	17.4823	-0.57452	0.0056	0.0476499
ENSSSCT00000006479	ENSSSCG00000005900	GPT	chr4:388743-391693	27.1632	17.468	0.63694	0.0029	0.0293426	34.1217	17.468	0.965975	5e-05	0.00119245
ENSSSCT00000004605	ENSSSCG00000004166	AHI1	chr1:32049105-32243731	10.3012	17.4357	-0.759236	0.00025	0.00449095	7.94736	17.4357	-1.1335	5e-05	0.00119245
ENSSSCT00000029770	ENSSSCG00000025423	KCNK5	chr7:39704034-39743285	31.1373	17.4297	0.837098	5e-05	0.00119245	34.3375	17.4297	0.978238	5e-05	0.00119245
ENSSSCT00000031966	ENSSSCG00000022830	KANSL1L	chr15:124563201-124740175	7.49842	17.4119	-1.21542	0.0017	0.0196705	6.88223	17.4119	-1.33913	0.00185	0.0209924
ENSSSCT00000018774	ENSSSCG00000017245	CDC42EP4	chr12:7918388-7939265	34.0592	17.4007	0.968896	5e-05	0.00119245	44.7054	17.4007	1.3613	5e-05	0.00119245
ENSSSCT00000014679	ENSSSCG00000013435	MBD3	chr2:78157104-78165835	28.0872	17.3727	0.693087	0.001	0.013215	31.7173	17.3727	0.868447	5e-05	0.00119245
ENSSSCT00000026837	ENSSSCG00000021531	C9orf85	chr1:251759568-251826139	9.26185	17.3531	-0.905822	5e-05	0.00119245	8.77361	17.3531	-0.983952	5e-05	0.00119245
ENSSSCT00000012603	ENSSSCG00000011516	EIF4E3	chr13:58776449-58817255	8.25645	17.3428	-1.07074	5e-05	0.00119245	7.05004	17.3428	-1.29863	5e-05	0.00119245
ENSSSCT00000005425	ENSSSCG00000004917	MALT1	chr1:179658937-179701310	6.19082	17.3079	-1.48323	0.00225	0.0242293	5.56809	17.3079	-1.63618	0.0009	0.0122346
ENSSSCT00000024982	ENSSSCG00000026158	RAD18	GL893259.1:8491-56782	10.0999	17.2902	-0.775614	0.00095	0.0127118	10.0592	17.2902	-0.781438	0.0004	0.00655605
ENSSSCT00000032264	ENSSSCG00000030387	KIAA0040	chr9:128999764-129000061	40.6388	17.2605	1.23539	0.0026	0.0269681	48.9122	17.2605	1.50272	0.00025	0.00449095
ENSSSCT00000011166	ENSSSCG00000010200	CSGALNACT2	chr14:66203096-66246731	9.03349	17.25	-0.933243	5e-05	0.00119245	8.92521	17.25	-0.950639	5e-05	0.00119245
ENSSSCT00000000669	ENSSSCG00000000623	BCL2L14	chr5:63690798-63713753	27.6321	17.2171	0.6825	0.002	0.0222139	27.4168	17.2171	0.671217	0.0018	0.0205452
ENSSSCT00000017210	ENSSSCG00000015803	CYP4V2	chr15:53758511-53771282	9.70258	17.1697	-0.823421	0.0003	0.00520502	6.55118	17.1697	-1.39004	5e-05	0.00119245
ENSSSCT00000003320	ENSSSCG00000002989	AKT2	chr6:44331701-44378138	6.50241	17.1493	-1.3991	0.00645	0.0527433	8.61669	17.1493	-0.992941	0.02975	0.156149
ENSSSCT00000008791	ENSSSCG00000008022	TELO2	chr3:41835709-41844542	26.1848	17.1383	0.611499	0.0032	0.0317013	25.674	17.1383	0.58308	0.00455	0.0409193
ENSSSCT00000035374	ENSSSCG00000010301	PPP3CB	chr14:82376235-82430844	9.45583	17.1076	-0.855362	0.0491	0.218786	7.1105	17.1076	-1.26662	0.0057	0.0482378
ENSSSCT00000003653	ENSSSCG00000003289	ISOC2	chr6:54537559-54542884	29.5836	17.1065	0.790256	0.00445	0.0402804	32.4649	17.1065	0.924339	0.00065	0.00953497
ENSSSCT00000008785	ENSSSCG00000008017	NME3	chr3:41659586-41660822	53.4478	17.0254	1.65044	5e-05	0.00119245	64.8333	17.0254	1.92905	5e-05	0.00119245
ENSSSCT00000016753	ENSSSCG00000015378	SP4	chr9:99755242-99757438	8.49603	17.0126	-1.00174	5e-05	0.00119245	7.16581	17.0126	-1.2474	5e-05	0.00119245
ENSSSCT00000007967	ENSSSCG00000007282	PIGU	chr17:43158040-43276800	10.7514	16.973	-0.658709	0.004	0.0373974	9.92179	16.973	-0.774567	0.00025	0.00449095
ENSSSCT00000027703	ENSSSCG00000020927	SLC2A2	chr13:118535742-118557269	46.841	16.9092	1.46996	5e-05	0.00119245	62.4195	16.9092	1.88419	5e-05	0.00119245
ENSSSCT00000001060	ENSSSCG00000000970	PPP6R2	chr5:110441060-110497384	25.5777	16.836	0.603338	0.00475	0.0422547	27.6552	16.836	0.716003	0.00075	0.0106787
ENSSSCT00000003078	ENSSSCG00000002780	TPPP3	chr6:25312513-25316150	34.8213	16.8178	1.04998	5e-05	0.00119245	34.6054	16.8178	1.04101	5e-05	0.00119245
ENSSSCT00000032548	ENSSSCG00000024938	SH3BP5	chr13:2433540-2516422	29.4858	16.8082	0.810856	0.00685	0.0551543	31.4436	16.8082	0.903602	0.0029	0.0293426
ENSSSCT00000004759	ENSSSCG00000004304	SLC35A1	chr1:62558688-62588854	26.8157	16.7474	0.679138	0.00595	0.0497612	23.7867	16.7474	0.506214	0.03585	0.177097
ENSSSCT00000014338	ENSSSCG00000013118	MRPL16	chr2:11088777-11093513	25.922	16.7186	0.632725	0.0029	0.0293426	29.3829	16.7186	0.813522	0.0002	0.003754
ENSSSCT00000011768	ENSSSCG00000010756	MGMT	chr14:150607122-150887541	29.3145	16.6325	0.817613	0.0006	0.00895758	40.9778	16.6325	1.30084	5e-05	0.00119245
ENSSSCT00000025436	ENSSSCG00000022101	BRCA1	chr12:20029800-20091791	10.6981	16.6325	-0.636647	0.00135	0.0165389	9.82366	16.6325	-0.75967	0.0001	0.00214362
ENSSSCT00000016405	ENSSSCG00000015039	BCO2	chr9:44724878-44767958	28.9796	16.6295	0.801289	0.0003	0.00520502	27.0815	16.6295	0.70356	0.001	0.013215
ENSSSCT00000008483	ENSSSCG00000007738	ASL	chr3:16890466-16899578	36.1309	16.6039	1.12171	5e-05	0.00119245	39.8695	16.6039	1.26376	5e-05	0.00119245
ENSSSCT00000015040	ENSSSCG00000013766	IL27RA	chr2:65401419-65427116	29.7499	16.5618	0.845023	0.00075	0.0106787	34.9237	16.5618	1.07634	0.0001	0.00214362
ENSSSCT00000003711	ENSSSCG00000003342	DVL1	chr6:58116728-58126973	32.8386	16.5376	0.989648	5e-05	0.00119245	35.0844	16.5376	1.08508	5e-05	0.00119245
ENSSSCT00000013457	ENSSSCG00000012307	CCNB3	chrX:48854468-48916020	9.38095	16.5359	-0.817796	0.0001	0.00214362	9.78517	16.5359	-0.756933	0.00015	0.00297337
ENSSSCT00000018565	ENSSSCG00000017052	ADAM19	chr16:71570440-71669557	10.2047	16.4823	-0.691692	0.0005	0.00778241	10.949	16.4823	-0.590117	0.00355	0.034246
ENSSSCT00000017605	ENSSSCG00000016170	BARD1	chr15:129595246-129677996	9.08883	16.4541	-0.856283	5e-05	0.00119245	9.09533	16.4541	-0.855251	0.00015	0.00297337
ENSSSCT00000034695	ENSSSCG00000013297	CD44	chr2:28156391-28374853	5.95568	16.4153	-1.4627	0.0471	0.212703	5.95602	16.4153	-1.46262	0.05185	0.226698
ENSSSCT00000010603	ENSSSCG00000009670	ESCO2	chr14:12674864-12711239	10.7425	16.4006	-0.610422	0.00305	0.0305033	11.0312	16.4006	-0.572163	0.0056	0.0476499
ENSSSCT00000016328	ENSSSCG00000014967	FAM76B	chr9:31708430-31728112	9.50548	16.4003	-0.786893	0.0004	0.00655605	9.17334	16.4003	-0.838205	0.0002	0.003754
ENSSSCT00000001644	ENSSSCG00000001475	LOC100155600	chr7:29756224-29760618	39.3864	16.3931	1.26461	5e-05	0.00119245	41.2341	16.3931	1.33075	5e-05	0.00119245
ENSSSCT00000014853	ENSSSCG00000013599	ANGPTL4	chr2:71271943-71279720	27.9285	16.3736	0.770362	0.0002	0.003754	28.7409	16.3736	0.811728	0.0001	0.00214362
ENSSSCT00000018656	ENSSSCG00000017137	METRNL	chr12:554561-562054	48.9736	16.3093	1.5863	5e-05	0.00119245	62.3068	16.3093	1.93369	5e-05	0.00119245
ENSSSCT00000027168	ENSSSCG00000025473	PIGM	chr4:98433352-98434624	10.7011	16.2056	-0.598731	0.00905	0.0673273	9.30481	16.2056	-0.800446	0.0004	0.00655605
ENSSSCT00000009171	ENSSSCG00000008376	COMMD1	chr3:83690952-83749571	40.9171	16.2012	1.33661	5e-05	0.00119245	41.7832	16.2012	1.36682	5e-05	0.00119245
ENSSSCT00000000985	ENSSSCG00000000901	FGD6	chr5:92308675-92474137	9.01224	16.1882	-0.844988	0.0001	0.00214362	8.61976	16.1882	-0.909227	5e-05	0.00119245
ENSSSCT00000014824	ENSSSCG00000013572	PNPLA6	chr2:72031151-72055011	28.307	16.1167	0.812602	5e-05	0.00119245	28.935	16.1167	0.844258	5e-05	0.00119245
ENSSSCT00000025503	ENSSSCG00000024157	ZNF800	chr18:21946523-21962952	6.15173	16.0527	-1.38376	5e-05	0.00119245	5.37629	16.0527	-1.57814	5e-05	0.00119245
ENSSSCT00000017193	ENSSSCG00000015790	SLC25A4	chr15:52922447-52926945	32.4035	16.0493	1.01364	5e-05	0.00119245	36.5128	16.0493	1.18589	5e-05	0.00119245
ENSSSCT00000011734	ENSSSCG00000010723	ACADSB	chr14:144174273-144190924	27.5896	15.9893	0.787014	5e-05	0.00119245	27.4479	15.9893	0.779582	0.00015	0.00297337
ENSSSCT00000004678	ENSSSCG00000004233	SMPDL3A	chr1:44076442-44094651	34.0853	15.9333	1.0971	5e-05	0.00119245	11.3795	15.9333	-0.485615	0.06845	0.271521
ENSSSCT00000009896	ENSSSCG00000009036	LSM6	chr8:87711842-87727444	25.6686	15.8958	0.691359	0.0046	0.0412761	32.2508	15.8958	1.02069	0.0001	0.00214362
ENSSSCT00000007255	ENSSSCG00000006621	CGN	chr4:106854926-106878997	23.9711	15.842	0.597543	0.0038	0.035985	26.0137	15.842	0.715518	0.0002	0.003754
ENSSSCT00000011503	ENSSSCG00000010513	LCOR	chr14:118065018-118068750	9.51042	15.7946	-0.731849	0.0004	0.00655605	9.65994	15.7946	-0.709344	0.00055	0.00838524
ENSSSCT00000026707	ENSSSCG00000022492	AMPD3	chr2:52379711-52419852	7.585	15.7694	-1.0559	5e-05	0.00119245	7.77725	15.7694	-1.01979	5e-05	0.00119245
ENSSSCT00000028973	ENSSSCG00000024391	EMC10	chr6:51159341-51173214	25.597	15.7505	0.700579	0.0007	0.010104	25.4586	15.7505	0.69276	0.0007	0.010104
ENSSSCT00000012826	ENSSSCG00000011716	P2RY13	chr13:99784678-99785779	6.33701	15.6598	-1.3052	5e-05	0.00119245	4.05858	15.6598	-1.94802	5e-05	0.00119245
ENSSSCT00000010491	ENSSSCG00000009570	MPHOSPH8	chr11:86858325-86894015	10.186	15.6423	-0.618869	0.002	0.0222139	9.79736	15.6423	-0.67499	0.0008	0.0111573
ENSSSCT00000023238	ENSSSCG00000023868	C3AR1	GL896371.1:25479-26910	8.14528	15.6423	-0.941417	5e-05	0.00119245	8.92812	15.6423	-0.809025	0.0001	0.00214362
ENSSSCT00000023008	ENSSSCG00000024230	MYL9	chr17:45264860-45272225	34.7438	15.639	1.15161	5e-05	0.00119245	22.0154	15.639	0.493366	0.04235	0.198175
ENSSSCT00000011263	ENSSSCG00000010291	PLA2G12B	chr14:81819439-81844247	38.4236	15.6303	1.29764	5e-05	0.00119245	39.8241	15.6303	1.34929	5e-05	0.00119245
ENSSSCT00000014676	ENSSSCG00000013432	MIDN	chr2:77790467-77797467	10.2143	15.6234	-0.613118	0.0029	0.0293426	10.2911	15.6234	-0.602315	0.0038	0.035985
ENSSSCT00000029630	ENSSSCG00000029708	SLC25A38	chr13:26291236-26304508	24.6387	15.5783	0.661385	0.00155	0.0183734	20.9129	15.5783	0.424855	0.0423	0.198072
ENSSSCT00000004780	ENSSSCG00000004324	LYRM2	chr1:64552373-64554727	42.0638	15.5189	1.43855	0.0014	0.0169856	49.5984	15.5189	1.67627	0.00045	0.00719494
ENSSSCT00000029797	ENSSSCG00000015503	MRPS14	chr9:128703420-128715554	29.898	15.3861	0.958428	0.0175	0.108274	45.8018	15.3861	1.57378	5e-05	0.00119245
ENSSSCT00000006418	ENSSSCG00000005839	FBXW5	chr1:313760867-313763290	24.5017	15.3244	0.677053	0.0014	0.0169856	25.722	15.3244	0.747175	0.0002	0.003754
ENSSSCT00000007113	ENSSSCG00000006494	SLC25A44	chr4:102579408-102593041	9.68489	15.1578	-0.646257	0.0015	0.0178968	9.67702	15.1578	-0.64743	0.0016	0.018837
ENSSSCT00000028938	ENSSSCG00000027628	IL6R	chr4:104198430-104250107	9.64277	15.1448	-0.651303	0.00195	0.0218749	9.21372	15.1448	-0.716967	0.00075	0.0106787
ENSSSCT00000011543	ENSSSCG00000010551	BLOC1S2	chr14:120893568-120900535	24.4065	15.1409	0.688816	0.0015	0.0178968	23.8289	15.1409	0.654263	0.002	0.0222139
ENSSSCT00000002773	ENSSSCG00000002495	SYNE3	chr7:123887450-123943922	24.0692	15.1007	0.672578	0.0013	0.0160896	29.0717	15.1007	0.945002	5e-05	0.00119245
ENSSSCT00000010401	ENSSSCG00000009486	SLITRK6	chr11:62018182-62020711	9.84088	15.081	-0.615873	0.00355	0.034246	8.69621	15.081	-0.794274	5e-05	0.00119245
ENSSSCT00000032874	ENSSSCG00000012676	MBNL3	chrX:124498339-124539558	8.61541	15.0781	-0.807468	0.00015	0.00297337	7.08492	15.0781	-1.08964	5e-05	0.00119245
ENSSSCT00000033589	ENSSSCG00000011946	ALCAM	chr13:163247243-163247801	34.9903	15.0589	1.21634	5e-05	0.00119245	30.6342	15.0589	1.02452	0.0002	0.003754
ENSSSCT00000022593	ENSSSCG00000029763	IFI35	chr12:19999638-20002311	30.6015	15.0144	1.02725	5e-05	0.00119245	34.2952	15.0144	1.19166	5e-05	0.00119245
ENSSSCT00000030705	ENSSSCG00000028755	TSSC1	chr3:140570744-140645632	24.7574	14.9675	0.726029	0.0006	0.00895758	26.7593	14.9675	0.838207	0.0001	0.00214362
ENSSSCT00000016263	ENSSSCG00000014907	CREBZF	chr9:21863870-21864935	33.1788	14.9538	1.14975	5e-05	0.00119245	30.0264	14.9538	1.00572	5e-05	0.00119245
ENSSSCT00000019263	ENSSSCG00000025775	TADA2A	chr12:40507754-40616164	8.8266	14.9384	-0.759097	0.00415	0.0383737	8.29977	14.9384	-0.847883	0.0024	0.0254043
ENSSSCT00000032230	ENSSSCG00000030361	PRKCZ	chr6:58385684-58462055	26.7414	14.8579	0.847842	5e-05	0.00119245	26.6003	14.8579	0.840209	5e-05	0.00119245
ENSSSCT00000006902	ENSSSCG00000006297	DPT	chr4:89969323-90001121	32.6094	14.8268	1.13708	5e-05	0.00119245	35.8667	14.8268	1.27444	5e-05	0.00119245
ENSSSCT00000001679	ENSSSCG00000001506	RGL2	chr7:34159506-34166143	32.526	14.8164	1.1344	5e-05	0.00119245	33.1674	14.8164	1.16258	5e-05	0.00119245
ENSSSCT00000019078	ENSSSCG00000017524	CDK5RAP3	chr12:24044540-24054025	31.2673	14.8075	1.07833	5e-05	0.00119245	30.6634	14.8075	1.05019	5e-05	0.00119245
ENSSSCT00000017556	ENSSSCG00000016125	INO80D	chr15:120861245-120921092	7.53559	14.7664	-0.970524	5e-05	0.00119245	7.73979	14.7664	-0.931949	5e-05	0.00119245
ENSSSCT00000005328	ENSSSCG00000004826	VIMP	chr1:156057762-156066216	26.9899	14.7617	0.870567	0.0001	0.00214362	41.1019	14.7617	1.47735	5e-05	0.00119245
ENSSSCT00000006162	ENSSSCG00000005604	PBX3	chr1:300208110-300433703	8.66282	14.7596	-0.768745	0.0001	0.00214362	8.39931	14.7596	-0.813312	0.00015	0.00297337
ENSSSCT00000015282	ENSSSCG00000013991	C1orf35	chr2:53870873-53873178	26.7476	14.7072	0.862885	0.00035	0.0058827	25.2057	14.7072	0.777227	0.00105	0.0137227
ENSSSCT00000006173	ENSSSCG00000005614	FAM129B	chr1:301920984-301940945	24.3279	14.6329	0.733399	0.0003	0.00520502	43.5762	14.6329	1.57433	5e-05	0.00119245
ENSSSCT00000027606	ENSSSCG00000026229	PCBD2	GL895237.2:11216-13749	29.4796	14.6239	1.01139	0.00025	0.00449095	38.7316	14.6239	1.40518	5e-05	0.00119245
ENSSSCT00000012757	ENSSSCG00000011653	PCCB	chr13:84587406-84691136	23.565	14.6095	0.689739	0.0003	0.00520502	24.7692	14.6095	0.761635	0.0002	0.003754
ENSSSCT00000017180	ENSSSCG00000015779	CDKN2AIP	chr15:51499659-51503186	22.9503	14.5952	0.653015	0.00255	0.0266091	24.6054	14.5952	0.753479	0.0008	0.0111573
ENSSSCT00000019480	ENSSSCG00000017900	KIF1C	chr12:53966167-53993410	22.4393	14.5645	0.623567	0.00205	0.02262	22.3897	14.5645	0.620377	0.0021	0.0230209
ENSSSCT00000031717	ENSSSCG00000029849	S1PR1	GL893226.1:113841-114990	8.41307	14.564	-0.7917	0.0012	0.0151808	9.60821	14.564	-0.600064	0.01185	0.0815406
ENSSSCT00000007846	ENSSSCG00000007173	IDH3B	chr17:37441072-37451309	24.3405	14.5624	0.741105	0.006	0.0501269	28.4685	14.5624	0.967116	0.0002	0.003754
ENSSSCT00000012118	ENSSSCG00000011074	ARHGAP21	chr10:56044598-56132190	6.17318	14.5518	-1.23712	5e-05	0.00119245	5.60912	14.5518	-1.37535	5e-05	0.00119245
ENSSSCT00000023793	ENSSSCG00000023852	CCL17	chr6:17342469-17345459	4.78258	14.5336	-1.60353	0.00015	0.00297337	1.6167	14.5336	-3.16827	5e-05	0.00119245
ENSSSCT00000001565	ENSSSCG00000001423	NELFE	chr7:27765301-27771676	26.9129	14.513	0.890952	5e-05	0.00119245	28.8436	14.513	0.990904	5e-05	0.00119245
ENSSSCT00000005202	ENSSSCG00000004710	ADAL	chr1:142954882-142984486	8.43656	14.485	-0.779833	0.00865	0.0651238	7.96195	14.485	-0.863365	0.0046	0.0412761
ENSSSCT00000009189	ENSSSCG00000008392	BCL11A	chr3:85284283-85374450	8.08576	14.4551	-0.838122	0.00015	0.00297337	7.28963	14.4551	-0.987661	5e-05	0.00119245
ENSSSCT00000002909	ENSSSCG00000002622	TMEM14A	chr7:134211430-134219001	22.3934	14.446	0.632404	0.0062	0.0512756	22.7248	14.446	0.653596	0.0054	0.0464359
ENSSSCT00000019302	ENSSSCG00000017735	RHOT1	chr12:44462632-44500419	8.10732	14.4372	-0.832497	0.0001	0.00214362	7.85952	14.4372	-0.877282	5e-05	0.00119245
ENSSSCT00000006417	ENSSSCG00000005838	TRAF2	chr1:313771802-313782852	32.5992	14.3483	1.18395	5e-05	0.00119245	41.5492	14.3483	1.53394	5e-05	0.00119245
ENSSSCT00000014611	ENSSSCG00000013377	USH1C	chr2:44626204-44704645	24.6445	14.3448	0.78074	0.0001	0.00214362	27.778	14.3448	0.953417	5e-05	0.00119245
ENSSSCT00000003552	ENSSSCG00000003197	MED25	chr6:50563384-50578613	9.42702	14.3123	-0.602379	0.0049	0.0433301	8.92045	14.3123	-0.682064	0.0013	0.0160896
ENSSSCT00000014344	ENSSSCG00000013124	PATL1	chr2:11288410-11331895	8.60523	14.3017	-0.732896	0.0006	0.00895758	8.60496	14.3017	-0.732941	0.00065	0.00953497
ENSSSCT00000006255	ENSSSCG00000005688	PTGES	chr1:303779650-303792393	30.3685	14.2878	1.08779	5e-05	0.00119245	28.9389	14.2878	1.01823	5e-05	0.00119245
ENSSSCT00000028084	ENSSSCG00000021113	CACFD1	chr1:307030424-307039181	39.2183	14.2782	1.45771	5e-05	0.00119245	48.347	14.2782	1.75961	5e-05	0.00119245
ENSSSCT00000030703	ENSSSCG00000023118	BZW2	chr9:94800586-94817628	32.3828	14.2588	1.18337	5e-05	0.00119245	39.3579	14.2588	1.4648	5e-05	0.00119245
ENSSSCT00000025921	ENSSSCG00000028516	LARP4	chr5:16853059-16884129	24.4429	14.186	0.784945	0.0078	0.0603359	23.0833	14.186	0.702376	0.01495	0.0964515
ENSSSCT00000009915	ENSSSCG00000009052	ZNF330	chr8:91327257-91340812	21.7673	14.18	0.618306	0.00265	0.0273669	21.4819	14.18	0.599262	0.0042	0.038713
ENSSSCT00000009134	ENSSSCG00000008340	ANTXR1	chr3:76587950-76839636	8.65486	14.173	-0.711565	0.00135	0.0165389	8.24802	14.173	-0.781028	5e-05	0.00119245
ENSSSCT00000009010	ENSSSCG00000008228	GNLY	chr3:61952961-61957608	24.6588	14.1579	0.800491	0.0055	0.0470618	29.927	14.1579	1.07984	0.00015	0.00297337
ENSSSCT00000005273	ENSSSCG00000004774	IVD	chr1:145978731-145995732	22.6945	14.1487	0.681668	0.00095	0.0127118	22.5177	14.1487	0.670389	0.00135	0.0165389
ENSSSCT00000009495	ENSSSCG00000008678	TMEM129	chr8:296932-312645	23.7393	14.1392	0.747583	0.0289	0.153234	28.9125	14.1392	1.032	0.0024	0.0254043
ENSSSCT00000033172	ENSSSCG00000003825	CYP2J2	chr6:139936091-139965989	76.2166	14.0937	2.43505	5e-05	0.00119245	56.3541	14.0937	1.99947	0.00065	0.00953497
ENSSSCT00000029625	ENSSSCG00000027046	USP9Y	chrY:502881-660050	8.07188	14.0396	-0.798521	0.00955	0.0700293	12.9258	14.0396	-0.119243	0.65445	0.899985
ENSSSCT00000010974	ENSSSCG00000010017	SMTN	chr14:50990975-51014415	26.0652	14.034	0.893201	0.00025	0.00449095	20.0544	14.034	0.51499	0.01715	0.106666
ENSSSCT00000027647	ENSSSCG00000025822	SFRP1	chr17:11790233-11878618	6.42962	13.988	-1.12139	5e-05	0.00119245	6.25063	13.988	-1.16212	5e-05	0.00119245
ENSSSCT00000015984	ENSSSCG00000014633	PRKCDBP	chr9:3991502-3993590	25.0687	13.9505	0.845568	0.0002	0.003754	24.7247	13.9505	0.825631	0.0002	0.003754
ENSSSCT00000005291	ENSSSCG00000004792	FAM98B	chr1:148274919-148303739	6.27952	13.9365	-1.15014	0.0059	0.0494723	5.11595	13.9365	-1.4458	0.001	0.013215
ENSSSCT00000036616	ENSSSCG00000013237	SPI1	chr2:16421196-16452507	7.27916	13.9332	-0.936687	0.0369	0.180818	6.44693	13.9332	-1.11185	0.01785	0.109729
ENSSSCT00000033522	ENSSSCG00000011795	IGF2BP2	chr13:133022539-133065865	6.17891	13.9328	-1.17306	0.0029	0.0293426	6.30875	13.9328	-1.14306	0.00945	0.0694792
ENSSSCT00000027891	ENSSSCG00000025097	TMEM61	chr6:145505143-145514876	24.5325	13.9306	0.816431	0.0007	0.010104	33.3806	13.9306	1.26075	5e-05	0.00119245
ENSSSCT00000027398	ENSSSCG00000024495	SELPLG	chr14:44718075-44719326	8.12711	13.9248	-0.776846	0.00145	0.017463	8.07068	13.9248	-0.786899	0.0014	0.0169856
ENSSSCT00000011460	ENSSSCG00000010472	HHEX	chr14:113794195-113800161	7.00264	13.9232	-0.991517	5e-05	0.00119245	6.08985	13.9232	-1.19301	5e-05	0.00119245
ENSSSCT00000007415	ENSSSCG00000006769	SLC16A1	chr4:117603633-117614944	24.1129	13.9158	0.793079	0.00025	0.00449095	27.2512	13.9158	0.969594	5e-05	0.00119245
ENSSSCT00000003282	ENSSSCG00000002959	FAM98C	chr6:42815863-42819771	24.749	13.9156	0.830666	0.00015	0.00297337	23.5744	13.9156	0.760518	0.00075	0.0106787
ENSSSCT00000010434	ENSSSCG00000009516	UBAC2	chr11:75379203-75555916	23.3174	13.9112	0.745161	0.04445	0.204635	23.8495	13.9112	0.777718	0.0347	0.173262
ENSSSCT00000003728	ENSSSCG00000003359	TPRG1L	chr6:59872017-59888257	21.0071	13.9052	0.595255	0.03405	0.171313	20.1948	13.9052	0.538365	0.0536	0.231893
ENSSSCT00000028312	ENSSSCG00000002032	SLC7A8	chr7:81241894-81260081	8.67695	13.8613	-0.675804	0.00765	0.0594848	5.19421	13.8613	-1.41609	5e-05	0.00119245
ENSSSCT00000028771	ENSSSCG00000022292	NPL	GL892421.2:8600-40465	21.1004	13.844	0.608011	0.00445	0.0402804	17.9762	13.844	0.376831	0.05925	0.246889
ENSSSCT00000017988	ENSSSCG00000016520	CREB3L2	chr18:12205294-12332432	9.041	13.8392	-0.614205	0.00525	0.045513	10.9142	13.8392	-0.342559	0.11535	0.377907
ENSSSCT00000035987	ENSSSCG00000030778	MFI2	chr13:142726243-142751987	40.6559	13.8074	1.55802	0.01225	0.0834139	29.5891	13.8074	1.09962	0.0517	0.226367
ENSSSCT00000001071	ENSSSCG00000000981	CRELD2	chr5:110965838-110973596	22.0865	13.7939	0.679137	0.00265	0.0273669	27.417	13.7939	0.991044	5e-05	0.00119245
ENSSSCT00000015567	ENSSSCG00000014247	ALDH7A1	chr2:134952714-134986910	24.7874	13.7847	0.84654	5e-05	0.00119245	25.0278	13.7847	0.860465	5e-05	0.00119245
ENSSSCT00000007682	ENSSSCG00000007019	GPAT4	chr17:12137572-12157036	26.5823	13.7825	0.947622	0.0003	0.00520502	30.6893	13.7825	1.1549	5e-05	0.00119245
ENSSSCT00000018742	ENSSSCG00000017217	KCTD2	chr12:6241591-6251993	20.9221	13.7575	0.604805	0.02425	0.135696	19.821	13.7575	0.526808	0.04735	0.21344
ENSSSCT00000030347	ENSSSCG00000027165	UBE2G2	chr13:217375638-217390019	20.9604	13.7541	0.607807	0.0033	0.0324458	22.7398	13.7541	0.725361	0.0003	0.00520502
ENSSSCT00000018780	ENSSSCG00000017251	SOX9	chr12:9027638-9033210	7.69125	13.748	-0.83793	5e-05	0.00119245	7.20207	13.748	-0.932738	5e-05	0.00119245
ENSSSCT00000009424	ENSSSCG00000008613	GEN1	chr3:128215323-128245096	9.02008	13.7317	-0.606295	0.00415	0.0383737	9.18957	13.7317	-0.579438	0.0062	0.0512756
ENSSSCT00000005154	ENSSSCG00000004668	SLC30A4	chr1:140770603-140793361	23.557	13.7266	0.779181	0.0005	0.00778241	29.7006	13.7266	1.11352	5e-05	0.00119245
ENSSSCT00000026864	ENSSSCG00000024693	MRPL17	chr9:3733326-3737898	20.6823	13.6671	0.597687	0.00315	0.0312883	21.9675	13.6671	0.684665	0.00065	0.00953497
ENSSSCT00000035155	ENSSSCG00000017416	DHX58	chr12:20937867-20946850	25.9653	13.6312	0.929671	0.005	0.043935	31.7223	13.6312	1.21858	0.0007	0.010104
ENSSSCT00000016260	ENSSSCG00000014905	TMEM126B	chr9:21817759-21825349	20.4689	13.6311	0.586535	0.01125	0.0785609	19.7121	13.6311	0.532186	0.02295	0.130533
ENSSSCT00000002921	ENSSSCG00000002632	SLC28A1	GL894030.1:5912-35776	23.5665	13.6113	0.791939	0.0003	0.00520502	24.7038	13.6113	0.859933	0.0001	0.00214362
ENSSSCT00000026173	ENSSSCG00000026813	SURF4	GL896220.1:1575-4716	29.5456	13.6039	1.11893	0.0001	0.00214362	39.5075	13.6039	1.53811	5e-05	0.00119245
ENSSSCT00000010220	ENSSSCG00000009326	KATNAL1	chr11:6760616-6803995	6.53852	13.5947	-1.056	5e-05	0.00119245	6.02873	13.5947	-1.17311	5e-05	0.00119245
ENSSSCT00000002090	ENSSSCG00000001865	SCAPER	chr7:61582142-61745989	8.78655	13.5938	-0.629584	0.0029	0.0293426	7.21281	13.5938	-0.91432	5e-05	0.00119245
ENSSSCT00000013096	ENSSSCG00000011968	NIT2	chr13:168425735-168445117	23.8186	13.5712	0.811545	0.0004	0.00655605	24.8	13.5712	0.869794	0.0001	0.00214362
ENSSSCT00000004178	ENSSSCG00000003775	RABGGTB	chr6:127497459-127506518	30.7532	13.5668	1.18065	5e-05	0.00119245	29.2095	13.5668	1.10636	5e-05	0.00119245
ENSSSCT00000018962	ENSSSCG00000017418	NKIRAS2	chr12:20996625-21013028	21.1369	13.5526	0.641198	0.00245	0.025797	21.9285	13.5526	0.694237	0.0009	0.0122346
ENSSSCT00000028444	ENSSSCG00000024300	TMEM254	chr14:88542474-88551614	8.80352	13.5362	-0.620675	0.0041	0.0380764	9.30601	13.5362	-0.540593	0.01155	0.0800964
ENSSSCT00000008733	ENSSSCG00000007970	POLR3K	chr3:40861811-40865179	21.3249	13.5169	0.657772	0.00235	0.0250032	20.476	13.5169	0.599166	0.00605	0.0504261
ENSSSCT00000007969	ENSSSCG00000007284	NCOA6	chr17:43309803-43393835	8.32592	13.507	-0.698025	0.0021	0.0230209	8.12649	13.507	-0.733003	0.00115	0.01472
ENSSSCT00000016682	ENSSSCG00000015309	MTERF1	chr9:78583164-78589263	8.66918	13.4828	-0.637151	0.0076	0.0592256	8.59063	13.4828	-0.650282	0.00605	0.0504261
ENSSSCT00000030556	ENSSSCG00000027877	TLR10	chr8:31604731-31615025	8.25115	13.4827	-0.708446	0.0008	0.0111573	7.56213	13.4827	-0.834249	0.0001	0.00214362
ENSSSCT00000032554	ENSSSCG00000022775	INO80E	GL892813.1:6076-15041	6.77802	13.4652	-0.990302	0.0235	0.132624	4.89492	13.4652	-1.45988	0.0038	0.035985
ENSSSCT00000013017	ENSSSCG00000011895	PLA1A	chr13:149969015-149996425	24.2309	13.4078	0.853782	0.0002	0.003754	23.3541	13.4078	0.800609	0.0004	0.00655605
ENSSSCT00000005744	ENSSSCG00000005211	CD274	chr1:242396224-242416185	6.45448	13.401	-1.05397	0.00025	0.00449095	4.50408	13.401	-1.57304	5e-05	0.00119245
ENSSSCT00000017270	ENSSSCG00000015859	SAP130	chr15:66025272-66122052	6.82423	13.3836	-0.971725	5e-05	0.00119245	6.0046	13.3836	-1.15632	5e-05	0.00119245
ENSSSCT00000006431	ENSSSCG00000005852	ENTPD8	chr1:314009380-314012067	29.9829	13.3557	1.16668	5e-05	0.00119245	38.6742	13.3557	1.53391	5e-05	0.00119245
ENSSSCT00000006406	ENSSSCG00000005828	EGFL7	chr1:313727476-313740538	43.5902	13.2885	1.71383	5e-05	0.00119245	53.322	13.2885	2.00456	5e-05	0.00119245
ENSSSCT00000016640	ENSSSCG00000015271	PRELP	chr9:70484581-70498199	6.80392	13.2671	-0.963412	5e-05	0.00119245	8.16003	13.2671	-0.701202	0.0036	0.0345772
ENSSSCT00000007118	ENSSSCG00000006499	LAMTOR2	chr4:102714739-102719077	27.3421	13.2628	1.04374	5e-05	0.00119245	31.3814	13.2628	1.24253	5e-05	0.00119245
ENSSSCT00000014455	ENSSSCG00000013235	MADD	chr2:16516737-16535294	8.82161	13.2519	-0.587089	0.00415	0.0383737	8.88012	13.2519	-0.577552	0.0046	0.0412761
ENSSSCT00000026356	ENSSSCG00000023315	THOC6	chr3:40533918-40538505	20.8236	13.2488	0.652356	0.00985	0.0716055	23.3658	13.2488	0.818536	0.0008	0.0111573
ENSSSCT00000016688	ENSSSCG00000015315	RBM48	chr9:79173390-79197702	8.26137	13.2384	-0.680273	0.0009	0.0122346	7.66719	13.2384	-0.787957	0.0002	0.003754
ENSSSCT00000003877	ENSSSCG00000003490	MRTO4	chr6:71809895-71816020	22.5914	13.2099	0.77416	0.0004	0.00655605	28.3597	13.2099	1.10223	5e-05	0.00119245
ENSSSCT00000018094	ENSSSCG00000016620	TSPAN12	chr18:27651286-27717509	22.9273	13.1624	0.800648	0.0001	0.00214362	20.9142	13.1624	0.668066	0.0011	0.0142222
ENSSSCT00000011849	ENSSSCG00000010831	DUSP10	chr10:12977460-13015992	7.38813	13.1549	-0.83232	0.0001	0.00214362	6.74121	13.1549	-0.964521	5e-05	0.00119245
ENSSSCT00000030490	ENSSSCG00000021828	TAPT1	chr8:11018820-11067248	8.44824	13.1384	-0.637071	0.0029	0.0293426	8.93976	13.1384	-0.555485	0.0094	0.069199
ENSSSCT00000006578	ENSSSCG00000005995	MTBP	chr4:19561260-19634315	8.59532	13.1341	-0.611697	0.0024	0.0254043	8.76865	13.1341	-0.582893	0.0058	0.0488708
ENSSSCT00000012109	ENSSSCG00000011065	MASTL	chr10:54162370-54183112	5.41798	13.1236	-1.27634	5e-05	0.00119245	5.01225	13.1236	-1.38863	5e-05	0.00119245
ENSSSCT00000010441	ENSSSCG00000009523	GGACT	chr11:76549454-76549907	39.7207	13.1209	1.59803	5e-05	0.00119245	35.8249	13.1209	1.4491	5e-05	0.00119245
ENSSSCT00000010981	ENSSSCG00000010024	RNF185	chr14:51057233-51088417	31.9999	13.0872	1.28992	5e-05	0.00119245	38.5265	13.0872	1.5577	5e-05	0.00119245
ENSSSCT00000001579	ENSSSCG00000001433	PPT2	chr7:28009238-28021532	19.9554	13.0851	0.608855	0.0132	0.0882579	22.9869	13.0851	0.812888	0.00085	0.0116991
ENSSSCT00000035287	ENSSSCG00000005997	COL14A1	chr4:19715673-19949617	28.5582	13.0817	1.12635	0.0049	0.0433301	27.2005	13.0817	1.05608	0.00705	0.0562059
ENSSSCT00000017135	ENSSSCG00000015735	PTPN18	chr15:35772236-35792027	22.4653	13.0514	0.783496	0.0002	0.003754	25.0228	13.0514	0.93904	5e-05	0.00119245
ENSSSCT00000007447	ENSSSCG00000006799	LRIF1	chr4:119652637-119659834	8.05311	13.0226	-0.6934	0.0008	0.0111573	8.0378	13.0226	-0.696146	0.00075	0.0106787
ENSSSCT00000007815	ENSSSCG00000007143	MAVS	chr17:36195471-36210175	24.068	13.0141	0.887037	0.0007	0.010104	25.1177	13.0141	0.948623	0.00055	0.00838524
ENSSSCT00000001655	ENSSSCG00000001483	FAM83B	chr7:30525283-30609643	7.8606	12.9775	-0.723301	0.0006	0.00895758	8.4938	12.9775	-0.611531	0.0026	0.0269681
ENSSSCT00000031268	ENSSSCG00000025134	FAM171B	chr15:101733010-101806977	8.17749	12.9659	-0.664996	0.00085	0.0116991	6.84023	12.9659	-0.92261	5e-05	0.00119245
ENSSSCT00000011293	ENSSSCG00000010316	KAT6B	chr14:83530606-83722778	7.54355	12.9025	-0.774336	0.00015	0.00297337	7.31085	12.9025	-0.819539	0.00015	0.00297337
ENSSSCT00000001961	ENSSSCG00000001755	HYKK	chr7:52943000-52965740	19.8253	12.9002	0.619952	0.0045	0.0405666	19.3101	12.9002	0.581965	0.00795	0.0612519
ENSSSCT00000015975	ENSSSCG00000014624	ARFIP2	chr9:3908517-3913433	22.9958	12.8995	0.834061	0.0001	0.00214362	28.4023	12.8995	1.1387	5e-05	0.00119245
ENSSSCT00000009895	ENSSSCG00000009035	SLC10A7	chr8:87282707-87651904	7.09732	12.8914	-0.86106	0.0006	0.00895758	8.11328	12.8914	-0.668048	0.00565	0.0479669
ENSSSCT00000006221	ENSSSCG00000005658	ZDHHC12	chr1:303093221-303107386	20.3345	12.8779	0.659037	0.0234	0.13227	20.6533	12.8779	0.681474	0.0188	0.113701
ENSSSCT00000009698	ENSSSCG00000008858	KLHL2	chr8:45678239-45785868	20.7233	12.8169	0.693205	0.00085	0.0116991	20.0854	12.8169	0.648096	0.0023	0.0246104
ENSSSCT00000015588	ENSSSCG00000014266	CDC42SE2	chr2:138992123-138999352	29.748	12.7885	1.21795	0.01705	0.106261	26.8855	12.7885	1.07198	0.03435	0.172307
ENSSSCT00000025952	ENSSSCG00000029086	CCDC127	GL896211.1:12310-12978	23.9424	12.7379	0.910434	0.0012	0.0151808	20.6676	12.7379	0.698235	0.01205	0.0824205
ENSSSCT00000010206	ENSSSCG00000009316	URAD	chr11:5097305-5105529	26.8622	12.716	1.07893	0.0001	0.00214362	31.9022	12.716	1.32701	5e-05	0.00119245
ENSSSCT00000012512	ENSSSCG00000011432	GLYCTK	chr13:37565169-37571523	26.0541	12.7052	1.03609	5e-05	0.00119245	19.1062	12.7052	0.588622	0.00455	0.0409193
ENSSSCT00000002650	ENSSSCG00000002383	FOS	chr7:104293656-104297121	9.18142	18.8033	-1.0342	0.00015	0.00297337	9.4395	18.8033	-0.994207	0.0002	0.003754
ENSSSCT00000027506	ENSSSCG00000025485	C1orf162	chr4:119057619-119064131	4.3657	12.6846	-1.53879	5e-05	0.00119245	3.36699	12.6846	-1.91355	5e-05	0.00119245
ENSSSCT00000014491	ENSSSCG00000013267	PEX16	chr2:17939948-17958740	29.2751	12.6529	1.21021	0.0015	0.0178968	30.4164	12.6529	1.26538	0.00095	0.0127118
ENSSSCT00000006917	ENSSSCG00000006310	POU2F1	chr4:91272046-91451588	5.65345	12.6325	-1.15993	5e-05	0.00119245	5.2426	12.6325	-1.26878	5e-05	0.00119245
ENSSSCT00000030719	ENSSSCG00000025640	C9orf40	chr1:254937354-254944245	20.3744	12.6265	0.690307	0.0011	0.0142222	17.9398	12.6265	0.506709	0.0144	0.093945
ENSSSCT00000024746	ENSSSCG00000028249	SKA3	chr11:440692-450696	6.42714	12.6024	-0.971448	0.0002	0.003754	5.22501	12.6024	-1.27019	5e-05	0.00119245
ENSSSCT00000025386	ENSSSCG00000023760	CLEC14A	chr7:66529030-66532065	19.0491	12.5722	0.599493	0.00285	0.029011	17.9124	12.5722	0.510725	0.0123	0.0836743
ENSSSCT00000015217	ENSSSCG00000013931	GMIP	chr2:58399688-58409200	8.04958	12.5645	-0.642365	0.0022	0.0238111	8.39026	12.5645	-0.582564	0.00435	0.0396727
ENSSSCT00000014843	ENSSSCG00000013591	TIMM44	chr2:71672157-71688206	21.9398	12.515	0.809893	5e-05	0.00119245	24.8226	12.515	0.987994	5e-05	0.00119245
ENSSSCT00000027942	ENSSSCG00000029371	C5AR1	chr6:48523113-48537524	5.31412	12.5137	-1.2356	5e-05	0.00119245	5.5318	12.5137	-1.17768	5e-05	0.00119245
ENSSSCT00000025763	ENSSSCG00000026446	FAM136A	chr3:75462087-75468524	18.8994	12.4581	0.601254	0.0029	0.0293426	23.7997	12.4581	0.933852	5e-05	0.00119245
ENSSSCT00000016221	ENSSSCG00000014868	EMSY	chr9:11731923-11824724	5.77835	12.4186	-1.10377	5e-05	0.00119245	5.74771	12.4186	-1.11144	5e-05	0.00119245
ENSSSCT00000013520	ENSSSCG00000012363	HEPH	chrX:58894677-58976654	22.1004	12.3937	0.834469	0.04355	0.201989	21.6818	12.3937	0.806878	0.0467	0.211419
ENSSSCT00000004509	ENSSSCG00000004080	MYCT1	chr1:15948006-15948519	6.54913	12.3627	-0.916618	0.00585	0.049169	5.60225	12.3627	-1.14192	0.00185	0.0209924
ENSSSCT00000027711	ENSSSCG00000028346	SAMM50	GL893573.1:715-22898	20.6473	12.3266	0.744181	0.0012	0.0151808	21.4357	12.3266	0.798244	0.0004	0.00655605
ENSSSCT00000024980	ENSSSCG00000029864	EIF1AY	chrY:388423-405535	18.9446	12.2768	0.625851	0.03305	0.167906	27.1464	12.2768	1.14483	5e-05	0.00119245
ENSSSCT00000013661	ENSSSCG00000012494	TIMM8A	chrX:91010562-91013453	18.9961	12.2461	0.633377	0.004	0.0373974	25.8224	12.2461	1.07629	5e-05	0.00119245
ENSSSCT00000005454	ENSSSCG00000004942	TIPIN	chr1:182108935-182125759	7.38717	12.2334	-0.727736	0.0005	0.00778241	6.96765	12.2334	-0.812087	0.00015	0.00297337
ENSSSCT00000002578	ENSSSCG00000002316	COX16	chr7:100173159-100194416	22.8877	12.2278	0.904411	0.0008	0.0111573	23.1199	12.2278	0.918973	0.0007	0.010104
ENSSSCT00000016304	ENSSSCG00000014946	CEP295	chr9:29688041-29799302	20.894	12.2218	0.773629	0.0011	0.0142222	52.9243	12.2218	2.11447	5e-05	0.00119245
ENSSSCT00000032817	ENSSSCG00000012342	MAGED2	chrX:53361028-53369059	21.7199	12.1897	0.833353	0.00455	0.0409193	19.3315	12.1897	0.665293	0.03435	0.172307
ENSSSCT00000009852	ENSSSCG00000008995	LRAT	chr8:78710097-78717666	26.17	12.17	1.10458	5e-05	0.00119245	31.4963	12.17	1.37185	5e-05	0.00119245
ENSSSCT00000011003	ENSSSCG00000010042	ZNF280B	chr14:52311348-52313144	4.70911	12.1318	-1.36526	5e-05	0.00119245	4.22791	12.1318	-1.52077	5e-05	0.00119245
ENSSSCT00000008745	ENSSSCG00000007982	MPG	chr3:40892303-40931888	23.7657	12.1247	0.970929	0.0007	0.010104	24.2804	12.1247	1.00184	0.00055	0.00838524
ENSSSCT00000007396	ENSSSCG00000006751	SIKE1	chr4:115968344-115974919	18.3504	12.1198	0.59844	0.0217	0.125465	17.7555	12.1198	0.550898	0.03415	0.171668
ENSSSCT00000010298	ENSSSCG00000009399	CYSLTR2	chr11:19465519-19487745	7.31663	12.1059	-0.726465	0.0012	0.0151808	6.54332	12.1059	-0.88762	0.0001	0.00214362
ENSSSCT00000013178	ENSSSCG00000012046	SMIM11A	chr13:207814282-207826833	22.0814	12.1003	0.86779	0.0008	0.0111573	21.9335	12.1003	0.858094	0.00115	0.01472
ENSSSCT00000008979	ENSSSCG00000008198	ANKRD39	chr3:59135457-59348054	25.649	12.0827	1.08596	0.01285	0.0864053	24.1736	12.0827	1.00049	0.01945	0.116411
ENSSSCT00000006157	ENSSSCG00000005599	RABEPK	chr1:299672839-299695468	18.9745	12.0496	0.655073	0.00395	0.0370382	16.1962	12.0496	0.426662	0.0582	0.244024
ENSSSCT00000035819	ENSSSCG00000030875	STXBP4	chr12:32116676-32134099	5.60978	11.9661	-1.09294	0.01565	0.0998202	7.15821	11.9661	-0.741281	0.0675	0.269138
ENSSSCT00000007675	ENSSSCG00000007007	IDO1	chr17:10806298-10928870	7.26063	11.9109	-0.714117	0.01695	0.105751	5.59738	11.9109	-1.08946	0.00045	0.00719494
ENSSSCT00000014041	ENSSSCG00000012846	PDDC1	chr2:193623-200363	22.228	11.8518	0.907273	5e-05	0.00119245	26.057	11.8518	1.13657	5e-05	0.00119245
ENSSSCT00000004883	ENSSSCG00000004420	TRAF3IP2	chr1:87048039-87102035	6.72721	11.8195	-0.813091	0.00015	0.00297337	6.54956	11.8195	-0.851702	0.0001	0.00214362
ENSSSCT00000009428	ENSSSCG00000008617	FAM49A	chr3:129216700-129316886	6.60869	11.8176	-0.838507	0.0002	0.003754	6.51661	11.8176	-0.858749	5e-05	0.00119245
ENSSSCT00000000067	ENSSSCG00000000061	PMM1	chr5:4336773-4347697	19.3744	11.8109	0.714032	0.00195	0.0218749	22.5642	11.8109	0.933915	5e-05	0.00119245
ENSSSCT00000032589	ENSSSCG00000030269	B4GALNT2	chr12:25313094-25352176	21.5105	11.7491	0.872497	5e-05	0.00119245	19.2574	11.7491	0.712865	0.00075	0.0106787
ENSSSCT00000031734	ENSSSCG00000022317	SLC38A10	chr12:1374294-1425439	18.3922	11.6553	0.658104	0.00145	0.017463	19.6098	11.6553	0.75059	0.00025	0.00449095
ENSSSCT00000001524	ENSSSCG00000024161	SLA-7	chr7:27614059-27617558	22.262	11.6545	0.933701	0.0204	0.120318	19.7698	11.6545	0.762415	0.05985	0.248532
ENSSSCT00000033751	ENSSSCG00000004194	ENPP3	chr1:35385074-35410213	5.87465	11.6279	-0.985011	0.0023	0.0246104	9.75049	11.6279	-0.254039	0.41085	0.748805
ENSSSCT00000008377	ENSSSCG00000007637	TRIM4	chr3:7077431-7093881	17.4993	11.6211	0.590552	0.00825	0.0629718	22.6709	11.6211	0.964103	5e-05	0.00119245
ENSSSCT00000013984	ENSSSCG00000012792	RENBP	chrX:142227782-142235400	21.733	11.6205	0.903217	0.0001	0.00214362	20.1678	11.6205	0.795387	0.00105	0.0137227
ENSSSCT00000001693	ENSSSCG00000001520	LEMD2	chr7:34641298-34656755	26.7707	11.5957	1.20707	5e-05	0.00119245	29.0937	11.5957	1.32712	5e-05	0.00119245
ENSSSCT00000016888	ENSSSCG00000015501	GPR52	chr9:128323843-128324929	6.94826	11.5853	-0.737569	0.00395	0.0370382	5.40509	11.5853	-1.0999	5e-05	0.00119245
ENSSSCT00000008782	ENSSSCG00000008014	NUBP2	chr3:41631024-41633605	24.272	11.5773	1.068	5e-05	0.00119245	23.8023	11.5773	1.0398	0.0001	0.00214362
ENSSSCT00000018937	ENSSSCG00000017397	MLX	chr12:20462460-20470186	20.0697	11.5673	0.794971	0.00035	0.0058827	23.524	11.5673	1.02409	5e-05	0.00119245
ENSSSCT00000019077	ENSSSCG00000017523	PNPO	chr12:23993277-23997741	23.5507	11.5648	1.02603	0.00015	0.00297337	27.9482	11.5648	1.27301	5e-05	0.00119245
ENSSSCT00000000392	ENSSSCG00000000369	PYM1	chr5:22788900-22790550	22.8099	11.5601	0.980499	5e-05	0.00119245	21.7992	11.5601	0.915114	0.0001	0.00214362
ENSSSCT00000012895	ENSSSCG00000011783	EIF2B5	chr13:131370849-131377493	20.6637	11.5181	0.843197	0.01425	0.0931659	26.7084	11.5181	1.21339	5e-05	0.00119245
ENSSSCT00000010007	ENSSSCG00000009139	PLA2G12A	chr8:120566786-120596415	20.1996	11.4989	0.812834	0.0002	0.003754	17.026	11.4989	0.566246	0.0088	0.0658426
ENSSSCT00000013608	ENSSSCG00000012443	CYSLTR1	chrX:71481818-71482841	6.22873	11.4967	-0.884206	0.001	0.013215	4.88263	11.4967	-1.23549	5e-05	0.00119245
ENSSSCT00000001830	ENSSSCG00000001646	GLTSCR1L	chr7:43344922-43382035	6.2989	11.4811	-0.866092	5e-05	0.00119245	6.62261	11.4811	-0.793792	0.0001	0.00214362
ENSSSCT00000018331	ENSSSCG00000016836	NADK2	chr16:22523648-22574196	18.23	11.4672	0.668805	0.00125	0.015631	16.335	11.4672	0.51046	0.019	0.114499
ENSSSCT00000011635	ENSSSCG00000010638	TCF7L2	chr14:134586335-134788242	4.78824	11.4042	-1.252	5e-05	0.00119245	5.85064	11.4042	-0.962902	5e-05	0.00119245
ENSSSCT00000023287	ENSSSCG00000020809	B3GAT3	chr2:8465234-8470728	17.8579	11.3484	0.654074	0.00235	0.0250032	21.1295	11.3484	0.896766	5e-05	0.00119245
ENSSSCT00000035863	ENSSSCG00000012262	KDM6A	chrX:44567691-44704826	3.11987	11.3439	-1.86236	0.04715	0.212794	2.5207	11.3439	-2.17002	0.0494	0.219648
ENSSSCT00000005612	ENSSSCG00000005092	SLC38A6	chr1:211196362-211293975	6.20241	11.3277	-0.868958	0.01215	0.0828918	5.474	11.3277	-1.04919	0.0028	0.0285611
ENSSSCT00000033540	ENSSSCG00000011393	UBA7	chr13:35509776-35520887	20.1051	11.279	0.833928	0.00325	0.0320922	17.0409	11.279	0.595367	0.03825	0.185192
ENSSSCT00000000589	ENSSSCG00000000546	MANSC4	chr5:49530426-49538224	5.39183	11.22	-1.05723	0.00025	0.00449095	6.08566	11.22	-0.882586	0.0011	0.0142222
ENSSSCT00000001630	ENSSSCG00000020893	TAP1	chr7:29429374-29444130	22.3127	11.1346	1.00281	0.0073	0.0575607	25.0517	11.1346	1.16985	0.00235	0.0250032
ENSSSCT00000000990	ENSSSCG00000000906	TMCC3	chr5:93090346-93100948	16.6957	11.1192	0.586422	0.00965	0.0705685	18.967	11.1192	0.770433	0.0003	0.00520502
ENSSSCT00000027165	ENSSSCG00000028210	NT5C	chr12:6124298-6145548	19.8142	11.1169	0.833782	0.00445	0.0402804	20.3632	11.1169	0.873211	0.0033	0.0324458
ENSSSCT00000033340	ENSSSCG00000015294	CR1	chr9:74510645-74564138	6.44525	11.0814	-0.781833	0.0019	0.0214646	5.524	11.0814	-1.00436	0.0002	0.003754
ENSSSCT00000014050	ENSSSCG00000012854	RASSF7	chr2:341892-344589	16.8992	11.0155	0.617416	0.0029	0.0293426	20.0973	11.0155	0.86746	5e-05	0.00119245
ENSSSCT00000003166	ENSSSCG00000002865	GPATCH1	chr6:38449055-38518966	7.19749	11.0119	-0.613498	0.0037	0.0352729	6.93058	11.0119	-0.668015	0.00155	0.0183734
ENSSSCT00000016698	ENSSSCG00000015325	BET1	chr9:80823452-80833936	17.4509	10.9851	0.66776	0.0026	0.0269681	18.5399	10.9851	0.755087	0.00055	0.00838524
ENSSSCT00000012467	ENSSSCG00000011389	GMPPB	chr13:35429912-35432356	18.2502	10.9844	0.732455	0.0009	0.0122346	23.7754	10.9844	1.11401	5e-05	0.00119245
ENSSSCT00000034720	ENSSSCG00000011314	LZTFL1	chr13:32073760-32093038	3.28272	10.9481	-1.73772	0.0343	0.172124	2.43735	10.9481	-2.1673	0.0459	0.20898
ENSSSCT00000019539	ENSSSCG00000017955	MPDU1	chr12:55289409-55295477	20.2003	10.9379	0.885039	0.00025	0.00449095	19.0378	10.9379	0.799531	0.00045	0.00719494
ENSSSCT00000026406	ENSSSCG00000030229	ABHD14A	chr13:37302371-37307791	19.1855	10.9255	0.812322	0.00025	0.00449095	19.9217	10.9255	0.866641	0.00015	0.00297337
ENSSSCT00000023900	ENSSSCG00000004509	LIPG	chr1:108638411-108667299	5.40717	10.9071	-1.01232	5e-05	0.00119245	5.01171	10.9071	-1.12189	5e-05	0.00119245
ENSSSCT00000005619	ENSSSCG00000005097	SNAPC1	chr1:212192278-212218544	6.29937	10.9011	-0.7912	0.0013	0.0160896	6.98501	10.9011	-0.642145	0.0056	0.0476499
ENSSSCT00000006862	ENSSSCG00000006263	ATP6V1H	chr4:84281793-84340043	16.9179	10.8949	0.6349	0.00395	0.0370382	18.0565	10.8949	0.72887	0.00095	0.0127118
ENSSSCT00000008308	ENSSSCG00000007572	LFNG	chr3:2208307-2216863	17.6577	10.8775	0.698959	0.00065	0.00953497	17.1312	10.8775	0.655289	0.00155	0.0183734
ENSSSCT00000003153	ENSSSCG00000002852	PLEKHF1	chr6:35155532-35156384	18.7477	10.8739	0.785847	0.0015	0.0178968	23.4103	10.8739	1.10628	5e-05	0.00119245
ENSSSCT00000006459	ENSSSCG00000005880	C8orf33	chr4:89448-90614	18.4717	10.871	0.764833	0.0035	0.0339068	22.7127	10.871	1.06302	0.00015	0.00297337
ENSSSCT00000002631	ENSSSCG00000002367	ISCA2	chr7:103582740-103584289	20.1715	10.8475	0.894958	0.0026	0.0269681	22.7696	10.8475	1.06975	0.0003	0.00520502
ENSSSCT00000031994	ENSSSCG00000009834	ATXN2	chr14:34660726-34767837	2.28634	10.7953	-2.23929	5e-05	0.00119245	2.35928	10.7953	-2.19399	0.00035	0.0058827
ENSSSCT00000026025	ENSSSCG00000024791	CD59	chr2:29777109-29797698	17.5132	10.7633	0.702316	0.00185	0.0209924	19.6229	10.7633	0.86641	5e-05	0.00119245
ENSSSCT00000010341	ENSSSCG00000009434	RGCC	chr11:26204987-26215014	19.132	10.7516	0.831433	0.00805	0.0618213	26.2043	10.7516	1.28525	5e-05	0.00119245
ENSSSCT00000007585	ENSSSCG00000024973	GBP5	chr4:139413790-139425247	5.40491	10.7227	-0.988324	5e-05	0.00119245	6.73707	10.7227	-0.670472	0.00775	0.0600435
ENSSSCT00000016718	ENSSSCG00000015345	GLCCI1	chr9:85856737-85940218	6.07165	10.7038	-0.817957	0.0018	0.0205452	6.3097	10.7038	-0.762473	0.0028	0.0285611
ENSSSCT00000034932	ENSSSCG00000012463	CHM	chrX:78754166-79243045	5.47212	10.6882	-0.965844	0.0357	0.176506	5.8393	10.6882	-0.872147	0.0446	0.205089
ENSSSCT00000012549	ENSSSCG00000011467	DENND6A	chr13:43385840-43444265	4.45599	10.6533	-1.25748	0.01355	0.0898377	2.10847	10.6533	-2.33703	0.0289	0.153234
ENSSSCT00000017646	ENSSSCG00000016205	NHEJ1	chr15:134145207-134232523	16.0559	10.6393	0.593704	0.01235	0.0838539	16.249	10.6393	0.610958	0.00955	0.0700293
ENSSSCT00000003129	ENSSSCG00000002828	LPCAT2	chr6:27466764-27524179	6.91484	10.5955	-0.615687	0.00655	0.0533632	5.68048	10.5955	-0.899369	0.00015	0.00297337
ENSSSCT00000009151	ENSSSCG00000008357	SPRED2	chr3:80411732-80444992	4.90243	10.571	-1.10854	5e-05	0.00119245	5.66359	10.571	-0.900317	0.00035	0.0058827
ENSSSCT00000009937	ENSSSCG00000009072	PGRMC2	chr8:103564271-103581675	21.473	10.5595	1.02398	0.00725	0.0572935	19.1661	10.5595	0.860013	0.02225	0.127825
ENSSSCT00000030762	ENSSSCG00000022798	LRRC8B	chr4:139107288-139121900	6.66214	10.5259	-0.659891	0.00095	0.0127118	7.19474	10.5259	-0.548934	0.00465	0.0415674
ENSSSCT00000015394	ENSSSCG00000014093	CRHBP	chr2:87433505-87447099	5.36927	10.5093	-0.968868	0.0007	0.010104	4.71308	10.5093	-1.15692	0.00015	0.00297337
ENSSSCT00000001548	ENSSSCG00000001412	C6orf47	chr7:27476615-27478065	18.955	10.4863	0.854077	5e-05	0.00119245	18.2973	10.4863	0.803134	0.00015	0.00297337
ENSSSCT00000009897	ENSSSCG00000009037	ZNF827	chr8:87915051-88089039	6.9399	10.4642	-0.592476	0.00575	0.0485518	7.53772	10.4642	-0.473261	0.0234	0.13227
ENSSSCT00000024610	ENSSSCG00000028018	EP400	chr14:24748335-24847567	6.48992	10.4507	-0.687327	0.00425	0.0390669	6.86346	10.4507	-0.606593	0.00855	0.0646524
ENSSSCT00000028601	ENSSSCG00000029478	CUL4B	chrX:112928356-112943407	19.6152	10.4187	0.912797	0.011	0.0773554	14.852	10.4187	0.511486	0.1389	0.423007
ENSSSCT00000026621	ENSSSCG00000024907	SDHAF1	chr6:40777927-40779026	22.1201	10.4137	1.08687	5e-05	0.00119245	25.92	10.4137	1.31558	5e-05	0.00119245
ENSSSCT00000002936	ENSSSCG00000002646	TRAPPC2L	chr6:1055727-1059412	27.4504	10.394	1.40107	5e-05	0.00119245	30.8382	10.394	1.56896	5e-05	0.00119245
ENSSSCT00000011281	ENSSSCG00000010308	CHCHD1	chr14:82633938-82636079	17.1261	10.3938	0.720468	0.00145	0.017463	18.6293	10.3938	0.841844	0.0003	0.00520502
ENSSSCT00000014068	ENSSSCG00000012871	FGF19	chr2:2060947-2064674	3.07843	10.3937	-1.75544	0.0001	0.00214362	1.86141	10.3937	-2.48123	5e-05	0.00119245
ENSSSCT00000008939	ENSSSCG00000008162	IL1R1	chr3:54729097-54758580	15.7216	10.3924	0.597219	0.0078	0.0603359	11.1937	10.3924	0.107166	0.62515	0.886715
ENSSSCT00000027390	ENSSSCG00000020871	ARSD	GL896120.1:24014-39297	15.6273	10.3074	0.600383	0.0064	0.0524551	14.0038	10.3074	0.442139	0.04495	0.206121
ENSSSCT00000033291	ENSSSCG00000012569	ATG4A	chrX:102980374-103071239	5.94529	10.2934	-0.791907	0.0141	0.0924402	5.34798	10.2934	-0.944659	0.003	0.0300926
ENSSSCT00000008539	ENSSSCG00000007791	CD2BP2	chr3:18396309-18401680	15.6754	10.2658	0.610656	0.0087	0.0654003	16.7768	10.2658	0.708619	0.002	0.0222139
ENSSSCT00000012373	ENSSSCG00000011302	TMEM42	chr13:30938193-30941915	18.4222	10.2259	0.849216	0.0009	0.0122346	17.7519	10.2259	0.795737	0.0011	0.0142222
ENSSSCT00000016378	ENSSSCG00000015014	ZC3H12C	chr9:42847518-42912936	3.65029	10.2178	-1.485	5e-05	0.00119245	3.4659	10.2178	-1.55978	5e-05	0.00119245
ENSSSCT00000009362	ENSSSCG00000008557	EMILIN1	chr3:119030263-119038488	19.6024	10.1725	0.946353	5e-05	0.00119245	18.8273	10.1725	0.888148	5e-05	0.00119245
ENSSSCT00000008752	ENSSSCG00000007987	DECR2	chr3:41124102-41132446	22.5486	10.1684	1.14895	5e-05	0.00119245	25.5359	10.1684	1.32844	5e-05	0.00119245
ENSSSCT00000007631	ENSSSCG00000006966	CLDN23	chr17:151829-152699	22.0118	10.1643	1.11476	5e-05	0.00119245	25.2871	10.1643	1.31488	5e-05	0.00119245
ENSSSCT00000011046	ENSSSCG00000010085	SDF2L1	chr14:53700110-53702130	19.7701	10.148	0.962124	0.00015	0.00297337	30.0103	10.148	1.56426	5e-05	0.00119245
ENSSSCT00000011540	ENSSSCG00000010548	CHUK	chr14:120756665-120854124	14.6343	25.4883	-0.800476	0.00765	0.0594848	12.8828	25.4883	-0.984384	0.0046	0.0412761
ENSSSCT00000010615	ENSSSCG00000009681	INTS9	chr14:13726697-13790416	4.82541	10.0934	-1.06469	5e-05	0.00119245	5.02304	10.0934	-1.00678	5e-05	0.00119245
ENSSSCT00000000698	ENSSSCG00000000647	OLR1	chr5:64579162-64590512	5.81099	10.07	-0.793207	0.0009	0.0122346	6.17007	10.07	-0.706703	0.00275	0.0281588
ENSSSCT00000029031	ENSSSCG00000028350	LCAT	GL896204.1:80993-84394	16.7482	10.0695	0.734015	0.00175	0.0201145	14.1428	10.0695	0.490081	0.0357	0.176506
ENSSSCT00000027480	ENSSSCG00000023361	MRPS36	chr16:51279801-51301023	22.9257	10.0639	1.18778	5e-05	0.00119245	21.1942	10.0639	1.07448	5e-05	0.00119245
ENSSSCT00000018740	ENSSSCG00000017215	SLC16A5	chr12:6146935-6162468	15.4495	10.0127	0.625722	0.0023	0.0246104	17.4394	10.0127	0.800516	5e-05	0.00119245
ENSSSCT00000023545	ENSSSCG00000021811	GDPD3	GL892764.1:1251-4852	5.98502	9.9993	-0.74047	0.00365	0.0349368	7.13957	9.9993	-0.48599	0.0465	0.210856
ENSSSCT00000022853	ENSSSCG00000021442	FCF1	chr7:103783792-103805586	5.62629	9.98011	-0.82687	0.00015	0.00297337	5.63555	9.98011	-0.8245	0.0001	0.00214362
ENSSSCT00000002930	ENSSSCG00000002640	DEF8	chr6:285351-369193	15.5359	9.96071	0.641284	0.02915	0.154036	15.8974	9.96071	0.674474	0.01995	0.118363
ENSSSCT00000002154	ENSSSCG00000001925	ADPGK	chr7:65276524-65285118	16.0867	9.92053	0.697378	0.00445	0.0402804	16.6375	9.92053	0.745951	0.0025	0.0262156
ENSSSCT00000014175	ENSSSCG00000012968	CCDC85B	chr2:5534024-5541866	19.2046	9.884	0.958282	0.0028	0.0285611	20.8732	9.884	1.07848	0.00055	0.00838524
ENSSSCT00000000563	ENSSSCG00000000521	PHLDA1	chr5:42877525-42878692	6.4344	9.84769	-0.61398	0.01665	0.10448	5.82427	9.84769	-0.757708	0.00475	0.0422547
ENSSSCT00000005166	ENSSSCG00000004679	SORD	chr1:141257111-141301015	15.6739	9.81574	0.675197	0.0008	0.0111573	17.9642	9.81574	0.871955	5e-05	0.00119245
ENSSSCT00000003719	ENSSSCG00000003350	MIB2	chr6:58219212-58230000	17.6476	9.80966	0.847193	0.0001	0.00214362	18.9811	9.80966	0.952286	5e-05	0.00119245
ENSSSCT00000009637	ENSSSCG00000008807	GUF1	chr8:36876644-36897342	5.27608	9.7935	-0.892358	0.0001	0.00214362	4.75824	9.7935	-1.0414	5e-05	0.00119245
ENSSSCT00000008768	ENSSSCG00000008000	RPUSD1	chr3:41465702-41468134	15.1334	9.79047	0.628283	0.01055	0.0750904	14.5862	9.79047	0.575158	0.0177	0.109121
ENSSSCT00000025314	ENSSSCG00000021180	POLR2K	chr4:39764914-39768384	21.71	9.78945	1.14906	5e-05	0.00119245	19.5783	9.78945	0.999956	5e-05	0.00119245
ENSSSCT00000017156	ENSSSCG00000015755	AGPAT5	chr15:43013893-43063599	16.0555	9.75879	0.718291	0.00215	0.0234086	16.7598	9.75879	0.780228	0.0007	0.010104
ENSSSCT00000003518	ENSSSCG00000003168	ALDH16A1	chr6:50253126-50275377	19.4446	9.7454	0.996579	0.0002	0.003754	22.7281	9.7454	1.22169	5e-05	0.00119245
ENSSSCT00000011528	ENSSSCG00000010538	NKX2-3	chr14:120166269-120169121	15.8238	9.74244	0.699745	0.003	0.0300926	15.4878	9.74244	0.668782	0.00355	0.034246
ENSSSCT00000003856	ENSSSCG00000003470	FAM131C	chr6:69529631-69545560	17.3877	9.73049	0.837483	0.0002	0.003754	21.7804	9.73049	1.16245	5e-05	0.00119245
ENSSSCT00000019100	ENSSSCG00000017546	ZNF652	chr12:25435508-25451001	6.09626	9.71803	-0.672739	0.0045	0.0405666	5.85162	9.71803	-0.731829	0.00245	0.025797
ENSSSCT00000018940	ENSSSCG00000017400	NAGLU	chr12:20485255-20492511	14.7721	9.70584	0.605954	0.004	0.0373974	13.6555	9.70584	0.492556	0.0211	0.123041
ENSSSCT00000008515	ENSSSCG00000007768	STX4	chr3:17752488-17761997	15.8618	9.6788	0.712654	0.001	0.013215	16.8511	9.6788	0.799945	0.00015	0.00297337
ENSSSCT00000035996	ENSSSCG00000006413	FCER1A	chr4:99069232-99075661	3.66492	9.67828	-1.40097	0.0477	0.214519	2.31809	9.67828	-2.06182	0.043	0.200178
ENSSSCT00000000314	ENSSSCG00000000293	ITGA5	chr5:20442127-20465312	14.7116	9.67721	0.604288	0.0073	0.0575607	14.2582	9.67721	0.559133	0.01015	0.0730396
ENSSSCT00000003666	ENSSSCG00000003302	TMEM86B	chr6:54419746-54421705	21.0561	9.6623	1.1238	5e-05	0.00119245	23.8461	9.6623	1.30332	5e-05	0.00119245
ENSSSCT00000011084	ENSSSCG00000010123	CLDN5	chr14:54778677-54779334	17.4822	9.58597	0.866891	0.0017	0.0196705	17.7542	9.58597	0.889166	0.00125	0.015631
ENSSSCT00000012478	ENSSSCG00000011400	SEMA3B	chr13:35921156-35928150	18.9281	9.56537	0.98464	5e-05	0.00119245	21.5725	9.56537	1.1733	5e-05	0.00119245
ENSSSCT00000006358	ENSSSCG00000005782	TM2D3	chr1:311079769-311091656	14.5809	9.55463	0.609812	0.0107	0.0757871	14.3395	9.55463	0.585725	0.01295	0.0869498
ENSSSCT00000017007	ENSSSCG00000015613	C1orf74	chr9:146263787-146265474	19.5122	9.53735	1.03271	0.0001	0.00214362	20.2014	9.53735	1.08279	5e-05	0.00119245
ENSSSCT00000031752	ENSSSCG00000022265	C19orf25	chr2:77891285-77895615	16.5043	9.53448	0.79162	0.00025	0.00449095	18.3924	9.53448	0.947884	5e-05	0.00119245
ENSSSCT00000033348	ENSSSCG00000012124	TRAPPC2	chrX:11304508-11319848	14.7072	9.52919	0.626101	0.01145	0.0796447	12.2691	9.52919	0.364608	0.14185	0.428321
ENSSSCT00000011312	ENSSSCG00000010334	SFTPD	chr14:88660303-88675023	20.9288	9.52816	1.13522	0.00205	0.02262	20.8362	9.52816	1.12882	0.00205	0.02262
ENSSSCT00000031972	ENSSSCG00000029990	DEFB1	chr15:43346317-43357071	19.1992	9.48904	1.01671	0.0035	0.0339068	38.9416	9.48904	2.03698	5e-05	0.00119245
ENSSSCT00000024875	ENSSSCG00000022409	DNASE1L1	GL896119.1:1089-4981	14.3688	9.4807	0.599873	0.0116	0.08033	17.5431	9.4807	0.88784	0.00045	0.00719494
ENSSSCT00000014319	ENSSSCG00000013099	MS4A2	chr2:10959669-10979661	2.83024	9.36177	-1.72586	5e-05	0.00119245	1.96713	9.36177	-2.25069	5e-05	0.00119245
ENSSSCT00000018719	ENSSSCG00000017194	TEN1	chr12:5386514-5399934	21.4061	9.36071	1.19333	0.0022	0.0238111	20.2072	9.36071	1.11018	0.00435	0.0396727
ENSSSCT00000001143	ENSSSCG00000001049	HIVEP1	chr7:8920529-9065107	5.96206	9.29307	-0.640344	0.00475	0.0422547	5.74482	9.29307	-0.693894	0.0022	0.0238111
ENSSSCT00000027163	ENSSSCG00000024182	TRADD	GL896501.1:3468-6207	15.9912	9.28888	0.783699	0.00085	0.0116991	18.1558	9.28888	0.966857	5e-05	0.00119245
ENSSSCT00000027702	ENSSSCG00000028813	SFTA2	chr7:27142712-27143699	31.2843	9.27978	1.75328	5e-05	0.00119245	32.0945	9.27978	1.79016	5e-05	0.00119245
ENSSSCT00000017202	ENSSSCG00000015798	ANKRD37	chr15:53346644-53349699	5.47775	9.267	-0.758519	0.0075	0.0586606	5.50735	9.267	-0.750743	0.00795	0.0612519
ENSSSCT00000000102	ENSSSCG00000000096	JOSD1	chr5:6566811-6576275	15.7939	9.25482	0.771092	0.00835	0.0635229	19.8257	9.25482	1.0991	0.0003	0.00520502
ENSSSCT00000006083	ENSSSCG00000005532	MRRF	chr1:294661291-294714165	16.0282	9.21974	0.797812	0.0003	0.00520502	15.4876	9.21974	0.748315	0.00045	0.00719494
ENSSSCT00000019467	ENSSSCG00000017890	KIAA0753	chr12:52741874-52792162	5.4904	9.21585	-0.747206	0.0002	0.003754	5.51025	9.21585	-0.741998	0.00035	0.0058827
ENSSSCT00000023503	ENSSSCG00000024933	SLC36A4	chr9:28983530-29033257	5.25921	9.18886	-0.805041	0.0002	0.003754	3.82649	9.18886	-1.26386	5e-05	0.00119245
ENSSSCT00000027810	ENSSSCG00000029774	RNF7	chr13:90378309-90386009	14.6715	9.18032	0.676399	0.0013	0.0160896	14.507	9.18032	0.660129	0.00175	0.0201145
ENSSSCT00000033285	ENSSSCG00000025984	TTLL5	chr7:104990612-105175649	4.07112	9.17324	-1.17201	0.00065	0.00953497	4.00885	9.17324	-1.19424	0.00045	0.00719494
ENSSSCT00000023558	ENSSSCG00000012334	TSR2	chrX:53043933-53088165	23.9472	9.16346	1.38589	5e-05	0.00119245	25.5371	9.16346	1.47863	5e-05	0.00119245
ENSSSCT00000032425	ENSSSCG00000020675	ATF7IP2	chr3:33325593-33378470	5.64696	9.16066	-0.697977	0.0025	0.0262156	5.83162	9.16066	-0.651556	0.00635	0.0521455
ENSSSCT00000010899	ENSSSCG00000009947	CMKLR1	chr14:44964239-45118925	4.92835	9.14114	-0.89127	0.0012	0.0151808	4.73117	9.14114	-0.950175	0.0007	0.010104
ENSSSCT00000005515	ENSSSCG00000005000	FANCM	chr1:195220254-195286683	5.60353	9.13681	-0.705354	0.00085	0.0116991	5.96445	9.13681	-0.615301	0.0045	0.0405666
ENSSSCT00000017273	ENSSSCG00000015862	LIMS2	chr15:66435455-66453016	17.7379	9.12501	0.958933	0.0001	0.00214362	14.0984	9.12501	0.627635	0.00535	0.0461548
ENSSSCT00000030461	ENSSSCG00000021964	PIK3R1	chr16:50135842-50164238	3.67109	9.11866	-1.31261	5e-05	0.00119245	3.44489	9.11866	-1.40436	5e-05	0.00119245
ENSSSCT00000003956	ENSSSCG00000003562	SFN	chr6:77758723-77761148	3.88845	9.11516	-1.22907	0.0003	0.00520502	6.57022	9.11516	-0.472326	0.1229	0.393102
ENSSSCT00000033933	ENSSSCG00000005950	PHF20L1	chr4:8439107-8510612	3.95921	9.09261	-1.19948	0.02505	0.138501	3.66236	9.09261	-1.31192	0.0165	0.103773
ENSSSCT00000013301	ENSSSCG00000012160	SH3KBP1	chrX:17137917-17492926	3.66164	9.07951	-1.31013	0.0172	0.106862	4.08356	9.07951	-1.15279	0.03005	0.157144
ENSSSCT00000019502	ENSSSCG00000017919	MED11	chr12:54269859-54271528	19.8663	9.04553	1.13504	5e-05	0.00119245	21.072	9.04553	1.22005	5e-05	0.00119245
ENSSSCT00000035845	ENSSSCG00000015567	FAM129A	chr9:138454825-138618213	5.74425	9.03986	-0.654183	0.0163	0.102859	5.11376	9.03986	-0.821915	0.00145	0.017463
ENSSSCT00000005356	ENSSSCG00000004852	NSMCE3	chr1:160546164-160547001	16.246	8.99417	0.853021	0.0014	0.0169856	18.8949	8.99417	1.07094	5e-05	0.00119245
ENSSSCT00000017154	ENSSSCG00000015753	ANGPT2	chr15:42662742-42787678	4.96334	8.97588	-0.854742	0.0229	0.130307	5.0457	8.97588	-0.831	0.0303	0.158025
ENSSSCT00000012822	ENSSSCG00000011712	P2RY14	chr13:99455567-99459646	5.32096	8.95365	-0.750788	0.00335	0.0328264	5.13246	8.95365	-0.802826	0.0021	0.0230209
ENSSSCT00000006712	ENSSSCG00000006120	OTUD6B	chr4:49397920-49425248	13.8692	8.92984	0.635179	0.02885	0.15307	12.9627	8.92984	0.537663	0.06065	0.250779
ENSSSCT00000009511	ENSSSCG00000008693	NOP14	chr8:1298933-1369770	13.9836	8.89222	0.653116	0.00205	0.02262	15.3686	8.89222	0.789367	0.00015	0.00297337
ENSSSCT00000014301	ENSSSCG00000013083	CPSF7	chr2:9622388-9653319	5.86514	8.86453	-0.595878	0.02505	0.138501	6.46814	8.86453	-0.454694	0.0962	0.337253
ENSSSCT00000019154	ENSSSCG00000017593	UTP18	chr12:27594682-27633765	14.0293	8.86062	0.662964	0.0016	0.018837	15.0756	8.86062	0.766737	0.00015	0.00297337
ENSSSCT00000023715	ENSSSCG00000029613	SYNM	chr1:154019850-154044632	30.0201	8.85837	1.76082	5e-05	0.00119245	20.2726	8.85837	1.19442	5e-05	0.00119245
ENSSSCT00000025805	ENSSSCG00000025733	IMPA1	GL893852.2:23551-44015	13.5101	8.8452	0.611074	0.0174	0.107812	15.5304	8.8452	0.812125	0.00215	0.0234086
ENSSSCT00000016117	ENSSSCG00000014766	OR51E1	chr9:6108839-6109793	3.80778	8.81995	-1.21182	0.0001	0.00214362	3.3422	8.81995	-1.39997	5e-05	0.00119245
ENSSSCT00000032549	ENSSSCG00000030673	BLOC1S4	chr8:3145172-3145832	15.069	8.80934	0.774477	0.00475	0.0422547	19.9305	8.80934	1.17787	5e-05	0.00119245
ENSSSCT00000031255	ENSSSCG00000027189	PPP1R12C	chr6:54318795-54340478	15.0393	8.809	0.771683	0.00025	0.00449095	16.1735	8.809	0.876577	5e-05	0.00119245
ENSSSCT00000005694	ENSSSCG00000005166	MLLT3	chr1:225900121-226359741	5.54943	8.79043	-0.663595	0.00115	0.01472	4.59952	8.79043	-0.934451	5e-05	0.00119245
ENSSSCT00000035312	ENSSSCG00000002917	NFKBID	chr6:40700570-40709110	4.72448	8.78212	-0.894413	0.005	0.043935	5.06896	8.78212	-0.792878	0.013	0.0871757
ENSSSCT00000014277	ENSSSCG00000013061	EML3	chr2:8472958-8483052	13.8162	8.77287	0.655238	0.0017	0.0196705	14.0939	8.77287	0.683951	0.00115	0.01472
ENSSSCT00000032517	ENSSSCG00000023373	ZNHIT3	chr12:39584264-39590233	14.5843	8.76894	0.733946	0.01675	0.104902	14.4572	8.76894	0.721319	0.0193	0.115686
ENSSSCT00000028950	ENSSSCG00000021678	CTCF	JH118995.1:47579-71041	5.62126	8.76037	-0.640096	0.0043	0.0393907	5.72209	8.76037	-0.61445	0.0065	0.0530437
ENSSSCT00000023362	ENSSSCG00000021734	GPR174	chrX:72635873-72638570	4.96418	8.74879	-0.817527	0.0003	0.00520502	4.21376	8.74879	-1.05398	5e-05	0.00119245
ENSSSCT00000009811	ENSSSCG00000008957	AMCF-II	chr8:74159969-74162170	5.8118	8.73625	-0.58803	0.0334	0.169106	6.08827	8.73625	-0.520983	0.0541	0.233252
ENSSSCT00000019075	ENSSSCG00000017521	SCRN2	chr12:23968529-23972991	19.8713	8.69515	1.19241	5e-05	0.00119245	22.1608	8.69515	1.34973	5e-05	0.00119245
ENSSSCT00000017674	ENSSSCG00000016232	MRPL44	chr15:139167794-139175783	15.2388	8.65435	0.816251	0.0001	0.00214362	16.7522	8.65435	0.952857	5e-05	0.00119245
ENSSSCT00000012430	ENSSSCG00000011353	PFKFB4	chr13:34459110-34500668	13.7111	8.65379	0.663945	0.00295	0.0297356	14.7403	8.65379	0.768358	0.0006	0.00895758
ENSSSCT00000004333	ENSSSCG00000003918	TOE1	chr6:153408230-153411931	13.2688	8.63236	0.620207	0.0039	0.0367092	13.6711	8.63236	0.663303	0.0022	0.0238111
ENSSSCT00000008869	ENSSSCG00000008096	ZC3H6	chr3:45682450-45717528	5.49809	8.62173	-0.649048	0.00235	0.0250032	4.61605	8.62173	-0.901318	0.0001	0.00214362
ENSSSCT00000019080	ENSSSCG00000017526	COPZ2	chr12:24277884-24292012	13.5549	8.59336	0.657521	0.01415	0.0926446	12.773	8.59336	0.571804	0.03445	0.172498
ENSSSCT00000001739	ENSSSCG00000001560	C6orf222	chr7:36937622-36949206	16.6432	8.58032	0.955826	5e-05	0.00119245	14.1472	8.58032	0.721416	0.0011	0.0142222
ENSSSCT00000018871	ENSSSCG00000017335	HEXIM2	chr12:18500337-18504937	17.2211	8.57605	1.00579	5e-05	0.00119245	17.9235	8.57605	1.06347	5e-05	0.00119245
ENSSSCT00000008273	ENSSSCG00000007541	PDGFA	chr3:154799-169916	14.9183	8.5737	0.79909	0.0008	0.0111573	14.7878	8.5737	0.786421	0.00095	0.0127118
ENSSSCT00000027349	ENSSSCG00000023929	TXNRD3	chr13:80680405-80717889	14.7025	8.55143	0.781826	0.00055	0.00838524	15.7612	8.55143	0.882136	0.0001	0.00214362
ENSSSCT00000003050	ENSSSCG00000002753	NOB1	chr6:16181440-16193106	13.853	8.55078	0.696073	0.0021	0.0230209	14.6351	8.55078	0.775304	0.0007	0.010104
ENSSSCT00000029306	ENSSSCG00000025005	B4GALT6	chr6:108153076-108219519	4.20223	8.54418	-1.02379	5e-05	0.00119245	4.33565	8.54418	-0.978691	5e-05	0.00119245
ENSSSCT00000004521	ENSSSCG00000004090	ZBTB2	chr1:17296718-17305906	5.30267	8.52252	-0.684561	0.0017	0.0196705	5.12289	8.52252	-0.734322	0.00055	0.00838524
ENSSSCT00000036512	ENSSSCG00000012234	SRPX	chrX:37892766-37949871	13.1637	8.52041	0.627565	0.00725	0.0572935	14.3791	8.52041	0.754983	0.0012	0.0151808
ENSSSCT00000003448	ENSSSCG00000003109	TMEM160	chr6:48248386-48251217	21.2227	8.5079	1.31873	5e-05	0.00119245	26.7805	8.5079	1.65431	5e-05	0.00119245
ENSSSCT00000019380	ENSSSCG00000017807	GLOD4	chr12:49243793-49269237	16.0068	8.45231	0.921266	0.00055	0.00838524	18.296	8.45231	1.11411	0.0001	0.00214362
ENSSSCT00000005463	ENSSSCG00000004951	AAGAB	chr1:182853800-182893684	14.7273	8.39573	0.81077	0.0001	0.00214362	15.0782	8.39573	0.844735	5e-05	0.00119245
ENSSSCT00000006545	ENSSSCG00000005962	GSDMC	chr4:11095051-11113125	21.4657	8.35812	1.36078	5e-05	0.00119245	17.5766	8.35812	1.07241	5e-05	0.00119245
ENSSSCT00000013840	ENSSSCG00000012659	ZNF280C	chrX:122503579-122564169	1.2811	8.35439	-2.70515	0.00105	0.0137227	1.08125	8.35439	-2.94984	0.00015	0.00297337
ENSSSCT00000008554	ENSSSCG00000007806	RABEP2	chr3:18733278-18771442	16.0277	8.35099	0.940545	5e-05	0.00119245	15.9132	8.35099	0.930204	5e-05	0.00119245
ENSSSCT00000027226	ENSSSCG00000010521	UBTD1	chr14:118390693-118447182	14.1766	8.34955	0.76374	0.0007	0.010104	13.6025	8.34955	0.704102	0.00135	0.0165389
ENSSSCT00000024936	ENSSSCG00000029408	ZFP30	chr6:42163690-42305388	12.5855	8.33315	0.594828	0.0036	0.0345772	11.3919	8.33315	0.451079	0.0268	0.14513
ENSSSCT00000006323	ENSSSCG00000005751	COL5A1	chr1:308064162-308174334	19.6602	8.33305	1.23836	5e-05	0.00119245	21.5672	8.33305	1.37192	5e-05	0.00119245
ENSSSCT00000012183	ENSSSCG00000011131	PRKCQ	chr10:70509345-70658589	4.98813	8.3296	-0.739748	0.0022	0.0238111	3.94414	8.3296	-1.07854	5e-05	0.00119245
ENSSSCT00000003409	ENSSSCG00000003072	ZNF573	chr6:46472681-46489035	14.6027	8.31312	0.812772	0.0002	0.003754	14.5781	8.31312	0.810337	0.0003	0.00520502
ENSSSCT00000003971	ENSSSCG00000003577	WASF2	chr6:78196521-78289075	4.10092	8.31304	-1.01943	0.0227	0.129549	4.52679	8.31304	-0.876888	0.06945	0.273841
ENSSSCT00000026588	ENSSSCG00000023142	GAMT	chr2:77968840-77972112	14.0079	8.28808	0.757133	0.00145	0.017463	13.1082	8.28808	0.661358	0.0061	0.0507239
ENSSSCT00000001939	ENSSSCG00000001734	C6orf141	chr7:49983167-49983749	22.0655	8.27665	1.41467	5e-05	0.00119245	32.2168	8.27665	1.96069	5e-05	0.00119245
ENSSSCT00000008184	ENSSSCG00000007477	NFATC2	chr17:59183329-59332006	3.69813	8.26601	-1.16039	0.0205	0.120664	2.95958	8.26601	-1.4818	0.0071	0.0564708
ENSSSCT00000011147	ENSSSCG00000010181	C1orf198	chr14:64181765-64215461	13.2853	8.25736	0.686079	0.0086	0.0649308	12.318	8.25736	0.577017	0.02645	0.143855
ENSSSCT00000006206	ENSSSCG00000005644	SWI5	chr1:302710778-302716875	14.4704	8.24873	0.810865	0.0021	0.0230209	15.352	8.24873	0.896181	0.00075	0.0106787
ENSSSCT00000012397	ENSSSCG00000011322	CCR1	chr13:32323641-32330286	5.12092	8.24278	-0.686727	0.00605	0.0504261	4.87013	8.24278	-0.759169	0.00255	0.0266091
ENSSSCT00000000082	ENSSSCG00000000076	SGSM3	chr5:5208977-5250358	13.5647	8.22187	0.722319	0.00135	0.0165389	15.4302	8.22187	0.908222	5e-05	0.00119245
ENSSSCT00000007814	ENSSSCG00000007142	PANK2	chr17:36143506-36169748	14.0593	8.18532	0.780413	0.00015	0.00297337	15.6298	8.18532	0.933187	5e-05	0.00119245
ENSSSCT00000007788	ENSSSCG00000007116	CD93	chr17:34381625-34384902	12.863	8.18088	0.652904	0.002	0.0222139	12.8033	8.18088	0.646184	0.00245	0.025797
ENSSSCT00000015108	ENSSSCG00000013830	ILVBL	chr2:61996374-62014992	18.9095	8.17794	1.2093	5e-05	0.00119245	22.0862	8.17794	1.43334	5e-05	0.00119245
ENSSSCT00000019304	ENSSSCG00000017737	RNF135	chr12:44417874-44431444	12.8316	8.16636	0.651935	0.00555	0.0473756	11.9796	8.16636	0.552819	0.01885	0.113874
ENSSSCT00000007575	ENSSSCG00000006917	LRRC8C	chr4:138996945-139077605	5.38462	8.16601	-0.600786	0.00325	0.0320922	5.18818	8.16601	-0.654401	0.00115	0.01472
ENSSSCT00000033051	ENSSSCG00000005955	EFR3A	chr4:9089639-9130605	3.08875	8.11871	-1.39423	0.00025	0.00449095	2.13587	8.11871	-1.92642	5e-05	0.00119245
ENSSSCT00000008278	ENSSSCG00000007546	C7orf50	chr3:723520-743194	16.7216	8.09991	1.04573	5e-05	0.00119245	18.6894	8.09991	1.20624	5e-05	0.00119245
ENSSSCT00000013018	ENSSSCG00000011896	ADPRH	chr13:150005103-150011761	14.0436	8.09052	0.795606	0.00015	0.00297337	12.4132	8.09052	0.617573	0.0041	0.0380764
ENSSSCT00000026992	ENSSSCG00000024995	UQCC3	chr2:8423617-8424305	17.2831	8.0898	1.09518	0.046	0.209301	23.3268	8.0898	1.52781	0.00505	0.0442407
ENSSSCT00000006554	ENSSSCG00000005971	ZNF572	chr4:15295034-15299389	5.18363	8.06993	-0.638594	0.0084	0.0638047	5.06712	8.06993	-0.67139	0.00825	0.0629718
ENSSSCT00000016351	ENSSSCG00000014988	MMP13	chr9:37493635-37504552	2.58183	8.05044	-1.64067	5e-05	0.00119245	2.48115	8.05044	-1.69806	5e-05	0.00119245
ENSSSCT00000036248	ENSSSCG00000014048	HK3	chr2:82651077-82669061	4.26624	8.04531	-0.915182	0.01455	0.0945861	4.16116	8.04531	-0.95116	0.0126	0.0852168
ENSSSCT00000010605	ENSSSCG00000009672	SCARA5	chr14:12845866-12978045	13.032	8.01493	0.701296	0.00085	0.0116991	15.2862	8.01493	0.931465	5e-05	0.00119245
ENSSSCT00000006506	ENSSSCG00000005926	PARP10	chr4:790064-797030	17.4669	7.98324	1.12957	5e-05	0.00119245	16.8597	7.98324	1.07853	5e-05	0.00119245
ENSSSCT00000010080	ENSSSCG00000009206	GPRIN3	chr8:139330554-139332882	4.79302	7.96979	-0.733607	0.0021	0.0230209	3.96635	7.96979	-1.00673	0.0001	0.00214362
ENSSSCT00000024920	ENSSSCG00000021102	MAEA	GL896277.1:7720-15835	3.97759	7.94119	-0.997461	0.0007	0.010104	2.86935	7.94119	-1.46863	5e-05	0.00119245
ENSSSCT00000009730	ENSSSCG00000008887	NAF1	chr8:55108279-55148770	4.7467	7.92667	-0.73979	0.00225	0.0242293	5.22471	7.92667	-0.601364	0.0106	0.0753541
ENSSSCT00000006424	ENSSSCG00000005845	TOR4A	chr1:314112196-314114510	12.1271	7.90125	0.618085	0.0088	0.0658426	13.4697	7.90125	0.769567	0.00095	0.0127118
ENSSSCT00000028835	ENSSSCG00000024712	APCDD1	GL893427.2:1797-14528	3.44841	7.89841	-1.19563	0.00315	0.0312883	2.83571	7.89841	-1.47785	0.00105	0.0137227
ENSSSCT00000006505	ENSSSCG00000005925	EXOSC4	chr4:828883-831320	12.0877	7.86432	0.620143	0.0088	0.0658426	13.3077	7.86432	0.758863	0.00115	0.01472
ENSSSCT00000003852	ENSSSCG00000003466	TMEM82	chr6:69386314-69388274	20.4901	7.83474	1.38697	5e-05	0.00119245	20.312	7.83474	1.37437	5e-05	0.00119245
ENSSSCT00000004030	ENSSSCG00000003634	ADPRHL2	chr6:85528198-85534297	17.627	7.8288	1.17092	5e-05	0.00119245	19.8777	7.8288	1.34429	5e-05	0.00119245
ENSSSCT00000022557	ENSSSCG00000024162	IMPA2	chr6:90749826-90770377	12.4091	7.81221	0.667599	0.0026	0.0269681	12.7451	7.81221	0.706141	0.0006	0.00895758
ENSSSCT00000011032	ENSSSCG00000010071	MMP11	chr14:53349977-53359818	14.8009	7.80692	0.922859	5e-05	0.00119245	14.9486	7.80692	0.937184	5e-05	0.00119245
ENSSSCT00000027556	ENSSSCG00000028025	WDR74	chr2:8276731-8282140	15.8808	7.80429	1.02495	0.0001	0.00214362	19.326	7.80429	1.3082	5e-05	0.00119245
ENSSSCT00000032864	ENSSSCG00000004520	MAPK4	chr1:110082309-110155111	4.61245	7.78429	-0.755032	0.00165	0.0192591	4.49435	7.78429	-0.792454	0.00105	0.0137227
ENSSSCT00000025770	ENSSSCG00000020932	CANT1	GL894007.1:7700-11235	12.0954	7.75247	0.641731	0.01115	0.0780671	12.6215	7.75247	0.703156	0.0065	0.0530437
ENSSSCT00000017548	ENSSSCG00000016117	CARF	chr15:117869021-117914168	5.1131	7.74973	-0.599947	0.0042	0.038713	4.80009	7.74973	-0.691084	0.00085	0.0116991
ENSSSCT00000008728	ENSSSCG00000007965	ZNF200	chr3:40341625-40357364	4.94176	7.73566	-0.646499	0.0187	0.113353	5.1156	7.73566	-0.596621	0.02135	0.124013
ENSSSCT00000022629	ENSSSCG00000025932	AP1S3	GL893592.2:34538-51784	12.1946	7.73404	0.656945	0.0091	0.067605	10.3304	7.73404	0.417605	0.0961	0.336995
ENSSSCT00000028852	ENSSSCG00000025876	PBLD	chr14:77502555-77528898	13.9255	7.73343	0.848548	0.0003	0.00520502	8.26051	7.73343	0.0951226	0.6802	0.911086
ENSSSCT00000009817	ENSSSCG00000008962	EREG	chr8:74515114-74519617	2.90107	7.72832	-1.41357	0.00195	0.0218749	3.4955	7.72832	-1.14465	0.01165	0.0805629
ENSSSCT00000003865	ENSSSCG00000003479	MFAP2	chr6:69920823-69928175	4.87068	7.72382	-0.665193	0.01425	0.0931659	5.30839	7.72382	-0.54104	0.0454	0.207516
ENSSSCT00000006177	ENSSSCG00000005617	STXBP1	chr1:302057982-302090174	4.92567	7.71915	-0.648122	0.01005	0.0724749	4.83823	7.71915	-0.673962	0.0077	0.0597357
ENSSSCT00000009741	ENSSSCG00000008898	HOPX	chr8:57628887-57634389	12.7012	7.71191	0.719802	0.00525	0.045513	10.8208	7.71191	0.488644	0.0539	0.232656
ENSSSCT00000035165	ENSSSCG00000000475	IRAK3	chr5:33800190-33872499	4.61992	7.69121	-0.735342	0.0045	0.0405666	3.8186	7.69121	-1.01017	0.00015	0.00297337
ENSSSCT00000019376	ENSSSCG00000017803	TIMM22	chr12:49040983-49046565	12.6834	7.68576	0.722683	0.00305	0.0305033	17.1121	7.68576	1.15476	5e-05	0.00119245
ENSSSCT00000000275	ENSSSCG00000000256	ZNF740	chr5:18823746-18826349	14.0484	7.65761	0.875437	0.00465	0.0415674	16.1192	7.65761	1.07381	0.00065	0.00953497
ENSSSCT00000015440	ENSSSCG00000014136	VCAN	chr2:93783041-93895497	3.11656	7.64674	-1.29489	0.0058	0.0488708	2.76661	7.64674	-1.46672	0.01455	0.0945861
ENSSSCT00000013985	ENSSSCG00000012793	HCFC1	chrX:142237946-142264235	2.88703	7.63201	-1.40248	0.0045	0.0405666	3.62572	7.63201	-1.07379	0.01995	0.118363
ENSSSCT00000019360	ENSSSCG00000017788	TP53I13	chr12:47714657-47718800	11.4507	7.58492	0.594234	0.0118	0.0813015	11.1658	7.58492	0.557881	0.0178	0.109527
ENSSSCT00000004362	ENSSSCG00000003943	MED8	chr6:155345965-155365853	14.9891	7.57779	0.984061	5e-05	0.00119245	16.5872	7.57779	1.13022	5e-05	0.00119245
ENSSSCT00000001345	ENSSSCG00000001235	TRIM15	chr7:24833170-24844895	12.4326	7.56959	0.715843	0.001	0.013215	14.2256	7.56959	0.910199	5e-05	0.00119245
ENSSSCT00000015349	ENSSSCG00000014051	TSPAN17	chr2:82867848-82878311	13.1015	7.55364	0.794485	0.00055	0.00838524	12.5377	7.55364	0.73103	0.00105	0.0137227
ENSSSCT00000023671	ENSSSCG00000027710	PDZD3	chr9:51436619-51441363	24.7985	7.54965	1.71577	5e-05	0.00119245	26.643	7.54965	1.81927	5e-05	0.00119245
ENSSSCT00000002663	ENSSSCG00000002395	TMED8	chr7:106527386-106537905	12.5569	7.52374	0.738954	0.00485	0.0429592	14.5508	7.52374	0.951578	0.00025	0.00449095
ENSSSCT00000024573	ENSSSCG00000027974	MRPL50	chr1:271654111-271660594	13.9774	7.5148	0.895292	5e-05	0.00119245	14.5002	7.5148	0.948265	5e-05	0.00119245
ENSSSCT00000002040	ENSSSCG00000001821	UNC45A	chr7:58562240-58577216	12.5091	7.47969	0.741925	0.0005	0.00778241	14.143	7.47969	0.919043	5e-05	0.00119245
ENSSSCT00000006487	ENSSSCG00000005907	ADCK5	chr4:482151-498969	17.8846	7.43525	1.26626	5e-05	0.00119245	19.366	7.43525	1.38107	5e-05	0.00119245
ENSSSCT00000011037	ENSSSCG00000010076	ZNF70	chr14:53376580-53377927	3.52097	7.43196	-1.07777	0.0001	0.00214362	4.38899	7.43196	-0.759853	0.0056	0.0476499
ENSSSCT00000007310	ENSSSCG00000026938	HIST2H2AA4	chr4:108824928-108825321	22.6752	7.4098	1.61361	0.0023	0.0246104	17.4887	7.4098	1.23892	0.00895	0.0666842
ENSSSCT00000005851	ENSSSCG00000005313	CCDC107	chr1:264105679-264108701	14.2591	7.39821	0.946633	0.0009	0.0122346	14.9394	7.39821	1.01387	0.0005	0.00778241
ENSSSCT00000000642	ENSSSCG00000000597	LMO3	chr5:59455716-59508948	3.44423	7.38784	-1.10097	0.00045	0.00719494	3.2654	7.38784	-1.17789	0.0005	0.00778241
ENSSSCT00000036170	ENSSSCG00000023334	CXorf23	chrX:17516102-17565214	4.23366	7.38368	-0.802435	0.01835	0.111964	3.99791	7.38368	-0.885093	0.00695	0.0556722
ENSSSCT00000008772	ENSSSCG00000008004	FAM173A	chr3:41418620-41422752	14.025	7.36957	0.928352	5e-05	0.00119245	16.2994	7.36957	1.14517	5e-05	0.00119245
ENSSSCT00000000519	ENSSSCG00000000481	IFNG	chr5:35374322-35379577	4.33794	7.35783	-0.76227	0.018	0.110428	2.94986	7.35783	-1.31863	0.00285	0.029011
ENSSSCT00000022266	ENSSSCG00000015796	PDLIM3	chr15:53297821-53328139	12.9728	7.3548	0.818733	0.00055	0.00838524	9.83761	7.3548	0.419623	0.0811	0.302886
ENSSSCT00000000016	ENSSSCG00000000015	UPK3A	chr5:1324339-1373617	11.1742	7.35148	0.60407	0.0423	0.198072	10.8339	7.35148	0.559443	0.05605	0.238605
ENSSSCT00000035046	ENSSSCG00000003229	ETFB	chr6:51672741-51688479	21.4869	7.35103	1.54744	0.025	0.13832	20.6671	7.35103	1.49132	0.03	0.156985
ENSSSCT00000007546	ENSSSCG00000006891	GCLM	chr4:135017069-135032511	11.5634	7.33935	0.65584	0.006	0.0501269	12.2841	7.33935	0.743062	0.0023	0.0246104
ENSSSCT00000023613	ENSSSCG00000030088	CSF2RA	GL896316.1:20-12375	4.32548	7.33546	-0.762026	0.0042	0.038713	4.27608	7.33546	-0.7786	0.0041	0.0380764
ENSSSCT00000031537	ENSSSCG00000030676	KRTCAP3	chr3:118753133-118789281	18.7677	7.32716	1.35693	0.00235	0.0250032	19.7665	7.32716	1.43173	0.0014	0.0169856
ENSSSCT00000015355	ENSSSCG00000014056	RNF44	chr2:82986302-82992368	4.62844	7.32137	-0.661588	0.00445	0.0402804	4.6528	7.32137	-0.654016	0.0049	0.0433301
ENSSSCT00000018831	ENSSSCG00000017297	CYB561	chr12:15423260-15433726	12.4	7.31293	0.761824	0.00035	0.0058827	13.3505	7.31293	0.868375	5e-05	0.00119245
ENSSSCT00000035365	ENSSSCG00000007153	ATRN	chr17:36381689-36619079	3.39116	7.31123	-1.10834	0.01615	0.102134	3.88779	7.31123	-0.911163	0.0397	0.189956
ENSSSCT00000014905	ENSSSCG00000013645	ATG4D	chr2:69705971-69722769	12.7398	7.27357	0.80861	0.00825	0.0629718	14.7258	7.27357	1.0176	0.00095	0.0127118
ENSSSCT00000019070	ENSSSCG00000017516	SP2	chr12:24074445-24076719	3.11204	7.24589	-1.2193	0.0001	0.00214362	2.69039	7.24589	-1.42935	5e-05	0.00119245
ENSSSCT00000032347	ENSSSCG00000028481	CALCOCO1	chr5:19356304-19375156	11.2169	7.21956	0.635686	0.0054	0.0464359	9.60979	7.21956	0.412594	0.0709	0.277507
ENSSSCT00000019650	ENSSSCG00000018055	PEMT	chr12:63139390-63150665	12.3799	7.21205	0.77952	0.0005	0.00778241	11.3323	7.21205	0.65196	0.0052	0.0451959
ENSSSCT00000025519	ENSSSCG00000026360	CLGN	chr8:92109465-92167413	3.33778	7.20821	-1.11075	5e-05	0.00119245	2.82702	7.20821	-1.35036	5e-05	0.00119245
ENSSSCT00000031690	ENSSSCG00000014406	PRELID2	chr2:153598272-153619020	15.826	7.19481	1.13727	0.00055	0.00838524	15.0932	7.19481	1.06887	0.0015	0.0178968
ENSSSCT00000007067	ENSSSCG00000006452	CD1D	chr4:100437381-100460436	13.376	7.17578	0.898445	0.0003	0.00520502	11.0088	7.17578	0.617444	0.0139	0.0914288
ENSSSCT00000019349	ENSSSCG00000017777	FLOT2	chr12:47153568-47162508	10.9744	7.17463	0.613171	0.01595	0.101159	10.521	7.17463	0.552301	0.0302	0.15776
ENSSSCT00000025236	ENSSSCG00000030260	PFN2	chr13:98233242-98237612	12.922	7.17267	0.849253	0.01805	0.110639	9.82871	7.17267	0.454492	0.2029	0.525796
ENSSSCT00000035457	ENSSSCG00000028027	GPR65	chr7:116433282-116443636	2.92076	7.11316	-1.28414	5e-05	0.00119245	2.50836	7.11316	-1.50375	5e-05	0.00119245
ENSSSCT00000027425	ENSSSCG00000011743	MECOM	chr13:116467996-116654117	3.93771	7.1116	-0.852818	0.01125	0.0785609	4.09804	7.1116	-0.795239	0.0126	0.0852168
ENSSSCT00000027118	ENSSSCG00000026787	LSM1	chr15:55603946-55630485	11.688	7.10514	0.718089	0.0097	0.0708047	12.3213	7.10514	0.794214	0.0041	0.0380764
ENSSSCT00000015660	ENSSSCG00000014336	EGR1	chr2:146156064-146160020	4.57792	7.09996	-0.633116	0.0065	0.0530437	3.633	7.09996	-0.966649	0.0001	0.00214362
ENSSSCT00000011228	ENSSSCG00000010258	AIFM2	chr14:78974007-78994034	10.7596	7.09074	0.601612	0.00725	0.0572935	9.86881	7.09074	0.47694	0.0257	0.140817
ENSSSCT00000010093	ENSSSCG00000009217	PKD2	chr8:140235496-140289084	12.1589	7.08628	0.778911	0.0004	0.00655605	12.164	7.08628	0.779516	0.00035	0.0058827
ENSSSCT00000032266	ENSSSCG00000023933	CRACR2B	chr2:150255-155506	17.4559	7.07655	1.3026	5e-05	0.00119245	15.1796	7.07655	1.10102	5e-05	0.00119245
ENSSSCT00000018386	ENSSSCG00000016882	PARP8	chr16:31878943-32060032	4.6829	7.0763	-0.595592	0.00275	0.0281588	3.52092	7.0763	-1.00704	5e-05	0.00119245
ENSSSCT00000025735	ENSSSCG00000022164	HSF2BP	chr13:216653113-216696962	11.8343	7.07433	0.742312	0.0022	0.0238111	11.2649	7.07433	0.671164	0.0059	0.0494723
ENSSSCT00000003749	ENSSSCG00000003378	THAP3	chr6:62363771-62465718	15.2912	7.0684	1.11324	0.041	0.194058	18.7916	7.0684	1.41063	0.01125	0.0785609
ENSSSCT00000002106	ENSSSCG00000001881	MAN2C1	chr7:62936862-62949430	12.0329	7.05014	0.771266	0.00015	0.00297337	12.167	7.05014	0.787248	0.00015	0.00297337
ENSSSCT00000003331	ENSSSCG00000002999	C19orf54	chr6:44647441-44655648	4.35272	7.0422	-0.694107	0.00395	0.0370382	3.97162	7.0422	-0.826298	0.0006	0.00895758
ENSSSCT00000015445	ENSSSCG00000014141	RFESD	chr2:95686363-95696843	17.7584	7.01412	1.34017	5e-05	0.00119245	16.7338	7.01412	1.25443	0.00015	0.00297337
ENSSSCT00000005048	ENSSSCG00000004569	LACTB	chr1:120133371-120148220	10.9609	6.96483	0.654203	0.00355	0.034246	9.42906	6.96483	0.437026	0.05605	0.238605
ENSSSCT00000001560	ENSSSCG00000001420	EHMT2	chr7:27819354-27834344	3.81658	6.9602	-0.866848	0.034	0.171129	3.57989	6.9602	-0.959214	0.0228	0.129888
ENSSSCT00000036617	ENSSSCG00000015622	CD34	chr9:148445970-148470659	4.58362	6.95617	-0.601806	0.012	0.0822103	4.38751	6.95617	-0.664891	0.0069	0.0553826
ENSSSCT00000012812	ENSSSCG00000011702	TM4SF1	chr13:97596564-97603486	14.5007	6.95274	1.06047	5e-05	0.00119245	16.0464	6.95274	1.20659	5e-05	0.00119245
ENSSSCT00000012769	ENSSSCG00000011664	RBP1	chr13:88047831-88073811	16.3942	6.93827	1.24053	5e-05	0.00119245	17.7094	6.93827	1.35187	5e-05	0.00119245
ENSSSCT00000001568	ENSSSCG00000001426	STK19	chr7:27744801-27751975	13.7601	6.92179	0.991274	0.00015	0.00297337	15.7668	6.92179	1.18767	5e-05	0.00119245
ENSSSCT00000018253	ENSSSCG00000016768	MPLKIP	chr18:59574865-59578243	11.0068	6.91907	0.669745	0.002	0.0222139	10.6978	6.91907	0.628668	0.00355	0.034246
ENSSSCT00000018922	ENSSSCG00000017383	AOC3	chr12:20231726-20236169	14.1169	6.89972	1.03281	5e-05	0.00119245	14.5751	6.89972	1.0789	5e-05	0.00119245
ENSSSCT00000025872	ENSSSCG00000026087	GKAP1	chr10:35240971-35317629	11.0783	6.895	0.684112	0.00535	0.0461548	10.6171	6.895	0.622772	0.01045	0.0745279
ENSSSCT00000024745	ENSSSCG00000027701	RP2	chrX:46325398-46371634	4.52197	6.89295	-0.608168	0.0064	0.0524551	3.85288	6.89295	-0.839184	5e-05	0.00119245
ENSSSCT00000018439	ENSSSCG00000016932	DEPDC1B	chr16:42378459-42469251	3.76444	6.88376	-0.870761	0.0005	0.00778241	4.34405	6.88376	-0.664157	0.00445	0.0402804
ENSSSCT00000024296	ENSSSCG00000028571	FAM207A	chr13:217492705-217520322	18.6525	6.87507	1.43992	5e-05	0.00119245	22.0774	6.87507	1.68312	5e-05	0.00119245
ENSSSCT00000005753	ENSSSCG00000005220	PLPP6	chr1:243189688-243190591	12.7707	6.87059	0.894329	0.0012	0.0151808	13.2581	6.87059	0.948367	0.0005	0.00778241
ENSSSCT00000013183	ENSSSCG00000012051	RUNX1	chr13:208204967-208304419	4.119	6.85825	-0.735546	0.0036	0.0345772	3.61193	6.85825	-0.925071	0.0003	0.00520502
ENSSSCT00000007301	ENSSSCG00000006664	MTMR11	chr4:108596807-108604443	12.4441	6.85736	0.859737	0.0001	0.00214362	12.5843	6.85736	0.875898	0.0001	0.00214362
ENSSSCT00000030693	ENSSSCG00000025107	CCDC58	chr13:147763385-147782335	11.0252	6.84418	0.68786	0.02635	0.143482	12.8972	6.84418	0.914114	0.0038	0.035985
ENSSSCT00000011126	ENSSSCG00000010161	COA6	chr14:60803272-60811091	17.0236	6.84117	1.31522	5e-05	0.00119245	20.0628	6.84117	1.5522	5e-05	0.00119245
ENSSSCT00000032083	ENSSSCG00000024666	FXYD3	chr6:40111306-40118025	2.34837	6.84073	-1.54249	0.0001	0.00214362	3.29452	6.84073	-1.05408	0.0022	0.0238111
ENSSSCT00000000591	ENSSSCG00000000548	REP15	chr5:49597731-49598439	12.0427	6.82554	0.819139	0.00555	0.0473756	14.7453	6.82554	1.11124	0.00025	0.00449095
ENSSSCT00000018238	ENSSSCG00000016756	BLVRA	chr18:56025223-56079185	13.1393	6.82131	0.945771	0.0005	0.00778241	11.4656	6.82131	0.749185	0.00305	0.0305033
ENSSSCT00000033720	ENSSSCG00000012699	FHL1	chrX:127232156-127289862	13.8483	6.81266	1.02342	0.04775	0.214608	11.7019	6.81266	0.780456	0.12855	0.403846
ENSSSCT00000014072	ENSSSCG00000012874	ORAOV1	chr2:2095042-2103105	14.0564	6.80422	1.04673	5e-05	0.00119245	16.1473	6.80422	1.24679	5e-05	0.00119245
ENSSSCT00000005401	ENSSSCG00000004895	BCL2	chr1:175695536-175696139	10.6366	6.80215	0.644978	0.0337	0.17002	10.7416	6.80215	0.65915	0.03065	0.159266
ENSSSCT00000004294	ENSSSCG00000003882	SLC5A9	chr6:151000566-151014501	10.5006	6.75997	0.63538	0.00815	0.0623946	13.7991	6.75997	1.02949	5e-05	0.00119245
ENSSSCT00000003853	ENSSSCG00000003467	SLC25A34	chr6:69390943-69394891	21.0253	6.73715	1.64192	5e-05	0.00119245	30.1984	6.73715	2.16426	5e-05	0.00119245
ENSSSCT00000011400	ENSSSCG00000010416	ZNF32	chr14:100716654-100717407	12.7882	6.72381	0.927467	0.0015	0.0178968	12.3725	6.72381	0.879783	0.00275	0.0281588
ENSSSCT00000000230	ENSSSCG00000000215	SMARCD1	chr5:16338620-16354632	10.1276	6.72185	0.591369	0.0091	0.067605	10.1684	6.72185	0.59717	0.00865	0.0651238
ENSSSCT00000023792	ENSSSCG00000025739	TCAIM	chr13:30479441-30493165	4.26957	6.7194	-0.654244	0.007	0.0559327	4.10256	6.7194	-0.711807	0.00455	0.0409193
ENSSSCT00000008742	ENSSSCG00000007979	LUC7L	chr3:40960514-40991077	11.5086	6.71898	0.776396	0.00035	0.0058827	14.031	6.71898	1.0623	5e-05	0.00119245
ENSSSCT00000000912	ENSSSCG00000000839	ALDH1L2	chr5:82894881-82958376	2.36928	6.70726	-1.50128	0.0085	0.0643504	2.81397	6.70726	-1.25312	0.00245	0.025797
ENSSSCT00000014337	ENSSSCG00000013117	GIF	chr2:11108688-11126311	3.94406	6.69369	-0.763122	0.00925	0.0684333	5.35781	6.69369	-0.321159	0.2627	0.602768
ENSSSCT00000018260	ENSSSCG00000016773	ZNF282	chr18:60758337-60782100	10.252	6.67704	0.618625	0.0061	0.0507239	10.8914	6.67704	0.705908	0.0022	0.0238111
ENSSSCT00000003962	ENSSSCG00000003568	FAM46B	chr6:77873688-77881717	11.3681	6.662	0.770964	0.001	0.013215	17.5955	6.662	1.40118	5e-05	0.00119245
ENSSSCT00000024743	ENSSSCG00000027986	ABCB8	chr18:6548564-6567036	11.2198	6.64361	0.756005	0.00025	0.00449095	12.0246	6.64361	0.855947	5e-05	0.00119245
ENSSSCT00000032254	ENSSSCG00000008406	CCDC88A	chr3:90623417-90726404	4.14662	6.60242	-0.67106	0.04325	0.200947	3.36459	6.60242	-0.972562	0.0037	0.0352729
ENSSSCT00000035948	ENSSSCG00000000087	TAB1	chr5:6122717-6146864	16.5275	6.57216	1.33043	0.0002	0.003754	16.4673	6.57216	1.32516	0.0002	0.003754
ENSSSCT00000012651	ENSSSCG00000011560	CRELD1	chr13:73271289-73278801	11.4506	6.57047	0.801359	0.0013	0.0160896	15.5201	6.57047	1.24007	5e-05	0.00119245
ENSSSCT00000023990	ENSSSCG00000023354	ACAD9	chr13:79004138-79019577	12.9038	6.53823	0.980819	5e-05	0.00119245	13.0288	6.53823	0.994732	5e-05	0.00119245
ENSSSCT00000002943	ENSSSCG00000002652	KLHDC4	chr6:1750797-1760656	11.8996	6.52168	0.867598	0.0007	0.010104	12.852	6.52168	0.978679	0.00015	0.00297337
ENSSSCT00000018878	ENSSSCG00000017342	KIF18B	chr12:18681056-18692401	4.32526	6.50935	-0.589726	0.01605	0.101652	4.81587	6.50935	-0.434717	0.06035	0.249975
ENSSSCT00000032063	ENSSSCG00000026947	GMPR2	chr7:80327660-80341339	10.4277	6.48402	0.685455	0.0077	0.0597357	11.6703	6.48402	0.847884	0.00095	0.0127118
ENSSSCT00000000296	ENSSSCG00000000276	TARBP2	chr5:19154194-19159492	12.9657	6.48106	1.0004	5e-05	0.00119245	15.2058	6.48106	1.23032	5e-05	0.00119245
ENSSSCT00000007949	ENSSSCG00000007264	CDK5RAP1	chr17:41827903-41861498	9.98028	6.47722	0.623706	0.00515	0.0448588	11.2456	6.47722	0.795914	0.0002	0.003754
ENSSSCT00000026848	ENSSSCG00000024936	C1QTNF5	chr9:51582415-51584218	10.8551	6.47156	0.746187	0.0043	0.0393907	11.4163	6.47156	0.818915	0.0015	0.0178968
ENSSSCT00000023424	ENSSSCG00000022417	HNF1B	chr12:40788315-40846408	3.46579	6.46273	-0.89896	0.00105	0.0137227	3.82378	6.46273	-0.757147	0.0043	0.0393907
ENSSSCT00000023504	ENSSSCG00000027733	RRP7A	GL896147.1:20-4840	10.2925	6.4589	0.672237	0.0057	0.0482378	11.2556	6.4589	0.801279	0.0008	0.0111573
ENSSSCT00000005967	ENSSSCG00000005424	NIPSNAP3B	chr1:275511766-275522618	9.86185	6.43143	0.616718	0.01235	0.0838539	7.75975	6.43143	0.27087	0.2722	0.613284
ENSSSCT00000023251	ENSSSCG00000022086	RBMX2	GL894065.1:52420-59637	3.9835	6.41381	-0.687145	0.02015	0.119218	3.8681	6.41381	-0.729558	0.02005	0.118791
ENSSSCT00000000681	ENSSSCG00000000634	STYK1	chr5:64121145-64143261	13.7219	6.4066	1.09885	5e-05	0.00119245	23.8144	6.4066	1.8942	5e-05	0.00119245
ENSSSCT00000006195	ENSSSCG00000022655	PTGES2	chr1:302576513-302581314	11.4055	6.40333	0.832834	0.00165	0.0192591	15.7341	6.40333	1.297	5e-05	0.00119245
ENSSSCT00000002126	ENSSSCG00000001898	ULK3	chr7:63389287-63395802	10.1896	6.40008	0.67093	0.00195	0.0218749	11.1363	6.40008	0.799101	0.00035	0.0058827
ENSSSCT00000001676	ENSSSCG00000001503	B3GALT4	chr7:34146954-34148615	12.1082	6.39496	0.92098	0.00015	0.00297337	14.2117	6.39496	1.15207	5e-05	0.00119245
ENSSSCT00000026093	ENSSSCG00000015035	C11orf52	chr9:44438432-44445766	10.0789	6.38878	0.65772	0.011	0.0773554	9.46255	6.38878	0.566688	0.032	0.164174
ENSSSCT00000003955	ENSSSCG00000003561	ZDHHC18	chr6:77724042-77750762	3.89851	6.38259	-0.711219	0.0094	0.069199	3.69617	6.38259	-0.788108	0.00605	0.0504261
ENSSSCT00000018375	ENSSSCG00000016871	CCL28	chr16:29377428-29399147	3.95517	6.35544	-0.684252	0.0293	0.154599	4.20105	6.35544	-0.597244	0.0598	0.248388
ENSSSCT00000022729	ENSSSCG00000023866	ACSF3	chr6:825970-843709	10.4428	6.33225	0.721711	0.0031	0.0308875	11.1647	6.33225	0.818148	0.00095	0.0127118
ENSSSCT00000000007	ENSSSCG00000000006	PPARA	chr5:424928-488440	11.3753	6.31501	0.84905	5e-05	0.00119245	14.3169	6.31501	1.18086	5e-05	0.00119245
ENSSSCT00000008131	ENSSSCG00000007428	ZSWIM1	chr17:53721608-53723442	4.04863	6.30741	-0.639614	0.01675	0.104902	3.92664	6.30741	-0.683753	0.0107	0.0757871
ENSSSCT00000015008	ENSSSCG00000013734	HOOK2	chr2:66481417-66493419	13.5031	6.29566	1.10086	5e-05	0.00119245	13.1736	6.29566	1.06522	5e-05	0.00119245
ENSSSCT00000011298	ENSSSCG00000010321	COMTD1	JH118641.1:25838-27820	12.3087	6.25435	0.97675	0.0036	0.0345772	14.7836	6.25435	1.24106	5e-05	0.00119245
ENSSSCT00000002392	ENSSSCG00000002138	OSGEP	chr7:83482371-83490089	11.6197	6.25011	0.894619	0.0001	0.00214362	15.5962	6.25011	1.31924	5e-05	0.00119245
ENSSSCT00000027748	ENSSSCG00000023619	SLC12A9	chr3:8129943-8139441	11.1395	6.22408	0.839756	5e-05	0.00119245	11.3812	6.22408	0.87072	5e-05	0.00119245
ENSSSCT00000029985	ENSSSCG00000026427	RORC	chr4:106398576-106422061	9.58596	6.22217	0.623507	0.0061	0.0507239	8.93536	6.22217	0.522109	0.02025	0.119654
ENSSSCT00000011816	ENSSSCG00000010800	B3GALT2	chr10:2306957-2308226	13.8392	6.21931	1.15393	0.00015	0.00297337	10.7432	6.21931	0.788604	0.00775	0.0600435
ENSSSCT00000006526	ENSSSCG00000005943	ST3GAL1	chr4:7685581-7776990	20.8303	6.21615	1.74459	5e-05	0.00119245	7.9031	6.21615	0.346398	0.10255	0.351015
ENSSSCT00000015279	ENSSSCG00000013988	IBA57	chr2:53824454-53835832	9.63486	6.21043	0.63357	0.00545	0.0467215	10.4535	6.21043	0.751224	0.0009	0.0122346
ENSSSCT00000013554	ENSSSCG00000012396	MED12	chrX:64681018-64704523	2.87167	6.19966	-1.1103	0.01415	0.0926446	2.80725	6.19966	-1.14303	0.0162	0.102359
ENSSSCT00000004968	ENSSSCG00000004497	PSTPIP2	chr1:105810351-105870759	3.92592	6.1977	-0.658701	0.00925	0.0684333	4.02726	6.1977	-0.621936	0.0121	0.0826211
ENSSSCT00000035592	ENSSSCG00000012825	IKBKG	chrX:143478836-143494122	13.0762	6.17629	1.08213	0.00465	0.0415674	13.1377	6.17629	1.0889	0.00445	0.0402804
ENSSSCT00000014214	ENSSSCG00000013003	ZNHIT2	chr2:6207435-6208686	9.83744	6.17384	0.672116	0.0109	0.0768126	12.645	6.17384	1.03432	0.00025	0.00449095
ENSSSCT00000017511	ENSSSCG00000016083	PLCL1	chr15:112940717-113017866	3.45972	6.17033	-0.834694	0.00035	0.0058827	3.09998	6.17033	-0.99309	5e-05	0.00119245
ENSSSCT00000008177	ENSSSCG00000007472	BCAS4	chr17:58679437-58744300	9.60055	6.16456	0.639119	0.01895	0.114327	9.33792	6.16456	0.599104	0.03245	0.165713
ENSSSCT00000022300	ENSSSCG00000026097	LAMP3	chr13:130594771-130621312	3.21772	6.14734	-0.933922	0.00025	0.00449095	2.5228	6.14734	-1.28494	5e-05	0.00119245
ENSSSCT00000028225	ENSSSCG00000026004	MSRB3	chr5:33031836-33088198	11.3679	6.13144	0.890665	0.00015	0.00297337	8.92097	6.13144	0.540975	0.0191	0.114864
ENSSSCT00000028972	ENSSSCG00000030165	MAFF	chr5:6966173-6978549	9.38992	6.10427	0.621295	0.00735	0.0578338	12.4648	6.10427	1.02997	5e-05	0.00119245
ENSSSCT00000029544	ENSSSCG00000026530	GPR19	GL896456.1:8247-9627	3.39058	6.07311	-0.840904	0.004	0.0373974	3.4951	6.07311	-0.797102	0.0066	0.0536545
ENSSSCT00000012903	ENSSSCG00000011791	MAP3K13	chr13:132842027-132901651	3.88342	6.05921	-0.641803	0.0203	0.119894	4.13007	6.05921	-0.552965	0.04535	0.207376
ENSSSCT00000008803	ENSSSCG00000008034	NOXO1	chr3:42192095-42194137	9.91085	6.04652	0.712902	0.0069	0.0553826	8.19497	6.04652	0.438632	0.08965	0.322598
ENSSSCT00000014641	ENSSSCG00000013401	DKK3	chr2:50699984-50758475	10.8001	6.04629	0.836926	0.0004	0.00655605	8.9337	6.04629	0.563209	0.0119	0.0818143
ENSSSCT00000019506	ENSSSCG00000017923	ALOX15	chr12:54500604-54510831	2.93451	5.99498	-1.03064	0.00015	0.00297337	2.98719	5.99498	-1.00497	0.0003	0.00520502
ENSSSCT00000030985	ENSSSCG00000025943	C6orf136	chr7:26907613-26912221	3.98671	5.98771	-0.586807	0.03995	0.190796	3.81802	5.98771	-0.649179	0.02395	0.134417
ENSSSCT00000017233	ENSSSCG00000015825	ADGRA2	chr15:55684465-55727538	9.61044	5.97971	0.684526	0.00095	0.0127118	9.39477	5.97971	0.651782	0.00205	0.02262
ENSSSCT00000006273	ENSSSCG00000005704	EXOSC2	chr1:304671175-304679921	10.9734	5.97957	0.875894	0.0013	0.0160896	12.7503	5.97957	1.09242	0.0001	0.00214362
ENSSSCT00000012520	ENSSSCG00000011440	SEMA3G	chr13:37790285-37799336	9.37603	5.97668	0.649634	0.00375	0.0356116	10.0739	5.97668	0.753207	0.00085	0.0116991
ENSSSCT00000026626	ENSSSCG00000030301	MRPL36	chr16:85605579-85608350	8.96959	5.97269	0.58666	0.01065	0.0755668	10.6891	5.97269	0.839692	0.0001	0.00214362
ENSSSCT00000025534	ENSSSCG00000024242	MRPL54	chr2:75517894-75519678	12.6429	5.87506	1.10565	0.00195	0.0218749	14.2179	5.87506	1.27503	0.0005	0.00778241
ENSSSCT00000008643	ENSSSCG00000007888	TNFRSF17	chr3:32122319-32134608	12.0493	5.86321	1.03918	0.0462	0.209898	10.8635	5.86321	0.889732	0.0741	0.285234
ENSSSCT00000036460	ENSSSCG00000012727	FMR1	chrX:137792660-137831725	1.39255	5.85312	-2.07148	0.0485	0.216867	2.40359	5.85312	-1.28402	0.0233	0.131949
ENSSSCT00000004293	ENSSSCG00000003881	SPATA6	chr6:150809985-150895237	2.29027	5.8159	-1.34449	5e-05	0.00119245	2.20413	5.8159	-1.39979	5e-05	0.00119245
ENSSSCT00000000120	ENSSSCG00000000114	PICK1	chr5:7208087-7224935	8.99191	5.78363	0.636652	0.00375	0.0356116	9.91353	5.78363	0.777423	0.0005	0.00778241
ENSSSCT00000006186	ENSSSCG00000005626	FPGS	chr1:302224596-302231230	2.92832	5.77865	-0.980661	0.0005	0.00778241	3.21955	5.77865	-0.843874	0.00155	0.0183734
ENSSSCT00000031431	ENSSSCG00000022975	AMT	JH118489.1:28423-34573	12.0828	5.75339	1.07047	5e-05	0.00119245	12.1578	5.75339	1.0794	5e-05	0.00119245
ENSSSCT00000030610	ENSSSCG00000028788	BORCS6	chr12:55880278-55881343	11.1638	5.74518	0.958402	0.0005	0.00778241	9.63767	5.74518	0.746332	0.00555	0.0473756
ENSSSCT00000006480	ENSSSCG00000005901	PPP1R16A	chr4:393620-398316	10.5761	5.73963	0.881778	0.00015	0.00297337	12.3063	5.73963	1.10037	5e-05	0.00119245
ENSSSCT00000009596	ENSSSCG00000008771	C4orf19	chr8:30512256-30515528	9.80848	5.73537	0.774143	0.00385	0.0363563	10.9869	5.73537	0.937827	0.0005	0.00778241
ENSSSCT00000012823	ENSSSCG00000011713	P2RY12	chr13:99605565-99606582	2.59762	5.73517	-1.14265	0.0008	0.0111573	2.05642	5.73517	-1.4797	0.00015	0.00297337
ENSSSCT00000028632	ENSSSCG00000030582	BATF	chr7:104503136-104524774	8.7865	5.72187	0.618803	0.0281	0.150262	8.59079	5.72187	0.586305	0.0387	0.186651
ENSSSCT00000026467	ENSSSCG00000021893	ROCK1	chr6:98713996-98861692	13.5267	5.71132	1.24392	0.03365	0.169861	15.4979	5.71132	1.44018	0.0163	0.102859
ENSSSCT00000002844	ENSSSCG00000002559	CDCA4	chr7:131262823-131263462	16.0472	5.70641	1.49166	5e-05	0.00119245	19.9942	5.70641	1.80893	5e-05	0.00119245
ENSSSCT00000031859	ENSSSCG00000025499	FXYD5	chr6:40131849-40145607	8.74153	5.68466	0.620813	0.0256	0.14051	8.29885	5.68466	0.545837	0.04995	0.221401
ENSSSCT00000018117	ENSSSCG00000016639	FOXP2	chr18:33665883-33729399	3.24397	5.68323	-0.808951	0.0021	0.0230209	3.32691	5.68323	-0.77253	0.0036	0.0345772
ENSSSCT00000035578	ENSSSCG00000003410	CH242-449E16.1	chr6:65144360-65150734	3.2196	5.67223	-0.817035	0.0024	0.0254043	3.28302	5.67223	-0.788893	0.00375	0.0356116
ENSSSCT00000031428	ENSSSCG00000024018	SLC16A3	chr12:963451-967637	11.4689	5.64627	1.02236	5e-05	0.00119245	14.9642	5.64627	1.40614	5e-05	0.00119245
ENSSSCT00000011533	ENSSSCG00000010542	CUTC	chr14:120326811-120366812	10.2134	5.63712	0.857431	0.02435	0.136089	9.98849	5.63712	0.825309	0.0349	0.173948
ENSSSCT00000025244	ENSSSCG00000021890	GNB2	chr3:7974102-7979030	8.57087	5.62907	0.606546	0.0187	0.113353	7.94068	5.62907	0.496366	0.0582	0.244024
ENSSSCT00000011568	ENSSSCG00000010575	PPRC1	chr14:122989821-123005689	3.04027	5.61292	-0.884554	0.0055	0.0470618	3.15755	5.61292	-0.829945	0.01025	0.0734947
ENSSSCT00000003237	ENSSSCG00000002930	ZNF260	chr6:41318229-41319459	9.8923	5.60703	0.819069	0.0016	0.018837	8.57039	5.60703	0.612124	0.0153	0.0982045
ENSSSCT00000026537	ENSSSCG00000027956	SSH3	chr2:3968533-3976217	8.79473	5.59847	0.651609	0.0026	0.0269681	9.75688	5.59847	0.801388	0.0004	0.00655605
ENSSSCT00000030554	ENSSSCG00000029772	SOCS3	GL896293.1:10039-10729	2.77591	5.57313	-1.00553	0.0249	0.138006	3.49273	5.57313	-0.674133	0.1101	0.366887
ENSSSCT00000035889	ENSSSCG00000001362	MDC1	chr7:26951455-26968403	3.61175	5.54621	-0.618804	0.01805	0.110639	4.17034	5.54621	-0.411338	0.09755	0.340178
ENSSSCT00000018408	ENSSSCG00000016902	GZMA	chr16:36365988-36376137	11.3676	5.52843	1.03999	5e-05	0.00119245	12.2859	5.52843	1.15206	0.0003	0.00520502
ENSSSCT00000012435	ENSSSCG00000011358	TREX1	chr13:34561815-34563334	9.76773	5.50956	0.826086	0.0012	0.0151808	9.66728	5.50956	0.811173	0.00115	0.01472
ENSSSCT00000011566	ENSSSCG00000010573	HPS6	chr14:122933890-122936445	8.65837	5.49518	0.65593	0.0037	0.0352729	9.03721	5.49518	0.717711	0.0017	0.0196705
ENSSSCT00000007407	ENSSSCG00000006761	DCLRE1B	chr4:116854618-116862006	3.16259	5.4808	-0.793278	0.0011	0.0142222	3.38843	5.4808	-0.693771	0.00575	0.0485518
ENSSSCT00000003384	ENSSSCG00000003047	CH242-183C8.3	chr6:45969646-45974109	1.70922	5.4769	-1.68003	0.0002	0.003754	3.50282	5.4769	-0.644845	0.07185	0.279787
ENSSSCT00000009839	ENSSSCG00000008982	STBD1	chr8:76177907-76182538	9.95006	5.46273	0.865084	0.0003	0.00520502	10.0695	5.46273	0.882297	0.0002	0.003754
ENSSSCT00000018168	ENSSSCG00000016687	CHN2	chr18:47596366-47715301	3.52906	5.45737	-0.62892	0.02845	0.151513	2.34602	5.45737	-1.21799	0.00015	0.00297337
ENSSSCT00000003630	ENSSSCG00000003269	LENG9	chr6:53410383-53411934	8.37034	5.41608	0.628038	0.01245	0.0843986	10.2891	5.41608	0.92579	0.0003	0.00520502
ENSSSCT00000036390	ENSSSCG00000015896	FAP	chr15:76322711-76394187	3.56682	5.41013	-0.601026	0.01185	0.0815406	3.02328	5.41013	-0.839546	0.00045	0.00719494
ENSSSCT00000018315	ENSSSCG00000016822	AMACR	chr16:20765283-20782822	8.35471	5.40985	0.627002	0.01375	0.0908062	12.3133	5.40985	1.18656	5e-05	0.00119245
ENSSSCT00000005088	ENSSSCG00000004607	PYGO1	chr1:128780599-128806568	2.47424	5.37502	-1.11928	0.0001	0.00214362	1.89629	5.37502	-1.50309	5e-05	0.00119245
ENSSSCT00000002842	ENSSSCG00000002557	NUDT14	chr7:131249481-131253801	12.2944	5.37373	1.194	0.0003	0.00520502	13.3298	5.37373	1.31066	0.0001	0.00214362
ENSSSCT00000016913	ENSSSCG00000015525	TOR3A	chr9:132634648-132660669	10.2829	5.36615	0.938289	5e-05	0.00119245	11.1273	5.36615	1.05215	5e-05	0.00119245
ENSSSCT00000026905	ENSSSCG00000026585	PROCR	chr17:43729703-43734474	9.12719	5.36355	0.766982	0.0023	0.0246104	10.0703	5.36355	0.908847	0.00025	0.00449095
ENSSSCT00000005635	ENSSSCG00000005112	WDR89	chr1:216446466-216447627	12.571	5.35423	1.23135	5e-05	0.00119245	13.5566	5.35423	1.34025	5e-05	0.00119245
ENSSSCT00000007157	ENSSSCG00000006535	PMVK	chr4:103634252-103646149	17.7763	5.34303	1.73422	5e-05	0.00119245	19.3113	5.34303	1.85372	5e-05	0.00119245
ENSSSCT00000006485	ENSSSCG00000005905	SLC39A4	chr4:464086-469224	9.59414	5.32934	0.848198	0.00865	0.0651238	11.5231	5.32934	1.1125	0.002	0.0222139
ENSSSCT00000007087	ENSSSCG00000006470	RRNAD1	chr4:101929780-101937664	8.59394	5.32615	0.690228	0.00375	0.0356116	10.14	5.32615	0.928894	0.0002	0.003754
ENSSSCT00000019456	ENSSSCG00000017879	SPNS2	chr12:52453740-52487384	9.90252	5.30363	0.900815	0.0002	0.003754	11.6109	5.30363	1.13043	5e-05	0.00119245
ENSSSCT00000008810	ENSSSCG00000008039	NTHL1	chr3:42239828-42245889	9.99017	5.28373	0.918953	0.00085	0.0116991	10.5531	5.28373	0.998041	0.00035	0.0058827
ENSSSCT00000025040	ENSSSCG00000024179	NAGS	chr12:19402213-19411777	11.6859	5.26848	1.14931	5e-05	0.00119245	13.9185	5.26848	1.40154	5e-05	0.00119245
ENSSSCT00000015107	ENSSSCG00000013829	SYDE1	chr2:61996374-62014992	9.01334	5.25511	0.77834	0.0279	0.149492	9.55946	5.25511	0.863208	0.01595	0.101159
ENSSSCT00000031122	ENSSSCG00000020915	P4HA2	chr2:139853768-139885838	9.84468	5.22767	0.913177	0.01115	0.0780671	15.2813	5.22767	1.54753	5e-05	0.00119245
ENSSSCT00000028037	ENSSSCG00000021698	RRP1B	chr13:216628847-216647523	8.22878	5.21743	0.65734	0.0012	0.0151808	8.68312	5.21743	0.734876	0.00025	0.00449095
ENSSSCT00000003102	ENSSSCG00000002802	GINS3	chr6:18222537-18230107	8.69353	5.19303	0.743365	0.0018	0.0205452	9.54132	5.19303	0.877612	0.0002	0.003754
ENSSSCT00000013217	ENSSSCG00000012083	RIPK4	chr13:215452666-215478472	8.94487	5.14082	0.79906	0.00035	0.0058827	8.81842	5.14082	0.77852	0.0005	0.00778241
ENSSSCT00000012222	ENSSSCG00000011160	ADARB2	chr10:75201375-75302603	8.19172	5.13803	0.672951	0.0022	0.0238111	6.89021	5.13803	0.423331	0.0517	0.226367
ENSSSCT00000033327	ENSSSCG00000012126	GPM6B	chrX:11383150-11536112	8.12359	5.12904	0.66343	0.0482	0.215903	8.43577	5.12904	0.717833	0.0376	0.183098
ENSSSCT00000026878	ENSSSCG00000025796	NLE1	chr12:41546590-41555533	8.85972	5.12463	0.789812	0.00135	0.0165389	11.2728	5.12463	1.13733	5e-05	0.00119245
ENSSSCT00000026451	ENSSSCG00000022797	PPP1R3B	chr15:63426229-63437375	9.78656	5.12224	0.934029	5e-05	0.00119245	10.3516	5.12224	1.015	5e-05	0.00119245
ENSSSCT00000012178	ENSSSCG00000011127	TAF3	chr10:69631728-69671374	2.45224	5.09203	-1.05414	5e-05	0.00119245	2.5519	5.09203	-0.996669	5e-05	0.00119245
ENSSSCT00000006243	ENSSSCG00000005678	NTMT1	chr1:303687310-303696507	7.79531	5.0765	0.618774	0.0112	0.0783229	9.91144	5.0765	0.965262	5e-05	0.00119245
ENSSSCT00000029285	ENSSSCG00000020674	DEPDC7	chr2:30336198-30344645	13.9131	5.07137	1.456	5e-05	0.00119245	21.0342	5.07137	2.05229	5e-05	0.00119245
ENSSSCT00000034230	ENSSSCG00000004291	NT5E	chr1:60831749-60879526	7.87692	5.06446	0.637222	0.0081	0.062101	7.06074	5.06446	0.479409	0.0512	0.224839
ENSSSCT00000002610	ENSSSCG00000002346	PNMA1	chr7:102682181-102683240	8.71813	5.02635	0.794508	0.0036	0.0345772	7.75886	5.02635	0.626334	0.0268	0.14513
ENSSSCT00000005624	ENSSSCG00000005102	AEN	chr1:212633408-212644737	10.0522	5.02458	1.00044	5e-05	0.00119245	11.9882	5.02458	1.25454	5e-05	0.00119245
ENSSSCT00000008450	ENSSSCG00000007707	VPS37D	chr3:10645944-10649074	7.71288	5.0149	0.621048	0.0402	0.191404	6.01621	5.0149	0.262633	0.40135	0.740775
ENSSSCT00000031597	ENSSSCG00000024628	ALKBH8	chr9:40124449-40167601	7.54235	4.99592	0.594263	0.00885	0.0661084	6.76498	4.99592	0.437334	0.05565	0.237392
ENSSSCT00000002693	ENSSSCG00000002424	SPATA7	chr7:116807845-116862444	3.10382	4.98615	-0.683882	0.0086	0.0649308	2.21876	4.98615	-1.16817	5e-05	0.00119245
ENSSSCT00000022444	ENSSSCG00000024987	NR3C2	chr8:85602110-85645631	2.81626	4.98541	-0.823933	0.02685	0.145302	3.00959	4.98541	-0.728147	0.06375	0.259225
ENSSSCT00000010538	ENSSSCG00000009615	NUDT18	chr14:6814606-6817340	7.74386	4.93898	0.64884	0.00935	0.0689499	8.01928	4.93898	0.699261	0.00485	0.0429592
ENSSSCT00000003407	ENSSSCG00000003070	ZNF45	chr6:46622440-46627724	7.50684	4.92427	0.608294	0.0098	0.0713231	7.54494	4.92427	0.615599	0.0089	0.0663967
ENSSSCT00000019580	ENSSSCG00000017992	MFSD6L	chr12:56657166-56658939	8.58464	4.91107	0.805719	0.0009	0.0122346	10.9106	4.91107	1.15162	5e-05	0.00119245
ENSSSCT00000010983	ENSSSCG00000010026	PIK3IP1	chr14:51151821-51162385	9.9986	4.90035	1.02884	5e-05	0.00119245	11.5575	4.90035	1.23787	5e-05	0.00119245
ENSSSCT00000032497	ENSSSCG00000024221	SMUG1	chr5:20042387-20050218	7.96483	4.87176	0.709199	0.0019	0.0214646	7.87095	4.87176	0.692093	0.0021	0.0230209
ENSSSCT00000017797	ENSSSCG00000016342	HES6	chr15:152217834-152219640	9.94162	4.86876	1.02993	5e-05	0.00119245	9.89798	4.86876	1.02358	5e-05	0.00119245
ENSSSCT00000022755	ENSSSCG00000029228	ZNF276	chr6:425908-438903	9.31831	4.86813	0.936701	0.0003	0.00520502	11.0762	4.86813	1.18602	5e-05	0.00119245
ENSSSCT00000003136	ENSSSCG00000002835	TOX3	chr6:29306597-29418995	1.98711	4.86543	-1.29189	5e-05	0.00119245	2.51979	4.86543	-0.949262	0.001	0.013215
ENSSSCT00000029467	ENSSSCG00000029275	PPARGC1A	GL896199.1:15044-57267	2.64059	4.86108	-0.880416	0.00045	0.00719494	3.40758	4.86108	-0.512531	0.0386	0.186365
ENSSSCT00000023979	ENSSSCG00000027865	GALC	chr7:116348930-116415759	7.86494	4.84883	0.697799	0.0019	0.0214646	9.75548	4.84883	1.00858	5e-05	0.00119245
ENSSSCT00000006577	ENSSSCG00000005994	SNTB1	chr4:19423080-19550493	3.10718	4.84718	-0.641539	0.0058	0.0488708	2.79727	4.84718	-0.793123	0.0008	0.0111573
ENSSSCT00000004754	ENSSSCG00000004300	SMIM8	chr1:62447068-62456156	10.6236	4.84338	1.13318	0.0002	0.003754	10.1663	4.84338	1.0697	0.0005	0.00778241
ENSSSCT00000014330	ENSSSCG00000013110	TMEM109	chr2:10372949-10382184	8.56698	4.83741	0.824552	0.001	0.013215	9.51782	4.83741	0.976396	0.0001	0.00214362
ENSSSCT00000006232	ENSSSCG00000005669	MIGA2	chr1:303351065-303380151	7.73703	4.83309	0.678836	0.0013	0.0160896	8.0138	4.83309	0.729543	0.00035	0.0058827
ENSSSCT00000005532	ENSSSCG00000005016	L2HGDH	chr1:200362035-200410366	9.74538	4.82812	1.01326	5e-05	0.00119245	9.23924	4.82812	0.936312	0.0001	0.00214362
ENSSSCT00000026762	ENSSSCG00000030131	C15orf40	chr7:57417818-57425005	8.02351	4.82811	0.732776	0.0008	0.0111573	8.49685	4.82811	0.815469	0.0001	0.00214362
ENSSSCT00000004631	ENSSSCG00000004192	CTGF	chr1:35133812-35137139	7.69576	4.80823	0.678559	0.00685	0.0551543	4.83646	4.80823	0.00844671	0.972	0.992557
ENSSSCT00000035742	ENSSSCG00000012291	GPKOW	chrX:48024600-48039718	9.95681	4.75492	1.06626	0.00125	0.015631	10.7304	4.75492	1.17421	0.00065	0.00953497
ENSSSCT00000006198	ENSSSCG00000005636	SLC25A25	chr1:302453221-302567491	7.98855	4.74778	0.750679	0.0006	0.00895758	10.2551	4.74778	1.11102	5e-05	0.00119245
ENSSSCT00000004182	ENSSSCG00000003779	TYW3	chr6:128286278-128301919	7.78621	4.74486	0.714555	0.0149	0.0962356	9.26368	4.74486	0.965219	0.00105	0.0137227
ENSSSCT00000031288	ENSSSCG00000029434	SLC10A5	GL893852.2:48964-50272	9.54683	4.72905	1.01347	0.0002	0.003754	6.66291	4.72905	0.494602	0.0745	0.286119
ENSSSCT00000026577	ENSSSCG00000027478	PPCDC	chr7:63214717-63238501	7.63005	4.72863	0.69027	0.0125	0.0846299	8.21681	4.72863	0.797155	0.0034	0.0332197
ENSSSCT00000003045	ENSSSCG00000002748	DHX38	chr6:14616072-14626549	7.22508	4.71752	0.614984	0.0062	0.0512756	7.98234	4.71752	0.758783	0.00055	0.00838524
ENSSSCT00000008161	ENSSSCG00000007457	SULF2	chr17:55891484-56009017	2.77805	4.71495	-0.763169	0.0073	0.0575607	2.65855	4.71495	-0.826604	0.0035	0.0339068
ENSSSCT00000009890	ENSSSCG00000009031	EDNRA	chr8:86290712-86319741	2.83315	4.69804	-0.729653	0.00205	0.02262	2.19415	4.69804	-1.0984	5e-05	0.00119245
ENSSSCT00000032617	ENSSSCG00000012144	GRPR	chrX:13603878-13640424	2.57358	4.66919	-0.859399	0.0024	0.0254043	2.85374	4.66919	-0.710322	0.0104	0.0742789
ENSSSCT00000014740	ENSSSCG00000013494	MATK	chr2:75503305-75510472	10.3879	4.66228	1.15579	5e-05	0.00119245	11.3679	4.66228	1.28585	5e-05	0.00119245
ENSSSCT00000003545	ENSSSCG00000003190	ADM5	chr6:50460669-50461602	2.80578	4.66194	-0.732528	0.04515	0.206786	3.55106	4.66194	-0.392681	0.26535	0.605446
ENSSSCT00000010790	ENSSSCG00000009844	HSPB8	chr14:35688332-35701411	9.64088	4.64255	1.05425	5e-05	0.00119245	8.23575	4.64255	0.826983	0.00165	0.0192591
ENSSSCT00000008302	ENSSSCG00000007568	IQCE	chr3:2124745-2162600	3.0508	4.64062	-0.605131	0.01765	0.108897	2.97787	4.64062	-0.640038	0.0123	0.0836743
ENSSSCT00000011352	ENSSSCG00000010370	ANXA8	chr14:95804111-95825709	1.08294	4.61182	-2.09039	5e-05	0.00119245	1.91155	4.61182	-1.2706	0.0003	0.00520502
ENSSSCT00000009282	ENSSSCG00000008480	MORN2	chr3:107607783-107611124	8.95671	4.5997	0.961429	0.0026	0.0269681	7.08985	4.5997	0.624215	0.0539	0.232656
ENSSSCT00000003483	ENSSSCG00000003141	FUT1	chr6:49824782-49827868	7.14931	4.59554	0.637568	0.0071	0.0564708	8.96593	4.59554	0.964218	5e-05	0.00119245
ENSSSCT00000014084	ENSSSCG00000012883	GAL	chr2:2931346-2937425	7.27106	4.58721	0.66455	0.02895	0.153448	7.03128	4.58721	0.616171	0.04755	0.21404
ENSSSCT00000007891	ENSSSCG00000007211	ZCCHC3	chr17:39663958-39665167	8.79482	4.58687	0.939145	0.0005	0.00778241	9.61008	4.58687	1.06704	0.0001	0.00214362
ENSSSCT00000005584	ENSSSCG00000005067	C14orf105	chr1:207166636-207202262	7.90002	4.56082	0.792563	0.00775	0.0600435	5.18274	4.56082	0.184422	0.5453	0.843819
ENSSSCT00000002653	ENSSSCG00000002386	IFT43	chr7:105268437-105299304	12.8928	4.55455	1.50119	0.00035	0.0058827	12.0994	4.55455	1.40956	0.0005	0.00778241
ENSSSCT00000003013	ENSSSCG00000002719	EXOSC6	chr6:13360784-13361651	10.8848	4.55014	1.25833	0.00015	0.00297337	13.3861	4.55014	1.55675	5e-05	0.00119245
ENSSSCT00000036577	ENSSSCG00000014047	FGFR4	chr2:82414996-82427326	7.0379	4.54589	0.630581	0.0213	0.123823	7.28958	4.54589	0.681272	0.0125	0.0846299
ENSSSCT00000011929	ENSSSCG00000010902	C1orf53	chr10:25338150-25347627	10.9907	4.53124	1.2783	0.00035	0.0058827	10.046	4.53124	1.14865	0.00115	0.01472
ENSSSCT00000010686	ENSSSCG00000009747	STX2	chr14:25870905-25922909	1.97669	4.52547	-1.19498	0.0125	0.0846299	1.69374	4.52547	-1.41786	0.0052	0.0451959
ENSSSCT00000003720	ENSSSCG00000003351	MMP23B	chr6:58231350-58233984	7.28588	4.51261	0.691143	0.0075	0.0586606	6.50289	4.51261	0.52712	0.043	0.200178
ENSSSCT00000023297	ENSSSCG00000026989	RAD51D	chr12:41565316-41577892	9.35749	4.51039	1.05287	0.0002	0.003754	10.0462	4.51039	1.15532	5e-05	0.00119245
ENSSSCT00000013473	ENSSSCG00000012322	KDM5C	chrX:51468792-51503194	9.78321	4.49736	1.12123	0.02525	0.13927	11.2689	4.49736	1.3252	0.00995	0.071989
ENSSSCT00000012090	ENSSSCG00000011046	ITGA8	chr10:50828507-51000248	2.38802	4.49037	-0.911017	0.0001	0.00214362	1.96068	4.49037	-1.19548	5e-05	0.00119245
ENSSSCT00000025060	ENSSSCG00000026123	IGFBP2	JH118558.1:46033-68435	8.44895	4.47051	0.918331	0.0096	0.0702912	7.55869	4.47051	0.757696	0.02905	0.1538
ENSSSCT00000023378	ENSSSCG00000022322	BCL2L11	JH118923.1:27423-54664	2.42381	4.46554	-0.881558	0.00405	0.0377656	2.02813	4.46554	-1.13868	0.0002	0.003754
ENSSSCT00000012427	ENSSSCG00000011350	CCDC51	chr13:34407778-34418022	13.6357	4.44981	1.61558	5e-05	0.00119245	15.9481	4.44981	1.84157	5e-05	0.00119245
ENSSSCT00000016243	ENSSSCG00000014889	NDUFC2	chr9:13821216-13827297	9.28809	4.44689	1.06258	0.0027	0.0277757	8.43263	4.44689	0.923185	0.0082	0.0626949
ENSSSCT00000008492	ENSSSCG00000007745	SUMF2	chr3:17074783-17095321	7.07143	4.44467	0.669926	0.0039	0.0367092	7.84222	4.44467	0.819188	0.0005	0.00778241
ENSSSCT00000016645	ENSSSCG00000015276	ETNK2	chr9:71059334-71080678	8.62639	4.43559	0.95963	0.00015	0.00297337	9.39957	4.43559	1.08347	5e-05	0.00119245
ENSSSCT00000027852	ENSSSCG00000029852	WNT5A	chr13:40871932-40892375	1.97829	4.4277	-1.1623	5e-05	0.00119245	1.63161	4.4277	-1.44026	5e-05	0.00119245
ENSSSCT00000007071	ENSSSCG00000006455	CD5L	chr4:100732582-100750193	10.6147	4.42652	1.26181	5e-05	0.00119245	7.93942	4.42652	0.842859	0.00045	0.00719494
ENSSSCT00000034703	ENSSSCG00000015116	MCAM	chr9:51548580-51557233	9.42556	4.42617	1.09052	0.00015	0.00297337	8.71489	4.42617	0.977425	0.00055	0.00838524
ENSSSCT00000012516	ENSSSCG00000011436	TLR9	chr13:37647228-37652020	2.47036	4.40933	-0.835838	0.0008	0.0111573	3.08799	4.40933	-0.51389	0.0273	0.147041
ENSSSCT00000031664	ENSSSCG00000028123	ACAD8	chr9:67348891-67366488	8.98487	4.39885	1.03037	0.0001	0.00214362	9.16129	4.39885	1.05842	0.00015	0.00297337
ENSSSCT00000029360	ENSSSCG00000006155	ZBTB10	chr4:61268303-61304788	2.33178	4.39484	-0.914381	0.04095	0.193893	1.14482	4.39484	-1.94069	0.00865	0.0651238
ENSSSCT00000007512	ENSSSCG00000006859	DPH5	chr4:128811651-128847959	7.07255	4.37309	0.693578	0.00205	0.02262	6.33502	4.37309	0.534698	0.01655	0.104046
ENSSSCT00000011175	ENSSSCG00000010209	FAM13C	chr14:67498080-67617064	2.48603	4.37021	-0.813856	0.00625	0.0515691	1.76235	4.37021	-1.3102	5e-05	0.00119245
ENSSSCT00000013694	ENSSSCG00000012525	BEX1	chrX:98011228-98012771	9.27363	4.36842	1.08602	0.00055	0.00838524	6.71548	4.36842	0.620379	0.043	0.200178
ENSSSCT00000035049	ENSSSCG00000008745	PROM1	chr8:10866625-10960945	2.38452	4.36555	-0.872465	0.0327	0.166697	1.78509	4.36555	-1.29016	0.0027	0.0277757
ENSSSCT00000001146	ENSSSCG00000001052	PHACTR1	chr7:9509244-9975455	1.9461	4.36513	-1.16544	0.03985	0.190446	1.48434	4.36513	-1.55621	0.02415	0.13529
ENSSSCT00000005278	ENSSSCG00000004779	PLCB2	chr1:146283054-146302583	2.86454	4.35441	-0.604173	0.00415	0.0383737	2.76744	4.35441	-0.653927	0.00155	0.0183734
ENSSSCT00000008928	ENSSSCG00000008151	MFSD9	chr3:53936751-53951235	9.59476	4.32308	1.15019	5e-05	0.00119245	11.7852	4.32308	1.44684	5e-05	0.00119245
ENSSSCT00000022504	ENSSSCG00000028593	TEPSIN	chr12:1429426-1439241	6.68379	4.3229	0.628668	0.00445	0.0402804	7.24722	4.3229	0.74543	0.00095	0.0127118
ENSSSCT00000006725	ENSSSCG00000006132	MMP16	chr4:53437526-53598063	2.73165	4.3118	-0.658519	0.01225	0.0834139	2.38863	4.3118	-0.852109	0.00095	0.0127118
ENSSSCT00000016563	ENSSSCG00000015197	SPA17	chr9:57436408-57448929	8.08392	4.29505	0.912381	0.00535	0.0461548	7.24854	4.29505	0.755015	0.02145	0.12448
ENSSSCT00000018652	ENSSSCG00000017134	FN3KRP	chr12:261599-269307	11.2041	4.29306	1.38395	5e-05	0.00119245	11.7703	4.29306	1.45508	5e-05	0.00119245
ENSSSCT00000014180	ENSSSCG00000012973	MUS81	chr2:5558976-5572868	6.84606	4.2699	0.681072	0.03745	0.182688	7.12312	4.2699	0.738308	0.0242	0.135511
ENSSSCT00000016646	ENSSSCG00000015277	SOX13	chr9:71086951-71095772	2.77492	4.25211	-0.615734	0.0344	0.172329	2.62856	4.25211	-0.693908	0.02095	0.122378
ENSSSCT00000018758	ENSSSCG00000017231	NAT9	chr12:6449635-6453205	10.7308	4.2371	1.34061	5e-05	0.00119245	12.3543	4.2371	1.54387	5e-05	0.00119245
ENSSSCT00000000500	ENSSSCG00000000462	TMEM5	chr5:31433452-31462279	6.46925	4.23493	0.61126	0.01635	0.103093	6.11385	4.23493	0.529741	0.0387	0.186651
ENSSSCT00000028568	ENSSSCG00000029058	C14H10orf116	chr14:95183008-95185230	15.502	4.23154	1.8732	5e-05	0.00119245	17.3783	4.23154	2.03804	5e-05	0.00119245
ENSSSCT00000023201	ENSSSCG00000009912	POP5	chr14:42990143-42993405	6.57288	4.22234	0.638483	0.0154	0.0986485	7.27952	4.22234	0.785802	0.0027	0.0277757
ENSSSCT00000008261	ENSSSCG00000007530	PPP1R3D	chr17:67408903-67409803	6.86043	4.19026	0.71126	0.01715	0.106666	8.43927	4.19026	1.01008	0.0006	0.00895758
ENSSSCT00000023382	ENSSSCG00000026707	XCR1	chr13:32247995-32256018	1.79606	4.18712	-1.22113	5e-05	0.00119245	1.58431	4.18712	-1.4021	5e-05	0.00119245
ENSSSCT00000028764	ENSSSCG00000025243	SGIP1	GL895308.2:181736-303300	2.70369	4.17945	-0.62838	0.01225	0.0834139	2.50394	4.17945	-0.739109	0.0046	0.0412761
ENSSSCT00000024824	ENSSSCG00000024695	NUDT16L1	chr3:38730149-38751123	10.4858	4.17917	1.32715	0.0421	0.197526	11.4852	4.17917	1.45848	0.0291	0.153924
ENSSSCT00000036531	ENSSSCG00000017306	ITGB3	chr12:16717753-16775469	2.41729	4.14698	-0.778668	0.03065	0.159266	2.55782	4.14698	-0.697147	0.0618	0.253894
ENSSSCT00000035802	ENSSSCG00000016504	TBXAS1	chr18:10223765-10394083	1.89781	4.13733	-1.12436	0.0205	0.120664	1.66111	4.13733	-1.31655	0.05625	0.239027
ENSSSCT00000024752	ENSSSCG00000027672	SUOX	GL893031.2:32675-36461	7.96499	4.11354	0.953293	0.00015	0.00297337	8.7627	4.11354	1.091	5e-05	0.00119245
ENSSSCT00000019536	ENSSSCG00000017952	SAT2	chr12:55260975-55262606	10.9273	4.09255	1.41686	5e-05	0.00119245	11.3521	4.09255	1.47189	5e-05	0.00119245
ENSSSCT00000014638	ENSSSCG00000013399	TEAD1	chr2:49852151-50007351	8.77676	4.08926	1.10185	0.0117	0.08083	5.86938	4.08926	0.521369	0.28845	0.632459
ENSSSCT00000008468	ENSSSCG00000007723	RCC1L	chr3:11634917-11669064	6.58783	4.08696	0.688774	0.00215	0.0234086	9.74788	4.08696	1.25406	5e-05	0.00119245
ENSSSCT00000007537	ENSSSCG00000006883	RWDD3	chr4:133994710-133998553	7.54445	4.08259	0.88593	0.00195	0.0218749	8.16113	4.08259	0.999284	0.0009	0.0122346
ENSSSCT00000017443	ENSSSCG00000016020	DUSP19	chr15:98104157-98124358	7.19203	4.07927	0.818087	0.0046	0.0412761	6.74073	4.07927	0.724592	0.012	0.0822103
ENSSSCT00000013587	ENSSSCG00000012426	ZDHHC15	chrX:68882474-69045188	2.0671	4.07926	-0.980702	0.00415	0.0383737	2.36905	4.07926	-0.783999	0.01495	0.0964515
ENSSSCT00000024133	ENSSSCG00000025524	CCDC137	GL896467.1:9314-17840	7.07162	4.0633	0.799389	0.0162	0.102359	6.96064	4.0633	0.776568	0.01945	0.116411
ENSSSCT00000025228	ENSSSCG00000023479	NCKAP5	chr15:21862471-21927980	2.15902	4.02938	-0.900182	0.00025	0.00449095	2.45873	4.02938	-0.712644	0.0022	0.0238111
ENSSSCT00000014044	ENSSSCG00000012849	TMEM80	chr2:240544-245782	10.7729	4.02235	1.42129	5e-05	0.00119245	13.1863	4.02235	1.71293	5e-05	0.00119245
ENSSSCT00000029720	ENSSSCG00000028847	DSC3	JH118612.1:153589-188200	2.49213	4.00753	-0.685332	0.01	0.0722201	2.5816	4.00753	-0.634448	0.0149	0.0962356
ENSSSCT00000003406	ENSSSCG00000003069	KCNN4	chr6:46440880-46454405	9.81183	3.99925	1.29479	5e-05	0.00119245	10.202	3.99925	1.35105	5e-05	0.00119245
ENSSSCT00000016253	ENSSSCG00000014898	DDIAS	chr9:18876946-18896503	2.4883	3.99441	-0.682821	0.0047	0.0419265	2.81768	3.99441	-0.503478	0.03755	0.182952
ENSSSCT00000009566	ENSSSCG00000028359	BST1	chr8:10659176-10694532	8.97536	3.99317	1.16843	0.0337	0.17002	9.8217	3.99317	1.29844	0.01885	0.113874
ENSSSCT00000033922	ENSSSCG00000006002	NOV	chr4:20522555-20533993	1.94197	3.99207	-1.03962	0.0002	0.003754	1.55088	3.99207	-1.36405	5e-05	0.00119245
ENSSSCT00000007195	ENSSSCG00000006567	CRTC2	chr4:104636617-104647384	2.25948	3.9859	-0.818911	0.00395	0.0370382	2.41015	3.9859	-0.725784	0.00865	0.0651238
ENSSSCT00000014145	ENSSSCG00000012940	B4GAT1	chr2:5120056-5122388	6.80476	3.98044	0.773618	0.0018	0.0205452	7.11008	3.98044	0.83694	0.00085	0.0116991
ENSSSCT00000030753	ENSSSCG00000022307	RAB7B	chr9:72916106-72946419	2.50627	3.97497	-0.665406	0.0067	0.0542606	2.47767	3.97497	-0.681963	0.00585	0.049169
ENSSSCT00000006423	ENSSSCG00000005844	NRARP	chr1:314083938-314084283	8.2771	3.96618	1.06138	0.0354	0.175538	8.42812	3.96618	1.08746	0.03665	0.179979
ENSSSCT00000008288	ENSSSCG00000007556	PSMG3	chr3:1167384-1168908	15.228	3.94718	1.94784	0.00035	0.0058827	18.8522	3.94718	2.25584	0.0001	0.00214362
ENSSSCT00000014724	ENSSSCG00000013478	DOHH	chr2:75730691-75739639	8.31057	3.94637	1.07442	5e-05	0.00119245	10.5893	3.94637	1.42401	5e-05	0.00119245
ENSSSCT00000013957	ENSSSCG00000012767	HAUS7	chrX:141801421-141821573	10.0208	3.93166	1.34979	5e-05	0.00119245	10.2548	3.93166	1.38308	5e-05	0.00119245
ENSSSCT00000028802	ENSSSCG00000029855	LHFP	chr11:14558883-14559276	12.9913	3.92244	1.72773	0.00065	0.00953497	12.0257	3.92244	1.61629	0.0017	0.0196705
ENSSSCT00000012123	ENSSSCG00000011077	MSRB2	chr10:57544111-57565782	8.78867	3.91767	1.16565	5e-05	0.00119245	8.29489	3.91767	1.08223	5e-05	0.00119245
ENSSSCT00000010506	ENSSSCG00000009585	GADD45G	chr14:1421135-1422690	7.62666	3.91102	0.963505	0.0058	0.0488708	9.57734	3.91102	1.29208	0.0003	0.00520502
ENSSSCT00000017377	ENSSSCG00000015959	RAPGEF4	chr15:88315022-88416687	2.37338	3.90654	-0.718945	0.00355	0.034246	2.27759	3.90654	-0.77838	0.00155	0.0183734
ENSSSCT00000008533	ENSSSCG00000007785	ZNF689	chr3:18223253-18227270	6.23705	3.90351	0.676094	0.0106	0.0753541	6.36355	3.90351	0.705061	0.00895	0.0666842
ENSSSCT00000031660	ENSSSCG00000021379	C1QTNF1	GL894007.1:40620-47818	6.29018	3.89191	0.692623	0.03485	0.173807	5.33407	3.89191	0.45476	0.18215	0.494893
ENSSSCT00000033280	ENSSSCG00000007528	PHACTR3	chr17:67046735-67283694	2.03869	3.86201	-0.921707	0.0253	0.139474	2.28896	3.86201	-0.754661	0.02375	0.133623
ENSSSCT00000003713	ENSSSCG00000003344	VWA1	chr6:58299022-58304156	7.31894	3.83571	0.932141	0.0002	0.003754	7.54776	3.83571	0.976555	5e-05	0.00119245
ENSSSCT00000019014	ENSSSCG00000017466	CCR7	chr12:22140213-22152154	6.77605	3.82972	0.823205	0.00205	0.02262	6.98468	3.82972	0.866955	0.0011	0.0142222
ENSSSCT00000030213	ENSSSCG00000029776	FAM219B	chr7:63339160-63346268	6.20225	3.82967	0.695572	0.0021	0.0230209	7.58108	3.82967	0.985183	5e-05	0.00119245
ENSSSCT00000010546	ENSSSCG00000009620	BMP1	chr14:6881425-6923145	5.9537	3.81946	0.640417	0.004	0.0373974	6.65937	3.81946	0.802017	0.0002	0.003754
ENSSSCT00000022345	ENSSSCG00000026636	ZBTB4	chr12:54986634-54990519	2.45611	3.8016	-0.630234	0.01315	0.0879696	2.55127	3.8016	-0.575392	0.02275	0.129719
ENSSSCT00000006478	ENSSSCG00000005899	MFSD3	chr4:384726-387190	6.39409	3.79347	0.753219	0.02165	0.125266	7.96936	3.79347	1.07094	0.00135	0.0165389
ENSSSCT00000008812	ENSSSCG00000008041	PKD1	chr3:42245979-42331947	5.93915	3.78098	0.651496	0.0224	0.128341	6.46558	3.78098	0.774019	0.00585	0.049169
ENSSSCT00000001838	ENSSSCG00000001653	PEX6	chr7:43486694-43500769	6.03522	3.75942	0.682897	0.0023	0.0246104	7.81129	3.75942	1.05505	5e-05	0.00119245
ENSSSCT00000017916	ENSSSCG00000016453	TCAF1	chr18:6950620-6972532	5.8284	3.7592	0.632673	0.0088	0.0658426	5.00577	3.7592	0.413164	0.08175	0.304602
ENSSSCT00000011136	ENSSSCG00000010170	DISC1	chr14:63329744-63441058	2.47785	3.75209	-0.598607	0.0354	0.175538	2.18689	3.75209	-0.77881	0.0063	0.051888
ENSSSCT00000006183	ENSSSCG00000005623	ST6GALNAC6	chr1:302295185-302305930	5.95074	3.74712	0.667288	0.00935	0.0689499	6.21789	3.74712	0.730643	0.00405	0.0377656
ENSSSCT00000014234	ENSSSCG00000013022	PYGM	chr2:6542312-6553842	12.9628	3.74382	1.79179	5e-05	0.00119245	7.63388	3.74382	1.02791	0.00015	0.00297337
ENSSSCT00000000742	ENSSSCG00000000681	P3H3	chr5:66307077-66319269	6.32011	3.73699	0.758073	0.0012	0.0151808	6.31468	3.73699	0.756832	0.00125	0.015631
ENSSSCT00000024228	ENSSSCG00000023603	UBALD1	chr3:38812750-38817771	6.13439	3.7067	0.726784	0.0119	0.0818143	6.25043	3.7067	0.75382	0.0091	0.067605
ENSSSCT00000029460	ENSSSCG00000029129	RWDD2A	chr1:93249517-93255101	2.3412	3.68606	-0.654832	0.00705	0.0562059	2.14491	3.68606	-0.781163	0.00115	0.01472
ENSSSCT00000007950	ENSSSCG00000007265	SNTA1	chr17:41868152-41896580	6.65207	3.66452	0.86018	0.00145	0.017463	8.07336	3.66452	1.13955	5e-05	0.00119245
ENSSSCT00000014886	ENSSSCG00000013631	TMED1	chr2:70007507-70009635	8.94506	3.6559	1.29086	5e-05	0.00119245	8.64496	3.6559	1.24163	0.00015	0.00297337
ENSSSCT00000023963	ENSSSCG00000029201	AJUBA	GL896299.1:26323-35700	5.90456	3.6478	0.694802	0.02315	0.131379	9.20563	3.6478	1.33549	5e-05	0.00119245
ENSSSCT00000027708	ENSSSCG00000025688	COX6A2	chr3:17385586-17389044	6.57837	3.63451	0.855967	0.0014	0.0169856	7.14243	3.63451	0.974653	0.0005	0.00778241
ENSSSCT00000030404	ENSSSCG00000028631	PIN1	chr2:68943610-68957203	2.09075	3.63126	-0.796448	0.0185	0.11261	3.6116	3.63126	-0.00783326	0.97855	0.993691
ENSSSCT00000012005	ENSSSCG00000010968	IL11RA	chr10:36278904-36289170	8.53397	3.62595	1.23486	5e-05	0.00119245	9.04912	3.62595	1.31942	5e-05	0.00119245
ENSSSCT00000010212	ENSSSCG00000009320	FLT1	chr11:5309663-5455380	2.20772	3.62261	-0.71447	0.00585	0.049169	2.67251	3.62261	-0.438831	0.07795	0.294752
ENSSSCT00000005270	ENSSSCG00000004771	CHST14	chr1:145931050-145932181	5.67713	3.62053	0.64896	0.02725	0.146883	5.85788	3.62053	0.694176	0.01995	0.118363
ENSSSCT00000035297	ENSSSCG00000024604	ATAT1	chr7:26895068-26907386	1.49232	3.61649	-1.27703	0.0118	0.0813015	1.35743	3.61649	-1.41371	0.02455	0.136765
ENSSSCT00000005162	ENSSSCG00000004676	DUOXA2	chr1:141201515-141205257	1.40734	3.61102	-1.35943	0.00035	0.0058827	1.31284	3.61102	-1.45971	5e-05	0.00119245
ENSSSCT00000023944	ENSSSCG00000022319	ZNF784	chr6:54591823-54592639	5.92858	3.59923	0.719999	0.0334	0.169106	6.69886	3.59923	0.896228	0.00705	0.0562059
ENSSSCT00000008781	ENSSSCG00000008013	IGFALS	chr3:41634232-41640697	6.45051	3.57631	0.850942	0.00165	0.0192591	5.63197	3.57631	0.655169	0.01855	0.112807
ENSSSCT00000008316	ENSSSCG00000007577	AP5Z1	chr3:4281220-4363672	5.77034	3.56602	0.694341	0.00725	0.0572935	6.03967	3.56602	0.760153	0.00345	0.0335647
ENSSSCT00000002646	ENSSSCG00000002379	ACYP1	chr7:104093821-104109273	7.45865	3.53251	1.07822	0.0014	0.0169856	7.90275	3.53251	1.16166	0.00065	0.00953497
ENSSSCT00000000798	ENSSSCG00000000735	TSPAN9	chr5:69219129-69394433	6.08357	3.5302	0.785168	0.0004	0.00655605	6.19765	3.5302	0.81197	0.00025	0.00449095
ENSSSCT00000010653	ENSSSCG00000009717	CBR4	chr14:21908679-21929202	6.54576	3.52549	0.892737	0.0003	0.00520502	7.04382	3.52549	0.998535	5e-05	0.00119245
ENSSSCT00000001749	ENSSSCG00000001570	PI16	chr7:37504336-37514234	6.74651	3.51028	0.942553	0.00095	0.0127118	6.88316	3.51028	0.971484	0.0006	0.00895758
ENSSSCT00000000208	ENSSSCG00000000195	PRPH	chr5:15691968-15695232	8.84165	3.49898	1.33738	5e-05	0.00119245	7.7975	3.49898	1.15608	5e-05	0.00119245
ENSSSCT00000010668	ENSSSCG00000009730	ZNF26	chr14:23993465-24008489	6.08823	3.47674	0.80829	0.001	0.013215	6.53045	3.47674	0.909449	0.0003	0.00520502
ENSSSCT00000024631	ENSSSCG00000028060	SLC4A8	chr5:17478544-17521947	1.93854	3.47625	-0.842562	0.002	0.0222139	1.72118	3.47625	-1.01413	0.0001	0.00214362
ENSSSCT00000003984	ENSSSCG00000003589	MECR	chr6:79984218-80018092	5.47416	3.47602	0.6552	0.0039	0.0367092	6.1819	3.47602	0.830613	0.00045	0.00719494
ENSSSCT00000024018	ENSSSCG00000023653	GLIS2	chr3:39051644-39074932	5.92058	3.46599	0.772473	0.01315	0.0879696	6.90129	3.46599	0.993599	0.00215	0.0234086
ENSSSCT00000018458	ENSSSCG00000016950	SGTB	chr16:47533975-47681209	2.20664	3.46596	-0.651405	0.0134	0.0891573	2.43932	3.46596	-0.506774	0.0539	0.232656
ENSSSCT00000013649	ENSSSCG00000012482	SRPX2	chrX:90178154-90205276	2.07061	3.46344	-0.742147	0.0073	0.0575607	1.88964	3.46344	-0.87409	0.0015	0.0178968
ENSSSCT00000005534	ENSSSCG00000005018	CDKL1	chr1:200424776-200440531	2.07848	3.45643	-0.733755	0.0283	0.15094	1.78445	3.45643	-0.953802	0.00435	0.0396727
ENSSSCT00000010572	ENSSSCG00000009644	ADAM28	chr14:9426168-9481493	2.25924	3.44794	-0.609896	0.02075	0.121643	2.38628	3.44794	-0.530967	0.04475	0.205528
ENSSSCT00000019346	ENSSSCG00000017774	FAM222B	chr12:47004046-47033187	1.77631	3.44681	-0.956376	5e-05	0.00119245	2.04033	3.44681	-0.756462	0.0021	0.0230209
ENSSSCT00000019498	ENSSSCG00000017916	TM4SF5	chr12:54332089-54338827	6.46136	3.44552	0.907118	0.00945	0.0694792	8.79033	3.44552	1.3512	5e-05	0.00119245
ENSSSCT00000006011	ENSSSCG00000005465	SUSD1	chr1:283606226-283742651	2.12688	3.44342	-0.695106	0.0012	0.0151808	2.02614	3.44342	-0.765106	0.00125	0.015631
ENSSSCT00000012894	ENSSSCG00000011782	ABCC5	chr13:131309016-131364828	5.35897	3.42336	0.646544	0.0047	0.0419265	5.81047	3.42336	0.763242	0.00115	0.01472
ENSSSCT00000007145	ENSSSCG00000006524	THBS3	chr4:103395529-103406728	6.26486	3.42284	0.872088	0.00035	0.0058827	6.23968	3.42284	0.866278	0.0005	0.00778241
ENSSSCT00000012706	ENSSSCG00000011609	FBLN2	chr13:78256433-78359474	5.40344	3.42083	0.659529	0.0075	0.0586606	5.29488	3.42083	0.63025	0.00955	0.0700293
ENSSSCT00000023295	ENSSSCG00000022029	RAP1GAP	GL893988.2:50805-80515	2.1377	3.3703	-0.656822	0.01915	0.115089	2.39166	3.3703	-0.494863	0.07105	0.277907
ENSSSCT00000028536	ENSSSCG00000026554	FAM213B	chr6:58856808-58859702	6.56075	3.34729	0.970868	0.0107	0.0757871	6.46506	3.34729	0.949671	0.0128	0.086205
ENSSSCT00000017999	ENSSSCG00000016531	C7orf49	chr18:14935739-14940095	5.40388	3.34014	0.694084	0.0344	0.172329	6.20773	3.34014	0.894156	0.00705	0.0562059
ENSSSCT00000029539	ENSSSCG00000022585	C1orf54	GL893333.2:19582-27231	5.68718	3.32688	0.773543	0.00525	0.045513	5.80844	3.32688	0.80398	0.0044	0.0400203
ENSSSCT00000001070	ENSSSCG00000000980	ALG12	chr5:110955258-110962336	6.62491	3.31911	0.997104	5e-05	0.00119245	7.37276	3.31911	1.15141	5e-05	0.00119245
ENSSSCT00000012827	ENSSSCG00000011717	IGSF10	chr13:99846479-99878920	2.07172	3.31587	-0.678562	0.004	0.0373974	2.02407	3.31587	-0.712132	0.0018	0.0205452
ENSSSCT00000034473	ENSSSCG00000005998	DEPTOR	chr4:20006540-20171545	15.5744	3.30047	2.23843	0.04845	0.216719	14.4383	3.30047	2.12916	0.05475	0.234994
ENSSSCT00000029604	ENSSSCG00000025425	FUK	GL894187.1:22142-37699	6.90306	3.28896	1.06961	5e-05	0.00119245	7.52959	3.28896	1.19494	5e-05	0.00119245
ENSSSCT00000033853	ENSSSCG00000012448	ITM2A	chrX:72699044-72706320	8.34338	3.27849	1.3476	0.00265	0.0273669	6.5512	3.27849	0.998728	0.0173	0.107379
ENSSSCT00000006432	ENSSSCG00000005853	NOXA1	chr1:314012834-314022112	7.501	3.25071	1.20633	5e-05	0.00119245	10.872	3.25071	1.7418	5e-05	0.00119245
ENSSSCT00000008255	ENSSSCG00000007527	EDN3	chr17:66846228-66869088	5.99856	3.24848	0.884852	0.0009	0.0122346	7.61647	3.24848	1.22936	5e-05	0.00119245
ENSSSCT00000030407	ENSSSCG00000022618	CMTM8	chr13:20444835-20549145	5.86228	3.24103	0.855009	0.0347	0.173262	5.7616	3.24103	0.830016	0.04045	0.192294
ENSSSCT00000006488	ENSSSCG00000005908	CU468594.8	chr4:509913-516120	6.99435	3.23878	1.11074	0.0092	0.068158	9.01042	3.23878	1.47614	0.00095	0.0127118
ENSSSCT00000026585	ENSSSCG00000023814	FAIM	chr13:87082122-87091700	4.92231	3.23533	0.605426	0.04915	0.218886	4.86226	3.23533	0.587718	0.05505	0.235775
ENSSSCT00000010188	ENSSSCG00000009300	WASF3	chr11:3766416-3791563	1.40533	3.22892	-1.20015	0.001	0.013215	1.32468	3.22892	-1.28541	0.0004	0.00655605
ENSSSCT00000010818	ENSSSCG00000009870	SDSL	chr14:40882874-40895873	11.2349	3.22179	1.80205	5e-05	0.00119245	14.8883	3.22179	2.20825	5e-05	0.00119245
ENSSSCT00000011190	ENSSSCG00000010224	EGR2	chr14:71516962-71521113	1.84395	3.21398	-0.801563	0.0027	0.0277757	1.39869	3.21398	-1.20029	5e-05	0.00119245
ENSSSCT00000022858	ENSSSCG00000022118	ZBED6CL	GL892911.1:266178-266946	7.61836	3.21008	1.24687	0.0012	0.0151808	10.6701	3.21008	1.73289	5e-05	0.00119245
ENSSSCT00000034708	ENSSSCG00000021647	EDA	chrX:62968894-63300538	5.66319	3.2054	0.821112	0.0132	0.0882579	5.13045	3.2054	0.678581	0.04115	0.194451
ENSSSCT00000019255	ENSSSCG00000017691	MRM1	chr12:39742894-39748445	6.06169	3.20366	0.920001	0.0002	0.003754	7.17139	3.20366	1.16253	5e-05	0.00119245
ENSSSCT00000013293	ENSSSCG00000012152	SCML1	chrX:15307033-15317312	1.43536	3.20144	-1.15731	0.00175	0.0201145	1.49822	3.20144	-1.09547	0.0029	0.0293426
ENSSSCT00000001710	ENSSSCG00000001535	TCP11	chr7:35783269-35807767	5.14271	3.19892	0.684941	0.0223	0.127997	5.19648	3.19892	0.699949	0.01755	0.10851
ENSSSCT00000013037	ENSSSCG00000011914	ZDHHC23	chr13:155573606-155584372	5.59745	3.19407	0.809376	0.0024	0.0254043	6.46857	3.19407	1.01805	5e-05	0.00119245
ENSSSCT00000011415	ENSSSCG00000010430	CSTF2T	chr14:106806210-106808058	5.24872	3.19113	0.717899	0.0073	0.0575607	6.15151	3.19113	0.946872	0.0005	0.00778241
ENSSSCT00000023680	ENSSSCG00000022989	ZNF704	chr4:61054001-61104138	1.68694	3.18995	-0.919126	0.0143	0.0934451	1.7392	3.18995	-0.875114	0.01905	0.114671
ENSSSCT00000029566	ENSSSCG00000024757	GIMD1	chr8:123817617-123827003	6.91763	3.18704	1.11806	0.00275	0.0281588	6.26987	3.18704	0.976219	0.0083	0.0632403
ENSSSCT00000012650	ENSSSCG00000011559	IL17RC	chr13:73254873-73270469	5.3565	3.18507	0.749965	0.01065	0.0755668	5.10688	3.18507	0.681116	0.0188	0.113701
ENSSSCT00000005813	ENSSSCG00000005278	PRUNE2	chr1:256320553-256399971	5.17816	3.18172	0.702634	0.00445	0.0402804	3.68202	3.18172	0.21069	0.36095	0.705871
ENSSSCT00000027510	ENSSSCG00000027286	DGKQ	GL893376.1:31436-40806	5.19025	3.16559	0.713332	0.0036	0.0345772	4.79113	3.16559	0.597894	0.0139	0.0914288
ENSSSCT00000024450	ENSSSCG00000028974	UST	chr1:19295045-19463192	1.89228	3.16217	-0.740787	0.0112	0.0783229	1.84075	3.16217	-0.780622	0.0073	0.0575607
ENSSSCT00000008948	ENSSSCG00000008171	NPAS2	chr3:55844995-56034828	1.70596	3.15888	-0.888831	0.0009	0.0122346	1.7638	3.15888	-0.840722	0.00115	0.01472
ENSSSCT00000017562	ENSSSCG00000016129	GPR1	chr15:121014584-121015676	1.89435	3.1572	-0.736939	0.03925	0.188366	1.66856	3.1572	-0.920038	0.0117	0.08083
ENSSSCT00000035618	ENSSSCG00000012576	CHRDL1	chrX:104266413-104398296	6.00243	3.15415	0.928295	0.00345	0.0335647	5.64893	3.15415	0.840726	0.0071	0.0564708
ENSSSCT00000035354	ENSSSCG00000001242	GABBR1	chr7:25210912-25240202	1.49475	3.15087	-1.07584	0.04925	0.219149	0.0925804	3.15087	-5.0889	0.20285	0.525752
ENSSSCT00000010776	ENSSSCG00000009832	FAM109A	chr14:34591295-34591955	6.44541	3.13594	1.03937	0.0081	0.062101	5.79715	3.13594	0.886445	0.02265	0.129345
ENSSSCT00000029822	ENSSSCG00000023378	ZNF316	chr3:144267450-144281304	6.79245	3.12881	1.11832	5e-05	0.00119245	7.26353	3.12881	1.21506	5e-05	0.00119245
ENSSSCT00000030452	ENSSSCG00000027928	TMEM9	chr10:28017150-28031663	5.12452	3.11117	0.719961	0.00465	0.0415674	4.8033	3.11117	0.62657	0.01265	0.0854646
ENSSSCT00000030170	ENSSSCG00000028382	PCDHGA12	chr2:149276951-149279387	1.63935	3.10817	-0.922941	0.00225	0.0242293	1.41759	3.10817	-1.13263	5e-05	0.00119245
ENSSSCT00000004047	ENSSSCG00000003651	RHBDL2	chr6:87871030-87912911	2.01467	3.10543	-0.624249	0.01815	0.111008	1.55248	3.10543	-1.00022	0.00025	0.00449095
ENSSSCT00000022700	ENSSSCG00000023932	PCDHGB7	chr2:149264941-149269189	1.9261	3.09915	-0.686187	0.017	0.106011	2.40684	3.09915	-0.364735	0.17	0.476115
ENSSSCT00000009361	ENSSSCG00000008556	KHK	chr3:119019721-119030158	6.23319	3.09799	1.00864	0.0487	0.217549	7.10693	3.09799	1.1979	0.02515	0.13885
ENSSSCT00000028067	ENSSSCG00000023850	SDHAF3	chr9:84323978-84325850	2.04239	3.08803	-0.59643	0.0441	0.203654	2.27319	3.08803	-0.441969	0.13965	0.42416
ENSSSCT00000009529	ENSSSCG00000008710	JAKMIP1	chr8:2813114-2851074	4.74769	3.08475	0.622074	0.02115	0.123254	4.39671	3.08475	0.511272	0.0547	0.234826
ENSSSCT00000016816	ENSSSCG00000015436	CCDC71L	chr9:117342024-117342987	5.16619	3.08304	0.744748	0.03905	0.187759	7.38075	3.08304	1.25942	0.00045	0.00719494
ENSSSCT00000022764	ENSSSCG00000025560	PGLYRP2	chr2:61567646-61572252	5.59239	3.07092	0.864797	0.0024	0.0254043	7.36208	3.07092	1.26144	0.0002	0.003754
ENSSSCT00000018754	ENSSSCG00000017227	FDXR	chr12:6362553-6373263	5.36832	3.06836	0.807003	0.00145	0.017463	5.89181	3.06836	0.941246	0.00015	0.00297337
ENSSSCT00000003594	ENSSSCG00000003235	CTU1	chr6:51794580-51798403	6.55259	3.0543	1.10122	0.0001	0.00214362	7.95925	3.0543	1.38179	5e-05	0.00119245
ENSSSCT00000013101	ENSSSCG00000011973	COL8A1	chr13:169086151-169091372	8.75834	3.05429	1.51982	5e-05	0.00119245	7.8623	3.05429	1.36411	5e-05	0.00119245
ENSSSCT00000014108	ENSSSCG00000012905	TMEM134	chr2:3775764-3782603	4.97228	3.02677	0.716132	0.00345	0.0335647	5.22072	3.02677	0.786472	0.00105	0.0137227
ENSSSCT00000011513	ENSSSCG00000010523	HOGA1	chr14:118462771-118490338	6.98838	3.02282	1.20906	5e-05	0.00119245	5.82455	3.02282	0.946251	0.0003	0.00520502
ENSSSCT00000006226	ENSSSCG00000005663	KYAT1	chr1:303188688-303225560	6.56964	3.02112	1.12073	5e-05	0.00119245	6.61462	3.02112	1.13057	5e-05	0.00119245
ENSSSCT00000005245	ENSSSCG00000004746	ITPKA	chr1:144939061-144947605	5.15777	3.01027	0.776857	0.0026	0.0269681	6.74374	3.01027	1.16366	5e-05	0.00119245
ENSSSCT00000013203	ENSSSCG00000012071	IGSF5	chr13:213446784-213480182	5.2485	3.00332	0.805347	0.0123	0.0836743	5.12188	3.00332	0.770114	0.0181	0.110787
ENSSSCT00000004722	ENSSSCG00000004273	COL19A1	chr1:56170357-56555009	4.8381	2.99727	0.690793	0.0407	0.193081	4.23882	2.99727	0.500015	0.1355	0.416698
ENSSSCT00000024421	ENSSSCG00000027664	REPIN1	GL893503.1:20062-44977	4.59443	2.99281	0.618384	0.0335	0.169412	5.23967	2.99281	0.807974	0.0064	0.0524551
ENSSSCT00000032386	ENSSSCG00000024071	SCARF1	chr12:49731947-49741613	4.50857	2.98567	0.594614	0.0204	0.120318	4.7087	2.98567	0.657273	0.00915	0.0678504
ENSSSCT00000026479	ENSSSCG00000004281	KCNQ5	chr1:59101857-59277108	1.56709	2.97694	-0.925739	0.00015	0.00297337	1.54005	2.97694	-0.950851	0.0001	0.00214362
ENSSSCT00000012845	ENSSSCG00000011734	ARL14	chr13:108688053-108688632	22.797	2.97111	2.93977	5e-05	0.00119245	18.9047	2.97111	2.66967	5e-05	0.00119245
ENSSSCT00000015300	ENSSSCG00000014007	FLT4	chr2:79479772-79502309	4.56307	2.96734	0.620833	0.008	0.0615186	4.22904	2.96734	0.51116	0.0295	0.155283
ENSSSCT00000025853	ENSSSCG00000023688	IFNLR1	JH118535.1:30392-41620	5.86586	2.93971	0.996668	0.0005	0.00778241	5.96846	2.93971	1.02168	0.00045	0.00719494
ENSSSCT00000016205	ENSSSCG00000014853	GDPD5	chr9:10840404-10883005	4.4279	2.93059	0.595431	0.0083	0.0632403	4.42349	2.93059	0.593993	0.0083	0.0632403
ENSSSCT00000009544	ENSSSCG00000008724	ACOX3	chr8:4391406-4418761	5.14862	2.92694	0.814794	0.003	0.0300926	5.06909	2.92694	0.792335	0.0036	0.0345772
ENSSSCT00000005824	ENSSSCG00000005287	PSAT1	chr1:257809814-257834732	4.81586	2.9225	0.720589	0.0142	0.092896	5.42968	2.9225	0.893661	0.00225	0.0242293
ENSSSCT00000005466	ENSSSCG00000004954	C15orf61	chr1:183126893-183131818	7.71367	2.91644	1.40321	0.0001	0.00214362	7.50397	2.91644	1.36344	0.0002	0.003754
ENSSSCT00000014222	ENSSSCG00000013011	SAC3D1	chr2:6270449-6273674	6.55406	2.9137	1.16954	0.0001	0.00214362	6.69797	2.9137	1.20087	0.0001	0.00214362
ENSSSCT00000005302	ENSSSCG00000004803	ACTC1	chr1:152412333-152417610	9.16415	2.90094	1.65948	5e-05	0.00119245	5.37923	2.90094	0.890882	0.00445	0.0402804
ENSSSCT00000010929	ENSSSCG00000009973	RHBDD3	chr14:49367967-49371139	6.3502	2.89701	1.13224	5e-05	0.00119245	6.17983	2.89701	1.093	0.00015	0.00297337
ENSSSCT00000001724	ENSSSCG00000001546	FANCE	chr7:36111075-36123998	7.57486	2.88637	1.39196	0.0003	0.00520502	8.41876	2.88637	1.54435	0.00015	0.00297337
ENSSSCT00000018975	ENSSSCG00000017429	P3H4	chr12:21185690-21195355	5.12587	2.87464	0.834417	0.00095	0.0127118	5.22227	2.87464	0.861296	0.00055	0.00838524
ENSSSCT00000018048	ENSSSCG00000016578	FLNC	chr18:20855083-20884021	10.0504	2.87348	1.80639	5e-05	0.00119245	6.34368	2.87348	1.14252	5e-05	0.00119245
ENSSSCT00000007377	ENSSSCG00000006734	CD101	chr4:113657783-113699309	1.73844	2.85695	-0.716682	0.0145	0.0943857	1.57338	2.85695	-0.860608	0.0034	0.0332197
ENSSSCT00000016170	ENSSSCG00000014819	ATG16L2	chr9:8108619-8122236	4.67472	2.84019	0.718892	0.00465	0.0415674	4.75276	2.84019	0.742778	0.0037	0.0352729
ENSSSCT00000028414	ENSSSCG00000004898	TNFRSF11A	chr1:176595773-176650046	6.75151	2.83759	1.25055	0.0043	0.0393907	7.18714	2.83759	1.34075	0.00245	0.025797
ENSSSCT00000015491	ENSSSCG00000014179	FAM174A	chr2:110536478-110563848	5.30661	2.83302	0.905452	0.00025	0.00449095	4.33958	2.83302	0.615217	0.01395	0.0916729
ENSSSCT00000001970	ENSSSCG00000001762	CIB2	chr7:53340540-53365176	5.25302	2.81709	0.898941	0.0021	0.0230209	4.07027	2.81709	0.530919	0.07535	0.287984
ENSSSCT00000003569	ENSSSCG00000003214	KCNC3	chr6:51051581-51065701	1.53014	2.81	-0.876913	0.00095	0.0127118	2.38142	2.81	-0.23875	0.34235	0.688066
ENSSSCT00000017584	ENSSSCG00000016151	MAP2	chr15:124103822-124184566	1.84458	2.78016	-0.591876	0.0056	0.0476499	1.73652	2.78016	-0.678969	0.0024	0.0254043
ENSSSCT00000005743	ENSSSCG00000026305	PDCD1LG2	GL896018.1:1858-35531	1.62095	2.75383	-0.764601	0.0206	0.121063	0.998382	2.75383	-1.46377	0.0002	0.003754
ENSSSCT00000000180	ENSSSCG00000000171	CKAP4	chr5:14098330-14106287	6.90286	2.75004	1.32774	5e-05	0.00119245	7.62688	2.75004	1.47164	5e-05	0.00119245
ENSSSCT00000007066	ENSSSCG00000006451	PCD1B	chr4:100378041-100383563	1.20876	2.74762	-1.18466	0.00315	0.0312883	1.21831	2.74762	-1.1733	0.00195	0.0218749
ENSSSCT00000007747	ENSSSCG00000007076	NDUFAF5	chr17:25160223-25188788	6.47443	2.74711	1.23684	5e-05	0.00119245	7.65578	2.74711	1.47863	5e-05	0.00119245
ENSSSCT00000004335	ENSSSCG00000003920	HPDL	chr6:153420625-153422621	4.19068	2.74491	0.610424	0.02015	0.119218	4.74338	2.74491	0.789157	0.0034	0.0332197
ENSSSCT00000032732	ENSSSCG00000000660	A2M	chr5:65243775-65320386	4.16829	2.74142	0.604535	0.03235	0.165413	3.07187	2.74142	0.164197	0.56015	0.852029
ENSSSCT00000006187	ENSSSCG00000005627	AK1	chr1:302277901-302287920	4.52643	2.73556	0.726537	0.01575	0.100248	4.99609	2.73556	0.868963	0.00465	0.0415674
ENSSSCT00000011732	ENSSSCG00000010721	PSTK	chr14:144118543-144126472	7.07053	2.71824	1.37915	0.0003	0.00520502	6.94157	2.71824	1.35259	0.00045	0.00719494
ENSSSCT00000005394	ENSSSCG00000004888	SERPINB8	chr1:175308395-175324323	1.65139	2.71527	-0.717419	0.0084	0.0638047	1.4034	2.71527	-0.952176	0.0006	0.00895758
ENSSSCT00000015441	ENSSSCG00000014137	HAPLN1	chr2:93942377-93981389	4.56867	2.70462	0.756347	0.0015	0.0178968	3.72378	2.70462	0.461341	0.0563	0.23916
ENSSSCT00000010557	ENSSSCG00000009630	EGR3	chr14:7426275-7428160	1.09598	2.68932	-1.29502	0.00395	0.0370382	0.874369	2.68932	-1.62093	0.0002	0.003754
ENSSSCT00000007456	ENSSSCG00000006808	SLC16A4	chr4:120134626-120159547	1.75784	2.68642	-0.611881	0.0363	0.178713	2.17559	2.68642	-0.304279	0.2726	0.613774
ENSSSCT00000003729	ENSSSCG00000003360	WRAP73	chr6:59872017-59888257	4.71171	2.68272	0.812554	0.0229	0.130307	4.78541	2.68272	0.834947	0.0186	0.113025
ENSSSCT00000015647	ENSSSCG00000014321	KLHL3	chr2:145357373-145464551	4.83072	2.67162	0.854525	0.00265	0.0273669	4.86142	2.67162	0.863665	0.0024	0.0254043
ENSSSCT00000036486	ENSSSCG00000003722	CDH2	chr6:105486590-105518711	11.683	2.66986	2.12958	0.02775	0.148926	10.254	2.66986	1.94135	0.0375	0.18282
ENSSSCT00000005117	ENSSSCG00000004633	TNFAIP8L3	chr1:134119714-134120323	5.23605	2.65772	0.978291	0.01425	0.0931659	3.62445	2.65772	0.447575	0.2709	0.611777
ENSSSCT00000011604	ENSSSCG00000010608	SFR1	chr14:124982708-124986320	6.00874	2.64164	1.18563	0.001	0.013215	5.77806	2.64164	1.12915	0.0018	0.0205452
ENSSSCT00000007622	ENSSSCG00000006957	RHPN1	chr4:1121802-1131858	6.25587	2.64078	1.24425	0.0002	0.003754	5.89595	2.64078	1.15876	0.00025	0.00449095
ENSSSCT00000017352	ENSSSCG00000015936	PHOSPHO2	chr15:85127154-85133913	4.67005	2.63927	0.823302	0.005	0.043935	4.28146	2.63927	0.697967	0.01815	0.111008
ENSSSCT00000003805	ENSSSCG00000003428	MTHFR	chr6:65755346-65789128	4.3709	2.63872	0.728092	0.00125	0.015631	4.05317	2.63872	0.619214	0.0062	0.0512756
ENSSSCT00000011739	ENSSSCG00000010728	CPXM2	chr14:144881644-145010683	5.17929	2.62211	0.982026	0.00045	0.00719494	4.56994	2.62211	0.801447	0.00295	0.0297356
ENSSSCT00000018781	ENSSSCG00000017252	KCNJ2	JH118414.1:92221-93638	1.17927	2.55737	-1.11677	0.00535	0.0461548	1.11374	2.55737	-1.19925	0.0037	0.0352729
ENSSSCT00000023373	ENSSSCG00000023974	PHF21A	chr2:17968506-18017928	1.64982	2.54535	-0.625558	0.0072	0.0570252	1.5924	2.54535	-0.676662	0.0035	0.0339068
ENSSSCT00000014306	ENSSSCG00000013088	LRRC10B	chr2:9568402-9569199	4.52821	2.53362	0.837741	0.0295	0.155283	4.16804	2.53362	0.718166	0.06345	0.2584
ENSSSCT00000006892	ENSSSCG00000006289	F5	chr4:89027935-89109573	1.37277	2.5322	-0.883306	0.0001	0.00214362	1.15462	2.5322	-1.13298	5e-05	0.00119245
ENSSSCT00000012313	ENSSSCG00000011246	VILL	chr13:24848153-24867896	4.32705	2.51135	0.784925	0.00225	0.0242293	4.83616	2.51135	0.945402	0.0003	0.00520502
ENSSSCT00000015048	ENSSSCG00000013773	ADGRL1	chr2:65300765-65319593	3.8613	2.49766	0.628507	0.00915	0.0678504	3.31696	2.49766	0.409283	0.08145	0.303732
ENSSSCT00000017819	ENSSSCG00000016364	GPC1	chr15:154436054-154449107	4.02118	2.48983	0.691572	0.0035	0.0339068	4.89131	2.48983	0.974174	0.00015	0.00297337
ENSSSCT00000025319	ENSSSCG00000022187	CISD3	GL896254.1:6274-9094	9.22048	2.48445	1.89191	0.00465	0.0415674	10.5618	2.48445	2.08786	0.00235	0.0250032
ENSSSCT00000029685	ENSSSCG00000005110	SYNE2	chr1:215794611-216064625	8.68901	2.48103	1.80825	0.00925	0.0684333	9.59936	2.48103	1.952	0.00625	0.0515691
ENSSSCT00000005480	ENSSSCG00000004968	PAQR5	chr1:185180451-185203709	3.79738	2.46798	0.621676	0.03405	0.171313	2.3719	2.46798	-0.0572874	0.84785	0.967496
ENSSSCT00000009861	ENSSSCG00000009004	SFRP2	chr8:79743274-79751980	3.92978	2.46472	0.673022	0.013	0.0871757	2.98186	2.46472	0.274786	0.3153	0.660483
ENSSSCT00000029485	ENSSSCG00000029333	RASD1	chr12:63124507-63136113	4.33228	2.45413	0.819915	0.00105	0.0137227	4.89373	2.45413	0.995723	5e-05	0.00119245
ENSSSCT00000013505	ENSSSCG00000012350	MAGEH1	chrX:54057687-54059104	4.79572	2.44764	0.970356	0.00145	0.017463	5.16189	2.44764	1.07651	0.00035	0.0058827
ENSSSCT00000015158	ENSSSCG00000013875	USE1	chr2:60079149-60083113	3.91123	2.44761	0.676252	0.03915	0.188084	3.95416	2.44761	0.692001	0.0347	0.173262
ENSSSCT00000012534	ENSSSCG00000011453	ITIH4	chr13:38197432-38208928	4.5378	2.44489	0.892224	0.0023	0.0246104	8.17098	2.44489	1.74074	5e-05	0.00119245
ENSSSCT00000003258	ENSSSCG00000029875	ZNF529	chr6:41267820-41275589	3.92364	2.44244	0.683868	0.02005	0.118791	4.02272	2.44244	0.719847	0.0152	0.0977392
ENSSSCT00000024059	ENSSSCG00000024430	HES4	chr6:57945475-57946990	4.59261	2.43732	0.914019	0.0058	0.0488708	7.26642	2.43732	1.57595	5e-05	0.00119245
ENSSSCT00000003931	ENSSSCG00000003539	GRHL3	chr6:75674750-75698949	1.27975	2.42507	-0.922164	0.0033	0.0324458	1.42423	2.42507	-0.767848	0.0089	0.0663967
ENSSSCT00000024016	ENSSSCG00000022945	UCHL1	chr8:33970636-33982093	4.79142	2.42088	0.984926	0.0139	0.0914288	4.74598	2.42088	0.971176	0.01475	0.0955755
ENSSSCT00000024713	ENSSSCG00000026268	DLG5	chr14:86827156-86907472	4.74687	2.40666	0.979946	0.0267	0.144858	8.38176	2.40666	1.80022	0.0004	0.00655605
ENSSSCT00000031462	ENSSSCG00000027061	ENGASE	GL894007.1:60045-69534	6.92104	2.40453	1.52524	5e-05	0.00119245	7.56095	2.40453	1.65281	5e-05	0.00119245
ENSSSCT00000026802	ENSSSCG00000027130	TNFRSF12A	chr3:40522156-40533352	4.95999	2.40219	1.04599	0.016	0.101386	6.88006	2.40219	1.51807	0.0015	0.0178968
ENSSSCT00000032423	ENSSSCG00000024428	CHRNA9	chr8:33109938-33123280	1.22185	2.40094	-0.97454	0.00415	0.0383737	1.36683	2.40094	-0.812764	0.015	0.0967253
ENSSSCT00000002142	ENSSSCG00000001913	STOML1	chr7:64073606-64082630	7.13685	2.393	1.57647	5e-05	0.00119245	7.08023	2.393	1.56498	5e-05	0.00119245
ENSSSCT00000018677	ENSSSCG00000017154	CARD14	chr12:2199580-2250625	5.55948	2.3911	1.21728	5e-05	0.00119245	5.57087	2.3911	1.22023	5e-05	0.00119245
ENSSSCT00000006434	ENSSSCG00000005855	EXD3	chr1:314032463-314078885	4.14859	2.35376	0.81765	0.002	0.0222139	3.96102	2.35376	0.750903	0.00395	0.0370382
ENSSSCT00000002963	ENSSSCG00000002672	TLDC1	chr6:4628146-4649590	3.80874	2.35021	0.696521	0.02295	0.130533	4.05599	2.35021	0.787264	0.0107	0.0757871
ENSSSCT00000027662	ENSSSCG00000028090	DUSP23	chr4:98692815-98719165	3.96046	2.32774	0.766741	0.02205	0.126961	3.61036	2.32774	0.633217	0.05625	0.239027
ENSSSCT00000008730	ENSSSCG00000007967	ZNF213	chr3:40461243-40465155	5.09637	2.30804	1.1428	0.0001	0.00214362	4.86159	2.30804	1.07476	0.0002	0.003754
ENSSSCT00000017701	ENSSSCG00000016256	SPHKAP	chr15:143190623-143341643	1.29741	2.30782	-0.830902	0.00095	0.0127118	2.03363	2.30782	-0.182474	0.4525	0.781152
ENSSSCT00000015728	ENSSSCG00000014391	ARAP3	chr2:149506499-149530200	3.52099	2.29852	0.615276	0.00705	0.0562059	3.52492	2.29852	0.616887	0.00645	0.0527433
ENSSSCT00000026982	ENSSSCG00000030379	YPEL1	chr14:53652871-53656514	7.01604	2.29145	1.6144	0.00955	0.0700293	5.45685	2.29145	1.25181	0.0366	0.17983
ENSSSCT00000004421	ENSSSCG00000003998	ZNF274	chr6:57502681-57527735	4.35945	2.2871	0.930625	0.0012	0.0151808	5.43435	2.2871	1.24859	5e-05	0.00119245
ENSSSCT00000027481	ENSSSCG00000029626	NECAB3	chr17:42101647-42116081	4.42251	2.27775	0.957253	0.01005	0.0724749	4.92652	2.27775	1.11296	0.0033	0.0324458
ENSSSCT00000002714	ENSSSCG00000002444	FBLN5	chr7:120031684-120114530	4.57211	2.277	1.00573	0.0003	0.00520502	3.56714	2.277	0.647636	0.0208	0.121824
ENSSSCT00000002070	ENSSSCG00000001847	MESP1	chr7:60210864-60212402	5.95431	2.26424	1.39491	5e-05	0.00119245	7.3833	2.26424	1.70524	5e-05	0.00119245
ENSSSCT00000015138	ENSSSCG00000013859	C19orf44	chr2:60666524-60732451	1.31169	2.25645	-0.782624	0.0112	0.0783229	1.34302	2.25645	-0.74857	0.01415	0.0926446
ENSSSCT00000000253	ENSSSCG00000000234	GRASP	chr5:17945517-17953517	4.01	2.24268	0.838375	0.0025	0.0262156	4.40985	2.24268	0.975501	0.0005	0.00778241
ENSSSCT00000005853	ENSSSCG00000005315	CA9	chr1:264119360-264126033	3.97519	2.23798	0.828824	0.00875	0.0656296	4.69641	2.23798	1.06936	0.0011	0.0142222
ENSSSCT00000005413	ENSSSCG00000004907	CCBE1	chr1:178905033-179129728	3.97093	2.22997	0.832455	0.00485	0.0429592	4.37313	2.22997	0.971644	0.00145	0.017463
ENSSSCT00000032483	ENSSSCG00000024024	CX3CR1	chr13:26204855-26217959	1.11819	2.21901	-0.98875	0.0021	0.0230209	1.03937	2.21901	-1.09421	0.00095	0.0127118
ENSSSCT00000023828	ENSSSCG00000023485	PCDHGB5	chr2:149236975-149239923	1.02605	2.21894	-1.11276	0.00075	0.0106787	1.18928	2.21894	-0.899778	0.0043	0.0393907
ENSSSCT00000035901	ENSSSCG00000004485	CD109	chr1:103132169-103292068	4.26522	2.21647	0.944354	0.0011	0.0142222	3.37189	2.21647	0.605293	0.0333	0.16872
ENSSSCT00000026185	ENSSSCG00000024750	GFOD2	JH118995.1:474-13165	5.26633	2.20315	1.25723	5e-05	0.00119245	5.24886	2.20315	1.25244	5e-05	0.00119245
ENSSSCT00000007187	ENSSSCG00000006560	CREB3L4	chr4:104617838-104624254	4.47286	2.19885	1.02445	0.0007	0.010104	5.24055	2.19885	1.25297	5e-05	0.00119245
ENSSSCT00000010638	ENSSSCG00000009703	HAND2	chr14:17528446-17531529	3.55153	2.19694	0.692947	0.02785	0.149324	3.38711	2.19694	0.624561	0.04405	0.203555
ENSSSCT00000023623	ENSSSCG00000024827	ABTB1	chr13:80092323-80097094	4.50977	2.1969	1.03759	0.00105	0.0137227	5.1366	2.1969	1.22535	0.0001	0.00214362
ENSSSCT00000000229	ENSSSCG00000000214	GPD1	chr5:16324774-16334508	7.34941	2.19611	1.74268	0.00645	0.0527433	10.7468	2.19611	2.29088	0.0008	0.0111573
ENSSSCT00000009557	ENSSSCG00000008737	C1QTNF7	chr8:10369561-10376663	4.61678	2.17995	1.08259	0.0014	0.0169856	2.8215	2.17995	0.372168	0.2693	0.609691
ENSSSCT00000019484	ENSSSCG00000017904	ENO3	chr12:54023316-54028701	6.35254	2.17748	1.54467	5e-05	0.00119245	5.35534	2.17748	1.29832	5e-05	0.00119245
ENSSSCT00000026906	ENSSSCG00000022936	FIZ1	chr6:54505637-54508830	4.91673	2.16335	1.18443	0.00025	0.00449095	4.75524	2.16335	1.13625	0.0004	0.00655605
ENSSSCT00000018903	ENSSSCG00000017364	C17orf53	chr12:19339642-19346135	1.25838	2.13118	-0.760081	0.02295	0.130533	1.36551	2.13118	-0.642218	0.05395	0.232794
ENSSSCT00000012175	ENSSSCG00000011125	GATA3	chr10:69581079-69601347	1.1807	2.11282	-0.839525	0.0036	0.0345772	0.841711	2.11282	-1.32778	5e-05	0.00119245
ENSSSCT00000027299	ENSSSCG00000028126	MPPE1	chr6:90704266-90714316	3.76261	2.10762	0.836117	0.002	0.0222139	4.295	2.10762	1.02704	0.00015	0.00297337
ENSSSCT00000013108	ENSSSCG00000011979	GPR15	chr13:170577769-170578846	4.57378	2.10045	1.12269	0.00105	0.0137227	3.00714	2.10045	0.517696	0.1371	0.419662
ENSSSCT00000006038	ENSSSCG00000005492	TMEM268	chr1:286220698-286241331	3.31502	2.09866	0.659552	0.01985	0.117933	3.97963	2.09866	0.923169	0.00125	0.015631
ENSSSCT00000014931	ENSSSCG00000013667	COL5A3	chr2:69156852-69193845	3.65653	2.09105	0.806246	0.00035	0.0058827	4.14296	2.09105	0.986433	5e-05	0.00119245
ENSSSCT00000025245	ENSSSCG00000022310	VPS9D1	chr6:440203-451813	3.50551	2.08725	0.748022	0.0026	0.0269681	3.2072	2.08725	0.619714	0.01385	0.0912218
ENSSSCT00000014806	ENSSSCG00000013556	ADGRE1	chr2:72699547-72739564	1.06749	2.07445	-0.958508	0.0081	0.062101	0.743438	2.07445	-1.48045	0.00015	0.00297337
ENSSSCT00000012432	ENSSSCG00000011355	COL7A1	chr13:34507196-34539117	3.77924	2.06289	0.873426	0.00015	0.00297337	4.36881	2.06289	1.08257	5e-05	0.00119245
ENSSSCT00000008790	ENSSSCG00000008021	TMEM204	chr3:41772604-41834839	5.06116	2.05058	1.30344	0.0017	0.0196705	5.95825	2.05058	1.53886	0.00015	0.00297337
ENSSSCT00000002262	ENSSSCG00000002022	BCL2L2	chr7:80971089-80972334	5.16262	2.02828	1.34785	0.0035	0.0339068	4.90631	2.02828	1.27438	0.0056	0.0476499
ENSSSCT00000015205	ENSSSCG00000013919	HOMER3	chr2:58714583-58721466	3.43897	2.02792	0.761981	0.0136	0.0901132	2.72604	2.02792	0.426812	0.1764	0.486145
ENSSSCT00000014776	ENSSSCG00000013529	NRTN	chr2:73638787-73639207	6.83051	2.02738	1.75238	0.00505	0.0442407	5.8638	2.02738	1.53222	0.012	0.0822103
ENSSSCT00000004369	ENSSSCG00000003950	TIE1	chr6:155288382-155321728	3.39645	2.01055	0.756441	0.00345	0.0335647	3.55598	2.01055	0.822661	0.00175	0.0201145
ENSSSCT00000030979	ENSSSCG00000029592	GPRC5A	GL896435.1:4687-9401	1.14858	2.009	-0.806622	0.019	0.114499	1.65549	2.009	-0.279217	0.3974	0.737762
ENSSSCT00000033158	ENSSSCG00000012823	DKC1	chrX:143254268-143264309	13.8048	2.00896	2.78065	0.00865	0.0651238	11.7146	2.00896	2.54379	0.0118	0.0813015
ENSSSCT00000025114	ENSSSCG00000022575	PRMT2	GL896201.1:783-23014	4.60673	2.00784	1.1981	0.00215	0.0234086	6.22955	2.00784	1.63348	5e-05	0.00119245
ENSSSCT00000008718	ENSSSCG00000007955	CLUAP1	chr3:40002953-40022546	3.60208	1.99997	0.848856	0.01405	0.0921785	3.41516	1.99997	0.771977	0.0238	0.13381
ENSSSCT00000026602	ENSSSCG00000022448	CLNK	GL896531.2:187336-248846	1.10947	1.99154	-0.844011	0.0481	0.215606	0.693131	1.99154	-1.52269	0.07375	0.284262
ENSSSCT00000006416	ENSSSCG00000005837	FAM69B	chr1:313854922-313859160	5.37086	1.98631	1.43507	5e-05	0.00119245	4.62032	1.98631	1.21791	0.0003	0.00520502
ENSSSCT00000003988	ENSSSCG00000003593	NKAIN1	chr6:81479840-81487848	1.30775	1.98552	-0.602432	0.04455	0.204904	1.82737	1.98552	-0.11975	0.6816	0.911807
ENSSSCT00000005664	ENSSSCG00000005136	IFNE	chr1:224421237-224421819	4.69189	1.97283	1.2499	0.0106	0.0753541	5.50259	1.97283	1.47984	0.003	0.0300926
ENSSSCT00000010417	ENSSSCG00000009500	CLDN10	chr11:71983267-72006790	3.85479	1.96781	0.970058	0.0058	0.0488708	2.8898	1.96781	0.554375	0.12445	0.396119
ENSSSCT00000018646	ENSSSCG00000017128	HEXDC	chr12:63400-75003	4.58973	1.95585	1.23062	0.00025	0.00449095	4.08723	1.95585	1.06333	0.0011	0.0142222
ENSSSCT00000015692	ENSSSCG00000014362	HBEGF	chr2:148046705-148058378	1.1719	1.94892	-0.73383	0.04285	0.199785	0.935884	1.94892	-1.05828	0.00845	0.0640856
ENSSSCT00000014821	ENSSSCG00000013569	PEX11G	chr2:72166844-72175445	5.15635	1.94882	1.40375	5e-05	0.00119245	4.97855	1.94882	1.35313	5e-05	0.00119245
ENSSSCT00000023773	ENSSSCG00000022151	B3GALT6	chr6:57997152-57998124	4.45579	1.93723	1.20168	0.00115	0.01472	5.92792	1.93723	1.61353	0.0001	0.00214362
ENSSSCT00000014999	ENSSSCG00000013725	FBXW9	chr2:66670439-66676405	3.05353	1.93571	0.657618	0.032	0.164174	2.96062	1.93571	0.613042	0.04555	0.207845
ENSSSCT00000036192	ENSSSCG00000012689	ZNF75D	chrX:126789926-126840738	6.96819	1.93156	1.85102	0.0477	0.214519	6.28483	1.93156	1.70211	0.06145	0.253025
ENSSSCT00000002973	ENSSSCG00000002680	TAF1C	chr6:5032853-5038264	3.13383	1.9314	0.698278	0.00985	0.0716055	3.83831	1.9314	0.99082	0.00035	0.0058827
ENSSSCT00000000809	ENSSSCG00000000745	DDX11	chr5:69616394-69629666	3.56787	1.92737	0.888426	0.00125	0.015631	3.75906	1.92737	0.963736	0.00035	0.0058827
ENSSSCT00000023141	ENSSSCG00000027854	HSD17B6	chr5:23775888-23798121	7.49498	1.92656	1.9599	5e-05	0.00119245	7.51656	1.92656	1.96404	5e-05	0.00119245
ENSSSCT00000013797	ENSSSCG00000012618	SOWAHD	chrX:113453593-113455236	4.27975	1.92463	1.15295	0.00045	0.00719494	6.02318	1.92463	1.64594	5e-05	0.00119245
ENSSSCT00000002041	ENSSSCG00000001822	RCCD1	chr7:58578281-58587684	3.69502	1.92248	0.942616	0.00255	0.0266091	3.53691	1.92248	0.879521	0.00485	0.0429592
ENSSSCT00000024996	ENSSSCG00000004622	GNB5	chr1:132632470-132679845	3.44494	1.91547	0.846777	0.00075	0.0106787	3.16786	1.91547	0.725807	0.0058	0.0488708
ENSSSCT00000018166	ENSSSCG00000016685	WIPF3	chr18:47397850-47441699	1.02006	1.91463	-0.908412	0.03325	0.1686	1.14722	1.91463	-0.738927	0.075	0.287332
ENSSSCT00000017896	ENSSSCG00000016435	SMARCD3	chr18:6276686-6286254	4.82324	1.91011	1.33635	5e-05	0.00119245	3.77585	1.91011	0.983149	0.0012	0.0151808
ENSSSCT00000009512	ENSSSCG00000008694	GRK4	chr8:1370472-1444437	3.49164	1.87142	0.899772	0.004	0.0373974	3.04563	1.87142	0.702605	0.0216	0.12509
ENSSSCT00000004121	ENSSSCG00000003721	CHST9	chr6:104448290-104558275	3.2264	1.86365	0.791796	0.0043	0.0393907	3.4484	1.86365	0.887799	0.00135	0.0165389
ENSSSCT00000003226	ENSSSCG00000002921	CLIP3	chr6:40793321-40807157	1.21301	1.86031	-0.616952	0.04975	0.220882	1.11423	1.86031	-0.739501	0.01855	0.112807
ENSSSCT00000014502	ENSSSCG00000013278	TSPAN18	chr2:19002629-19021138	3.90595	1.85653	1.07306	0.0129	0.0866778	3.97129	1.85653	1.097	0.01135	0.0791125
ENSSSCT00000023512	ENSSSCG00000030139	SDCCAG3	GL896489.1:8140-13981	2.94988	1.85421	0.669846	0.02185	0.126025	3.08836	1.85421	0.736032	0.013	0.0871757
ENSSSCT00000000830	ENSSSCG00000000766	CECR2	chr5:71997706-72013639	1.12699	1.84589	-0.711839	0.01405	0.0921785	0.922752	1.84589	-1.0003	0.0008	0.0111573
ENSSSCT00000004011	ENSSSCG00000003616	FAM167B	chr6:82690528-82692173	5.79054	1.84516	1.64995	5e-05	0.00119245	7.11041	1.84516	1.94618	5e-05	0.00119245
ENSSSCT00000036003	ENSSSCG00000009283	TNFRSF19	chr11:1860877-1955969	1.1772	1.83441	-0.639959	0.03705	0.181345	1.49564	1.83441	-0.294551	0.3021	0.64737
ENSSSCT00000027305	ENSSSCG00000025588	FJX1	chr2:27784533-27785847	3.24981	1.82782	0.830228	0.01325	0.0884628	2.59544	1.82782	0.505852	0.1188	0.385069
ENSSSCT00000007599	ENSSSCG00000006936	ODF2L	chr4:142246489-142276543	3.90713	1.82656	1.09698	0.00025	0.00449095	2.36094	1.82656	0.37023	0.21705	0.546099
ENSSSCT00000007003	ENSSSCG00000006390	CASQ1	chr4:98218158-98228804	1.10024	1.82505	-0.730116	0.04055	0.192612	0.839011	1.82505	-1.12118	0.00235	0.0250032
ENSSSCT00000017223	ENSSSCG00000015815	FGFR1	chr15:55215592-55269381	3.73792	1.81799	1.03989	0.0475	0.213905	3.84521	1.81799	1.08072	0.0433	0.201062
ENSSSCT00000018932	ENSSSCG00000017392	CCR10	chr12:20376604-20378599	3.02141	1.78276	0.761109	0.0305	0.158719	2.79917	1.78276	0.650891	0.07175	0.279534
ENSSSCT00000014564	ENSSSCG00000013336	CCDC34	chr2:35619280-35656363	5.39848	1.78019	1.60053	0.00035	0.0058827	4.6138	1.78019	1.37393	0.00245	0.025797
ENSSSCT00000032105	ENSSSCG00000026722	PHF14	chr9:88596343-88786396	5.87582	1.77687	1.72545	0.02365	0.133259	5.54617	1.77687	1.64215	0.0282	0.150608
ENSSSCT00000014073	ENSSSCG00000012875	TPCN2	chr2:2708674-2727191	3.36845	1.76539	0.932099	0.0001	0.00214362	3.53536	1.76539	1.00187	5e-05	0.00119245
ENSSSCT00000015144	ENSSSCG00000013864	TMEM38A	chr2:60517861-60530410	3.0077	1.76113	0.772157	0.0077	0.0597357	2.84699	1.76113	0.692938	0.0185	0.11261
ENSSSCT00000015199	ENSSSCG00000013913	KLHL26	chr2:58921327-58925265	3.08185	1.74804	0.818059	0.00915	0.0678504	3.3976	1.74804	0.958777	0.0024	0.0254043
ENSSSCT00000019168	ENSSSCG00000017607	TMEM100	chr12:32675129-32678191	2.99978	1.74682	0.780126	0.0165	0.103773	3.72109	1.74682	1.09099	0.0011	0.0142222
ENSSSCT00000014699	ENSSSCG00000013455	IZUMO4	chr2:77007220-77009958	3.59118	1.74395	1.0421	0.01715	0.106666	2.5774	1.74395	0.56356	0.19015	0.506837
ENSSSCT00000024140	ENSSSCG00000025335	ZSCAN31	chr7:24117438-24120600	2.64071	1.74113	0.600904	0.0297	0.156027	2.41559	1.74113	0.472358	0.0861	0.314636
ENSSSCT00000018110	ENSSSCG00000016633	MET	chr18:31617219-31693966	3.84354	1.73614	1.14655	0.01155	0.0800964	4.45985	1.73614	1.36111	0.00395	0.0370382
ENSSSCT00000011956	ENSSSCG00000010925	PPP1R12B	chr10:28860828-28971691	2.61419	1.72353	0.600997	0.031	0.16055	2.54167	1.72353	0.560409	0.04245	0.198455
ENSSSCT00000017328	ENSSSCG00000015914	SCN7A	chr15:81528776-81569418	2.6557	1.72344	0.623798	0.01585	0.100774	2.07985	1.72344	0.271186	0.312	0.657487
ENSSSCT00000023484	ENSSSCG00000023888	GPX7	GL895158.1:8213-10603	3.44092	1.72192	0.998772	0.04595	0.209118	3.53646	1.72192	1.03829	0.0376	0.183098
ENSSSCT00000025524	ENSSSCG00000022364	CPT1B	GL894016.1:26816-31912	3.6261	1.71428	1.08081	0.0011	0.0142222	3.43234	1.71428	1.00159	0.00265	0.0273669
ENSSSCT00000027090	ENSSSCG00000030065	ZBTB47	chr13:28849389-28864853	2.81362	1.7103	0.718179	0.00455	0.0409193	2.39772	1.7103	0.487412	0.0542	0.233542
ENSSSCT00000015165	ENSSSCG00000013879	SLC27A1	chr2:59752657-59767677	3.6822	1.7058	1.11011	0.0009	0.0122346	3.81541	1.7058	1.16138	0.00065	0.00953497
ENSSSCT00000022965	ENSSSCG00000022302	GLTSCR1	chr6:48928610-48946950	1.11591	1.69855	-0.606076	0.03305	0.167906	1.20344	1.69855	-0.497133	0.0821	0.305391
ENSSSCT00000001713	ENSSSCG00000001538	DEF6	chr7:36220768-36243212	3.75793	1.69183	1.15135	0.01115	0.0780671	4.10935	1.69183	1.28032	0.008	0.0615186
ENSSSCT00000017271	ENSSSCG00000015860	SFT2D3	chr15:66385195-66385855	4.80379	1.69049	1.50673	0.0015	0.0178968	7.15372	1.69049	2.08126	5e-05	0.00119245
ENSSSCT00000002709	ENSSSCG00000002439	GPR68	chr7:119459361-119460480	2.75245	1.67628	0.71545	0.03915	0.188084	1.94535	1.67628	0.214762	0.5668	0.85558
ENSSSCT00000004796	ENSSSCG00000004340	FHL5	chr1:72074767-72120937	2.86602	1.67043	0.778827	0.03275	0.166832	3.38229	1.67043	1.01778	0.0043	0.0393907
ENSSSCT00000005243	ENSSSCG00000004744	TYRO3	chr1:144883342-144900900	3.60572	1.66315	1.11636	5e-05	0.00119245	4.14365	1.66315	1.31698	5e-05	0.00119245
ENSSSCT00000031892	ENSSSCG00000026141	ZNF71	chr6:56148962-56159821	2.59361	1.64553	0.656413	0.01355	0.0898377	2.73894	1.64553	0.735069	0.0057	0.0482378
ENSSSCT00000026736	ENSSSCG00000027847	METTL12	chr2:8428466-8429350	3.74764	1.63411	1.19748	0.00875	0.0656296	5.53809	1.63411	1.76088	0.0006	0.00895758
ENSSSCT00000025301	ENSSSCG00000028723	CCDC102A	chr6:17426722-17447550	2.87274	1.63025	0.817335	0.0029	0.0293426	2.22743	1.63025	0.450286	0.10565	0.357816
ENSSSCT00000017875	ENSSSCG00000016416	SHH	chr18:2664793-2673751	3.05424	1.61704	0.917462	0.01105	0.0775791	3.01658	1.61704	0.899562	0.0106	0.0753541
ENSSSCT00000013933	ENSSSCG00000012744	CD99L2	chrX:140071620-140150976	2.94627	1.60029	0.880554	0.00625	0.0515691	2.74873	1.60029	0.78043	0.0149	0.0962356
ENSSSCT00000002799	ENSSSCG00000002520	SLC25A29	chr7:128642763-128656947	3.9689	1.59574	1.31451	5e-05	0.00119245	3.91301	1.59574	1.29406	5e-05	0.00119245
ENSSSCT00000012457	ENSSSCG00000011379	KLHDC8B	chr13:35007411-35011175	3.12203	1.57369	0.988331	0.0013	0.0160896	2.48718	1.57369	0.660358	0.032	0.164174
ENSSSCT00000014852	ENSSSCG00000013598	KANK3	chr2:71305327-71320252	2.95364	1.54436	0.935482	0.00145	0.017463	3.48898	1.54436	1.1758	5e-05	0.00119245
ENSSSCT00000015979	ENSSSCG00000014628	APBB1	chr9:3964668-3977751	2.74897	1.54242	0.833692	0.0033	0.0324458	2.80907	1.54242	0.864894	0.00175	0.0201145
ENSSSCT00000016229	ENSSSCG00000014876	MYO7A	chr9:12345555-12430927	3.16281	1.52861	1.04899	5e-05	0.00119245	2.86482	1.52861	0.906225	0.0001	0.00214362
ENSSSCT00000017405	ENSSSCG00000015984	HOXD4	chr15:91420235-91421548	3.53589	1.52442	1.21382	0.00595	0.0497612	3.64158	1.52442	1.25631	0.00475	0.0422547
ENSSSCT00000013185	ENSSSCG00000012053	CBR3	chr13:209842575-209852620	2.49417	1.51736	0.717002	0.03515	0.174718	2.44729	1.51736	0.689623	0.04455	0.204904
ENSSSCT00000017833	ENSSSCG00000016378	PASK	chr15:155006591-155028697	2.98787	1.50979	0.984763	0.0001	0.00214362	3.51536	1.50979	1.21932	5e-05	0.00119245
ENSSSCT00000010988	ENSSSCG00000010031	SFI1	chr14:51447742-51540656	2.60903	1.50582	0.792963	0.0033	0.0324458	3.13893	1.50582	1.05972	5e-05	0.00119245
ENSSSCT00000023627	ENSSSCG00000028052	OBSL1	chr15:134512276-134533002	2.41182	1.50123	0.683975	0.0037	0.0352729	2.75668	1.50123	0.876782	0.0002	0.003754
ENSSSCT00000015696	ENSSSCG00000014366	APBB3	chr2:148258218-148264237	3.25806	1.48937	1.12931	0.00135	0.0165389	4.07716	1.48937	1.45286	5e-05	0.00119245
ENSSSCT00000000870	ENSSSCG00000000802	NELL2	chr5:78417881-78687030	2.21966	1.45841	0.605945	0.04125	0.194679	1.93257	1.45841	0.406127	0.16715	0.471642
ENSSSCT00000003164	ENSSSCG00000002863	LRP3	chr6:38565865-38578848	2.66104	1.45538	0.870589	0.0035	0.0339068	2.55003	1.45538	0.809114	0.00565	0.0479669
ENSSSCT00000007200	ENSSSCG00000006572	NPR1	chr4:104855491-104870669	3.15881	1.44943	1.1239	0.00015	0.00297337	3.45458	1.44943	1.25303	5e-05	0.00119245
ENSSSCT00000033097	ENSSSCG00000012591	AMOT	chrX:106946507-107012675	3.46305	1.44875	1.25724	0.0172	0.106862	3.21515	1.44875	1.15008	0.0266	0.14445
ENSSSCT00000001073	ENSSSCG00000000983	IL17REL	chr5:110908365-110919494	2.50342	1.44229	0.795533	0.03725	0.182087	2.95461	1.44229	1.0346	0.00715	0.0567486
ENSSSCT00000002135	ENSSSCG00000001906	CYP1A1	chr7:63491453-63497651	3.53597	1.42322	1.31295	0.00055	0.00838524	8.99106	1.42322	2.65933	5e-05	0.00119245
ENSSSCT00000028285	ENSSSCG00000021495	C3orf33	chr13:103681268-103696666	2.65118	1.40869	0.91228	0.00545	0.0467215	1.87336	1.40869	0.411277	0.2384	0.574147
ENSSSCT00000030089	ENSSSCG00000017816	RILP	chr12:49742021-49745997	2.40475	1.40715	0.773109	0.0432	0.200802	2.16551	1.40715	0.62193	0.10345	0.352925
ENSSSCT00000013441	ENSSSCG00000012292	SYP	chrX:48080131-48094633	2.60905	1.40055	0.897526	0.0126	0.0852168	2.88061	1.40055	1.04038	0.00525	0.045513
ENSSSCT00000013746	ENSSSCG00000012571	COL4A6	chrX:103072683-103136037	2.73623	1.39026	0.976837	5e-05	0.00119245	3.10026	1.39026	1.15704	5e-05	0.00119245
ENSSSCT00000024540	ENSSSCG00000020873	SYNGR1	chr5:6165046-6174569	2.65082	1.38312	0.938512	0.00035	0.0058827	2.74879	1.38312	0.990869	5e-05	0.00119245
ENSSSCT00000016619	ENSSSCG00000015250	ADAMTS15	chr9:63398129-63422854	2.13233	1.3745	0.633526	0.01135	0.0791125	3.50172	1.3745	1.34916	5e-05	0.00119245
ENSSSCT00000031921	ENSSSCG00000028995	TLE2	chr2:75960119-76057180	2.1263	1.36641	0.637951	0.036	0.177659	2.07471	1.36641	0.602514	0.04695	0.212235
ENSSSCT00000007877	ENSSSCG00000007198	ANGPT4	chr17:39069491-39114089	2.44379	1.3655	0.839689	0.00635	0.0521455	2.69045	1.3655	0.978418	0.0021	0.0230209
ENSSSCT00000002222	ENSSSCG00000001986	NFATC4	chr7:80189871-80200311	2.25621	1.36021	0.730068	0.00845	0.0640856	1.96796	1.36021	0.532868	0.05905	0.2462
ENSSSCT00000011413	ENSSSCG00000010428	DKK1	chr14:106114970-106117673	2.23036	1.3325	0.743146	0.0469	0.212084	1.74424	1.3325	0.388466	0.32495	0.670209
ENSSSCT00000030634	ENSSSCG00000024967	C7orf61	chr3:7635316-7638176	2.67687	1.33223	1.0067	0.0432	0.200802	3.29998	1.33223	1.30861	0.01015	0.0730396
ENSSSCT00000023724	ENSSSCG00000022280	DACT3	chr6:47861775-47874977	4.46	1.32556	1.75044	0.0015	0.0178968	3.81856	1.32556	1.52643	0.00375	0.0356116
ENSSSCT00000031960	ENSSSCG00000020647	PAOX	JH118992.1:206-6130	2.17404	1.31926	0.72065	0.0304	0.158391	2.18285	1.31926	0.726487	0.02895	0.153448
ENSSSCT00000008701	ENSSSCG00000007939	ANKS3	chr3:38730149-38751123	1.99369	1.31303	0.602534	0.04475	0.205528	2.25187	1.31303	0.778221	0.011	0.0773554
ENSSSCT00000032697	ENSSSCG00000001391	CCHCR1	chr7:27275963-27289736	4.33301	1.30532	1.73097	0.0238	0.13381	3.94372	1.30532	1.59516	0.0315	0.162221
ENSSSCT00000028261	ENSSSCG00000024311	CCR2	chr13:32532564-32538394	2.42669	1.29589	0.905047	0.0037	0.0352729	2.25691	1.29589	0.800411	0.0096	0.0702912
ENSSSCT00000000769	ENSSSCG00000000707	SCNN1A	chr5:66749071-66773949	2.50402	1.29449	0.951857	0.00415	0.0383737	4.58751	1.29449	1.82532	5e-05	0.00119245
ENSSSCT00000018372	ENSSSCG00000016868	ANXA2R	chr16:29290646-29291186	2.8647	1.26578	1.17835	0.0432	0.200802	2.92983	1.26578	1.21078	0.0385	0.186093
ENSSSCT00000019496	ENSSSCG00000017914	GLTPD2	chr12:54324903-54326943	2.95453	1.25609	1.23398	0.00135	0.0165389	3.92749	1.25609	1.64466	0.00015	0.00297337
ENSSSCT00000028933	ENSSSCG00000027486	TRIP6	chr3:8140289-8143649	3.09443	1.25282	1.30449	0.00025	0.00449095	3.36765	1.25282	1.42656	0.0001	0.00214362
ENSSSCT00000000280	ENSSSCG00000000261	IGFBP6	chr5:18768001-18772057	2.73244	1.24987	1.12841	0.0036	0.0345772	2.92124	1.24987	1.2248	0.0017	0.0196705
ENSSSCT00000014799	ENSSSCG00000013550	SLC25A23	chr2:72958831-72965057	3.75286	1.23225	1.60669	0.00025	0.00449095	3.90853	1.23225	1.66533	0.0002	0.003754
ENSSSCT00000025158	ENSSSCG00000030303	ACHE	chr3:8159349-8163719	2.0852	1.22148	0.771553	0.01575	0.100248	2.24792	1.22148	0.87996	0.0059	0.0494723
ENSSSCT00000007393	ENSSSCG00000006748	TSPAN2	chr4:115641712-115680720	3.16157	1.2061	1.3903	5e-05	0.00119245	2.50366	1.2061	1.0537	0.0019	0.0214646
ENSSSCT00000018990	ENSSSCG00000017444	KRT15	chr12:21489161-21494348	2.68927	1.20607	1.1569	0.0045	0.0405666	1.88498	1.20607	0.64423	0.11185	0.370481
ENSSSCT00000018517	ENSSSCG00000017005	KCNMB1	chr16:57959703-57971192	5.72574	1.19529	2.2601	5e-05	0.00119245	3.44101	1.19529	1.52547	0.002	0.0222139
ENSSSCT00000006821	ENSSSCG00000006225	TTPA	chr4:77238390-77258995	2.19659	1.19077	0.883375	0.04465	0.205246	2.52968	1.19077	1.08706	0.0142	0.092896
ENSSSCT00000014529	ENSSSCG00000013303	ABTB2	chr2:28946534-29149593	1.84362	1.18955	0.632117	0.01385	0.0912218	2.7607	1.18955	1.21461	5e-05	0.00119245
ENSSSCT00000012401	ENSSSCG00000011326	PTH1R	chr13:32998083-33023636	2.21651	1.1788	0.910973	0.0054	0.0464359	2.34628	1.1788	0.993063	0.00315	0.0312883
ENSSSCT00000016264	ENSSSCG00000014908	CCDC89	chr9:21877983-21879105	2.05181	1.16919	0.811385	0.0416	0.195912	1.85925	1.16919	0.669208	0.10005	0.345582
ENSSSCT00000003795	ENSSSCG00000003421	FBXO44	chr6:65666670-65673480	2.32409	1.15431	1.00964	0.0026	0.0269681	2.88635	1.15431	1.32222	0.0003	0.00520502
ENSSSCT00000012364	ENSSSCG00000011294	FAM198A	chr13:29168962-29181610	2.27345	1.14693	0.987102	0.0023	0.0246104	2.00165	1.14693	0.803411	0.0141	0.0924402
ENSSSCT00000017353	ENSSSCG00000015937	KLHL23	chr15:85149171-85169855	2.61564	1.14026	1.1978	0.00045	0.00719494	2.05468	1.14026	0.849553	0.00825	0.0629718
ENSSSCT00000013709	ENSSSCG00000012540	SLC25A53	chrX:98822340-98823261	2.81059	1.13677	1.30594	0.00415	0.0383737	2.88217	1.13677	1.34222	0.00325	0.0320922
ENSSSCT00000022463	ENSSSCG00000029900	DMPK	GL896302.1:110787-119908	6.61625	1.1284	2.55173	5e-05	0.00119245	4.85732	1.1284	2.10588	5e-05	0.00119245
ENSSSCT00000000030	ENSSSCG00000000029	SCUBE1	chr5:3050692-3114315	1.79406	1.12419	0.674351	0.0091	0.067605	1.86627	1.12419	0.731273	0.00455	0.0409193
ENSSSCT00000016899	ENSSSCG00000015512	PAPPA2	chr9:130015439-130283638	1.72597	1.12307	0.619957	0.0202	0.119425	1.89522	1.12307	0.754918	0.00525	0.045513
ENSSSCT00000007004	ENSSSCG00000006391	ATP1A2	chr4:98284935-98312300	3.08797	1.11024	1.47579	5e-05	0.00119245	2.87521	1.11024	1.3728	5e-05	0.00119245
ENSSSCT00000019122	ENSSSCG00000017567	RSAD1	chr12:26844337-26853049	1.98764	1.10373	0.848673	0.0118	0.0813015	2.58002	1.10373	1.225	0.0005	0.00778241
ENSSSCT00000028562	ENSSSCG00000025268	CKM	GL896419.1:12572-20830	11.7261	1.07534	3.44686	5e-05	0.00119245	6.76117	1.07534	2.65248	5e-05	0.00119245
ENSSSCT00000032025	ENSSSCG00000029796	KBTBD11	chr15:38048837-38050850	4.55139	1.06587	2.09428	0.04555	0.207845	5.50929	1.06587	2.36984	0.03465	0.17308
ENSSSCT00000007974	ENSSSCG00000007288	MYH7B	chr17:43559552-43582499	1.63109	1.06394	0.616419	0.0154	0.0986485	1.54956	1.06394	0.542443	0.0328	0.166993
ENSSSCT00000033120	ENSSSCG00000022372	SLC6A14	chrX:110086480-110131652	3.89997	1.05868	1.8812	0.00015	0.00297337	2.56975	1.05868	1.27936	0.00645	0.0527433
ENSSSCT00000003746	ENSSSCG00000003376	PLEKHG5	chr6:62274253-62285381	1.74545	1.05834	0.721791	0.00765	0.0594848	2.04297	1.05834	0.948861	0.0002	0.003754
ENSSSCT00000006422	ENSSSCG00000005843	LCN15	chr1:313868762-313870923	9.26791	1.05641	3.13308	0.0005	0.00778241	8.81815	1.05641	3.06131	0.0006	0.00895758
ENSSSCT00000028658	ENSSSCG00000022630	FLYWCH2	chr3:40683843-40693545	2.62428	1.05313	1.31724	0.0037	0.0352729	2.15563	1.05313	1.03344	0.0197	0.117358
ENSSSCT00000036112	ENSSSCG00000008003	HAGHL	chr3:41424153-41428259	2.61394	1.05184	1.31331	0.0246	0.136936	3.26488	1.05184	1.63411	0.00825	0.0629718
ENSSSCT00000029140	ENSSSCG00000029219	SH3BGR	chr13:213286139-213348206	4.04156	1.03707	1.96241	5e-05	0.00119245	3.23641	1.03707	1.64189	0.0001	0.00214362
ENSSSCT00000033612	ENSSSCG00000006581	S100A16	chr4:104961766-104968635	0.767172	27.9156	-5.18538	0.0314	0.161901	0.221527	27.9156	-6.97744	0.04105	0.194194
ENSSSCT00000023832	ENSSSCG00000017205	SAP30BP	chr12:5641608-5678650	0.226132	21.5331	-6.57325	0.0338	0.17035	1.53958	21.5331	-3.80595	0.0758	0.289116
ENSSSCT00000035424	ENSSSCG00000021576	CD83	chr7:10634534-10817827	0.000142692	17.9883	-16.9438	0.02415	0.13529	2.70449e-05	17.9883	-19.3433	0.0935	0.331383
ENSSSCT00000032764	ENSSSCG00000012257	MAOA	chrX:43132738-43209051	0.951994	15.0888	-3.98638	0.04805	0.215487	1.6875	15.0888	-3.16052	0.06245	0.255711
ENSSSCT00000034654	ENSSSCG00000012649	SMARCA1	chrX:121756239-121832582	0.242387	9.96238	-5.36111	0.04665	0.211282	0.23581	9.96238	-5.40079	0.0454	0.207516
ENSSSCT00000036079	ENSSSCG00000008193	ZAP70	chr3:59135457-59348054	0.398066	8.8812	-4.47968	0.0401	0.191098	0.00155796	8.8812	-12.4769	0.22355	0.55486
ENSSSCT00000035292	ENSSSCG00000010554	SCD	chr14:120964205-120980914	0.366945	7.93658	-4.43488	0.048	0.215339	0.117704	7.93658	-6.07528	0.0616	0.253381
ENSSSCT00000010610	ENSSSCG00000009676	ZNF395	chr14:13293541-13338587	0.00952963	7.55467	-9.63073	0.04645	0.210719	0.06853	7.55467	-6.78449	0.022	0.126753
ENSSSCT00000033605	ENSSSCG00000012329	PHF8	chrX:52130284-52306498	0.309687	7.41922	-4.58238	0.03925	0.188366	0.180237	7.41922	-5.3633	0.208	0.533546
ENSSSCT00000033863	ENSSSCG00000017125	FOXK2	chr12:121883-176867	0.202534	6.42723	-4.98796	0.02375	0.133623	0.0756375	6.42723	-6.40895	0.0675	0.269138
ENSSSCT00000034134	ENSSSCG00000006350	FCGR2B	chr4:96888985-96908203	0.195346	5.07561	-4.69948	0.03025	0.157906	0.107644	5.07561	-5.55924	0.0745	0.286119
ENSSSCT00000008861	ENSSSCG00000008088	IL1B1	chr3:45319295-45326307	0.556422	3.69107	-2.72979	5e-05	0.00119245	0.471694	3.69107	-2.96812	5e-05	0.00119245
ENSSSCT00000001526	ENSSSCG00000001398	SLA-6	chr7:27602781-27606824	4.95484e-05	3.32627	-16.0347	0.04025	0.191613	3.28482e-05	3.32627	-16.6277	0.0675	0.269138
ENSSSCT00000033700	ENSSSCG00000000648	CLEC7A	chr5:64542868-64556408	0.847108	3.19421	-1.91484	0.0001	0.00214362	0.687002	3.19421	-2.21707	0.0008	0.0111573
ENSSSCT00000034381	ENSSSCG00000001421	ZBTB12	chr7:27815045-27817497	0.531777	3.0733	-2.5309	0.04125	0.194679	1.07661	3.0733	-1.5133	0.05635	0.239325
ENSSSCT00000005400	ENSSSCG00000004894	SERPINB5	chr1:175646719-175666858	0.85295	2.95699	-1.7936	5e-05	0.00119245	1.03015	2.95699	-1.52127	5e-05	0.00119245
ENSSSCT00000008863	ENSSSCG00000008090	IL1A	chr3:45453544-45466239	0.997492	2.9188	-1.549	0.0001	0.00214362	0.699335	2.9188	-2.06132	5e-05	0.00119245
ENSSSCT00000017034	ENSSSCG00000015638	C1orf186	chr9:72984448-73007285	0.815614	2.91422	-1.83715	5e-05	0.00119245	0.574033	2.91422	-2.3439	5e-05	0.00119245
ENSSSCT00000016173	ENSSSCG00000014821	FAM168A	chr9:8523395-8533147	0.992482	2.82666	-1.50998	0.00135	0.0165389	0.937963	2.82666	-1.59149	0.0023	0.0246104
ENSSSCT00000026465	ENSSSCG00000025795	CSF3R	GL895950.1:27092-42362	0.812765	2.61712	-1.68707	5e-05	0.00119245	0.744737	2.61712	-1.81318	5e-05	0.00119245
ENSSSCT00000009594	ENSSSCG00000008769	CH242-305H5.1	chr8:29672294-29674595	0.385928	2.54687	-2.72232	5e-05	0.00119245	0.749017	2.54687	-1.76566	0.00045	0.00719494
ENSSSCT00000005129	ENSSSCG00000004644	HDC	chr1:135147966-135166937	0.661775	2.50834	-1.92232	5e-05	0.00119245	0.253649	2.50834	-3.30582	5e-05	0.00119245
ENSSSCT00000010067	ENSSSCG00000009194	HPGDS	chr8:134669307-134692062	0.818203	2.4267	-1.56846	0.01525	0.0979721	0.255437	2.4267	-3.24795	0.0066	0.0536545
ENSSSCT00000004643	ENSSSCG00000004202	SAMD3	chr1:36583231-36629478	0.991568	2.36667	-1.25508	0.0003	0.00520502	0.620679	2.36667	-1.93094	5e-05	0.00119245
ENSSSCT00000033967	ENSSSCG00000029231	PigE-108A11.6	chr6:53902903-53909080	0.941593	2.1842	-1.21393	0.0005	0.00778241	0.981034	2.1842	-1.15473	0.00125	0.015631
ENSSSCT00000025379	ENSSSCG00000024668	KLK1	chr6:51469506-51475249	0.868302	2.07647	-1.25786	0.0145	0.0943857	0.876674	2.07647	-1.24402	0.0145	0.0943857
ENSSSCT00000023695	ENSSSCG00000029400	RBP5	GL894246.2:47740-76238	2.3175	0.993876	1.22143	0.0026	0.0269681	1.96512	0.993876	0.983482	0.01245	0.0843986
ENSSSCT00000006419	ENSSSCG00000005840	C8G	chr1:313757726-313759194	7.9217	0.533545	3.89213	5e-05	0.00119245	3.48876	0.533545	2.70903	0.0001	0.00214362
ENSSSCT00000014778	ENSSSCG00000013531	VMAC	chr2:73683677-73685463	4.99083	0.891537	2.48491	0.0008	0.0111573	4.25945	0.891537	2.2563	0.0015	0.0178968
ENSSSCT00000035920	ENSSSCG00000020657	BCAM	chr6:47198291-47210379	3.95331	0.916792	2.10839	0.0424	0.198322	5.00711	0.916792	2.44931	0.02555	0.140308
ENSSSCT00000027768	ENSSSCG00000028063	TACC2	chr14:142972346-143131283	3.75446	0.907105	2.04926	0.03925	0.188366	3.60983	0.907105	1.99259	0.0429	0.199959
ENSSSCT00000004442	ENSSSCG00000004017	FRMD1	chr1:2657896-2672308	3.70037	0.848682	2.12437	0.0397	0.189956	3.94484	0.848682	2.21667	0.0357	0.176506
ENSSSCT00000015779	ENSSSCG00000014434	IL17B	chr2:157307146-157311262	3.64718	0.967481	1.91448	0.01625	0.102604	3.04467	0.967481	1.65398	0.02975	0.156149
ENSSSCT00000034171	ENSSSCG00000008691	TNIP2	chr8:1115003-1136982	3.19943	0.583946	2.45391	0.049	0.218538	3.80606	0.583946	2.70439	0.03855	0.186236
ENSSSCT00000035776	ENSSSCG00000001342	TRIM39	chr7:26716750-26731477	3.08991	0.949662	1.70208	0.0122	0.0831531	2.84256	0.949662	1.58171	0.01865	0.1132
ENSSSCT00000011449	ENSSSCG00000010462	PCGF5	chr14:112021941-112056577	3.02213	0.937789	1.68823	0.0022	0.0238111	2.34395	0.937789	1.32161	0.01575	0.100248
ENSSSCT00000005434	ENSSSCG00000004924	RASL12	GL894399.1:7202-17480	2.96725	0.954001	1.63706	0.0027	0.0277757	2.40191	0.954001	1.33212	0.012	0.0822103
ENSSSCT00000026454	ENSSSCG00000021595	RRAD	GL896432.1:1-2908	2.85417	0.7502	1.92772	0.0013	0.0160896	2.16158	0.7502	1.52674	0.00665	0.0539718
ENSSSCT00000012943	ENSSSCG00000011831	APOD	chr13:142076175-142094955	2.83998	0.642742	2.14357	0.0129	0.0866778	2.54229	0.642742	1.98381	0.01795	0.110195
ENSSSCT00000006357	ENSSSCG00000005781	TARSL2	chr1:311022066-311077835	2.83825	0.827177	1.77873	5e-05	0.00119245	1.89079	0.827177	1.19272	0.00035	0.0058827
ENSSSCT00000018433	ENSSSCG00000016926	GAPT	chr16:40115254-40115716	2.83672	0.809375	1.80934	0.0206	0.121063	2.44846	0.809375	1.597	0.0348	0.173639
ENSSSCT00000010023	ENSSSCG00000009153	DKK2	chr8:123274616-123279223	2.79946	0.50177	2.48005	0.0045	0.0405666	1.57955	0.50177	1.65442	0.0297	0.156027
ENSSSCT00000014473	ENSSSCG00000013252	F2	chr2:17145001-17170975	2.52912	0.368222	2.77999	5e-05	0.00119245	1.50859	0.368222	2.03455	0.00025	0.00449095
ENSSSCT00000011574	ENSSSCG00000010581	PSD	chr14:123271516-123294058	2.46216	0.633896	1.9576	5e-05	0.00119245	1.46435	0.633896	1.20794	0.0001	0.00214362
ENSSSCT00000027071	ENSSSCG00000025054	EVA1A	GL896025.2:8866-9335	2.42738	0	inf	5e-05	0.00119245	1.97875	0	inf	5e-05	0.00119245
ENSSSCT00000014293	ENSSSCG00000024015	FADS1	chr2:9247471-9263631	2.36942	0.918696	1.36688	0.02245	0.128547	3.46837	0.918696	1.9166	0.0028	0.0285611
ENSSSCT00000018156	ENSSSCG00000016676	INMT	chr18:46529494-46660391	2.33538	0.744782	1.64876	0.0408	0.193354	4.11939	0.744782	2.46754	0.00935	0.0689499
[truncated: 6 more rows]

## Sheet: Table.S1-2
List of top 14 significantly enriched immune-related KEGG signaling pathways
#Term	Database	ID	Input number	Background number	P-Value	Corrected P-Value	Input	Hyperlink
Chemokine signaling pathway	KEGG PATHWAY	ssc04062	31	178	2.35092e-08	5.64221e-07	100522202|396663|100127355|100157949|554303|100135681|414375|100135662|751869|414372|396849|396613|100533200|396880|397447|100514612|396655|100144421|100525766|100127478|100170767|397523|100519668|100622126|733623|780408|448799|100153927|396900|414374|100516546	http://www.genome.jp/kegg-bin/show_pathway?ssc04062/ssc:100622126%09red/ssc:751869%09red/ssc:100522202%09red/ssc:100519668%09red/ssc:100144421%09red/ssc:100516546%09red/ssc:100127355%09red/ssc:414374%09red/ssc:414375%09red/ssc:554303%09red/ssc:414372%09red/ssc:100533200%09red/ssc:733623%09red/ssc:100153927%09red/ssc:396849%09red/ssc:396663%09red/ssc:100135681%09red/ssc:100170767%09red/ssc:1005146…
Cytokine-cytokine receptor interaction	KEGG PATHWAY	ssc04060	34	225	1.09267e-07	2.24778e-06	397094|100521146|100524166|654328|397614|396663|396763|554303|414372|100135681|397395|396826|414375|414374|100217390|399522|396991|396613|100037294|396880|100518179|397122|100622336|100521706|100125969|100519764|100518887|100622126|100155581|733623|100620339|100153254|448799|100517087	http://www.genome.jp/kegg-bin/show_pathway?ssc04060/ssc:100622126%09red/ssc:100620339%09red/ssc:397094%09red/ssc:100521146%09red/ssc:100519764%09red/ssc:100153254%09red/ssc:100521706%09red/ssc:397614%09red/ssc:100518887%09red/ssc:397395%09red/ssc:414374%09red/ssc:414375%09red/ssc:100037294%09red/ssc:554303%09red/ssc:414372%09red/ssc:397122%09red/ssc:733623%09red/ssc:396663%09red/ssc:100135681%09r…
MAPK signaling pathway	KEGG PATHWAY	ssc04010	35	257	6.55347e-07	1.10456e-05	397094|100517416|100127133|100127355|100518950|100738389|100153785|396826|100152997|100518275|100135662|751869|100153404|396610|100153927|100515448|100517077|397122|100514612|397276|100525766|100127478|100170767|100626141|733590|100522174|100519764|100144486|100513840|100622968|396603|100518997|100153248|448810|100524741	http://www.genome.jp/kegg-bin/show_pathway?ssc04010/ssc:448810%09red/ssc:100517416%09red/ssc:751869%09red/ssc:100522174%09red/ssc:397094%09red/ssc:100127133%09red/ssc:100519764%09red/ssc:100153248%09red/ssc:100127355%09red/ssc:733590%09red/ssc:100738389%09red/ssc:100517077%09red/ssc:396603%09red/ssc:100152997%09red/ssc:397122%09red/ssc:100153927%09red/ssc:100626141%09red/ssc:100514612%09red/ssc:1…
Toll-like receptor signaling pathway	KEGG PATHWAY	ssc04620	20	104	1.8388e-06	2.11829e-05	100135681|100037289|397395|397303|397087|396610|396655|100135662|751869|100127355|100144486|100127478|396613|100153927|396880|397441|100037937|397007|100153785|397122	http://www.genome.jp/kegg-bin/show_pathway?ssc04620/ssc:100153785%09red/ssc:751869%09red/ssc:100144486%09red/ssc:100037289%09red/ssc:397395%09red/ssc:100127355%09red/ssc:100037937%09red/ssc:396613%09red/ssc:397087%09red/ssc:397441%09red/ssc:396610%09red/ssc:397122%09red/ssc:397007%09red/ssc:100135662%09red/ssc:396880%09red/ssc:100153927%09red/ssc:396655%09red/ssc:397303%09red/ssc:100135681%09red/…
NF-kappa B signaling pathway	KEGG PATHWAY	ssc04064	18	90	3.67543e-06	3.42034e-05	100155581|100153830|397303|100621326|100521706|100135662|751869|397211|100127355|100513840|396880|100049703|100739325|100533196|100125540|397395|100153785|397122	http://www.genome.jp/kegg-bin/show_pathway?ssc04064/ssc:100125540%09red/ssc:100153830%09red/ssc:100153785%09red/ssc:751869%09red/ssc:100049703%09red/ssc:100533196%09red/ssc:397211%09red/ssc:397395%09red/ssc:100513840%09red/ssc:100155581%09red/ssc:100739325%09red/ssc:397122%09red/ssc:100135662%09red/ssc:100621326%09red/ssc:100521706%09red/ssc:396880%09red/ssc:397303%09red/ssc:100127355%09red
RIG-I-like receptor signaling pathway	KEGG PATHWAY	ssc04622	15	69	9.83141e-06	7.86513e-05	100037289|100513840|100135662|751869|641362|100512827|100127355|396610|100520121|396880|100037290|100125969|100524520|100156436|100145895	http://www.genome.jp/kegg-bin/show_pathway?ssc04622/ssc:751869%09red/ssc:100520121%09red/ssc:100512827%09red/ssc:100037289%09red/ssc:100037290%09red/ssc:396610%09red/ssc:100513840%09red/ssc:100524520%09red/ssc:100125969%09red/ssc:100145895%09red/ssc:100156436%09red/ssc:100135662%09red/ssc:396880%09red/ssc:641362%09red/ssc:100127355%09red
T cell receptor signaling pathway	KEGG PATHWAY	ssc04660	19	110	1.28141e-05	9.0011e-05	100153830|100621326|100144486|396603|100127355|100135662|751869|100134969|100621690|396991|100192439|100127478|397302|100153927|100525766|100518854|100739325|396849|100511843	http://www.genome.jp/kegg-bin/show_pathway?ssc04660/ssc:100153830%09red/ssc:100525766%09red/ssc:751869%09red/ssc:396991%09red/ssc:100621690%09red/ssc:396603%09red/ssc:100518854%09red/ssc:397302%09red/ssc:100134969%09red/ssc:100144486%09red/ssc:100739325%09red/ssc:396849%09red/ssc:100511843%09red/ssc:100135662%09red/ssc:100621326%09red/ssc:100153927%09red/ssc:100127478%09red/ssc:100192439%09red/ss…
TNF signaling pathway	KEGG PATHWAY	ssc04668	18	114	6.10994e-05	0.000325864	100144486|100513840|396826|100142688|100142689|396610|100135662|397449|100520468|100127355|100153785|100127478|396613|100153927|493186|396769|751869|397122	http://www.genome.jp/kegg-bin/show_pathway?ssc04668/ssc:100520468%09red/ssc:100144486%09red/ssc:100153785%09red/ssc:751869%09red/ssc:397122%09red/ssc:100127355%09red/ssc:100142688%09red/ssc:396613%09red/ssc:100513840%09red/ssc:100142689%09red/ssc:396610%09red/ssc:397449%09red/ssc:396769%09red/ssc:100135662%09red/ssc:100153927%09red/ssc:100127478%09red/ssc:493186%09red/ssc:396826%09red
cAMP signaling pathway	KEGG PATHWAY	ssc04024	26	210	7.26723e-05	0.000362448	397457|100520468|100142689|100142688|100157760|396849|396828|396610|396840|397239|100141417|100511786|397447|100514612|397449|100144421|100525766|100127478|397523|100523005|100144486|100511744|100153508|100153927|751869|100519446	http://www.genome.jp/kegg-bin/show_pathway?ssc04024/ssc:751869%09red/ssc:100144421%09red/ssc:100523005%09red/ssc:396828%09red/ssc:396849%09red/ssc:100153927%09red/ssc:100157760%09red/ssc:396840%09red/ssc:397457%09red/ssc:100520468%09red/ssc:397523%09red/ssc:100511786%09red/ssc:397239%09red/ssc:100127478%09red/ssc:100153508%09red/ssc:100525766%09red/ssc:397449%09red/ssc:100519446%09red/ssc:1005117…
Colorectal cancer	KEGG PATHWAY	ssc05210	12	65	0.000285922	0.00105571	396849|100514612|397276|396610|397142|100144486|100127478|100153927|100153922|100049703|448810|100512158	http://www.genome.jp/kegg-bin/show_pathway?ssc05210/ssc:448810%09red/ssc:100049703%09red/ssc:397142%09red/ssc:396610%09red/ssc:100512158%09red/ssc:396849%09red/ssc:100144486%09red/ssc:397276%09red/ssc:100153927%09red/ssc:100127478%09red/ssc:100153922%09red/ssc:100514612%09red
NOD-like receptor signaling pathway	KEGG PATHWAY	ssc04621	10	50	0.000521302	0.00183091	100135662|751869|100620791|100127355|396610|396613|100153927|396880|100153785|397122	http://www.genome.jp/kegg-bin/show_pathway?ssc04621/ssc:100153785%09red/ssc:751869%09red/ssc:396610%09red/ssc:396613%09red/ssc:397122%09red/ssc:100135662%09red/ssc:100153927%09red/ssc:396880%09red/ssc:100620791%09red/ssc:100127355%09red
B cell receptor signaling pathway	KEGG PATHWAY	ssc04662	12	76	0.000985765	0.00308587	100153830|100134969|100127478|100135662|751869|613131|100127355|396603|100153927|100125540|100144486|100155165	http://www.genome.jp/kegg-bin/show_pathway?ssc04662/ssc:100125540%09red/ssc:100153830%09red/ssc:751869%09red/ssc:100144486%09red/ssc:396603%09red/ssc:100134969%09red/ssc:613131%09red/ssc:100155165%09red/ssc:100135662%09red/ssc:100153927%09red/ssc:100127478%09red/ssc:100127355%09red
Wnt signaling pathway	KEGG PATHWAY	ssc04310	16	132	0.00201591	0.00586446	100157640|100134969|100525170|397276|396610|100627056|397211|397142|396603|396849|100153922|100516027|100621622|100519672|448810|100154469	http://www.genome.jp/kegg-bin/show_pathway?ssc04310/ssc:448810%09red/ssc:100516027%09red/ssc:397142%09red/ssc:397211%09red/ssc:396610%09red/ssc:100154469%09red/ssc:100627056%09red/ssc:396603%09red/ssc:100134969%09red/ssc:100525170%09red/ssc:396849%09red/ssc:397276%09red/ssc:100157640%09red/ssc:100621622%09red/ssc:100519672%09red/ssc:100153922%09red
Jak-STAT signaling pathway	KEGG PATHWAY	ssc04630	17	156	0.0040599	0.0101848	100622336|100524166|100153254|396655|397614|399522|100125969|396991|100127478|100037294|493186|100049703|100511742|397648|100620339|397667|448810	http://www.genome.jp/kegg-bin/show_pathway?ssc04630/ssc:448810%09red/ssc:100153254%09red/ssc:100511742%09red/ssc:100049703%09red/ssc:100620339%09red/ssc:100037294%09red/ssc:100622336%09red/ssc:100125969%09red/ssc:396991%09red/ssc:397667%09red/ssc:397648%09red/ssc:396655%09red/ssc:100127478%09red/ssc:100524166%09red/ssc:493186%09red/ssc:399522%09red/ssc:397614%09red
