# Supplementary material for: Identification and Characterization of MAPK Signaling Pathway Genes and Associated lncRNAs in the Ileum of Piglets Infected by Clostridium perfringens Type C
Source: Biomed Res Int. 2020 Aug 12;2020:8496872. doi: 10.1155/2020/8496872 (PMC7443001; doi:10.1155/2020/8496872)
Supplement: Supplementary Materials — Additional file: Table S1: list of differentially expressed genes and immune-related KEGG enrichment pathways in the ileum of piglets infected with Clostridium perfringens type C. Table S2: primer sequences for the real-time PCR analysis of genes and lncRNAs associated with MAPK signaling pathway genes. Table S3: list of 35 lncRNAs targeting MAPK signaling pathway genes and differentially expressed in the ileum of C. perfringens type C-infected piglets. [file 8496872.f1.zip › Table S2.xlsx]

## Sheet: Table.S2
Primer sequences for the real-time PCR analysis of MAPK signaling pathway genes and lncRNAs targeting MAPK signaling genes
Gene	Primer	Nucleotide sequence (5′-3′)	Length	Accession No.
DUSP6	Forward	ACTGGAACGAGAATACGGGC	149	NM_001267842.1
	Reverse	GCCGTCTAGATTGGTCTCGC
DUSP10	Forward	ACTTGATGAAACACACGCGG	138	XM_013980028.2
	Reverse	GTGTCACGCCGTTGTTTAGG
FGF19	Forward	TGAGGACTGTGCTTTCGAGG	80	XM_003122420.3
	Reverse	AGACGGGCAGATGGTGTTTC
FGFR1	Forward	TCCGTCAACGTCTCAGATGC	108	XM_005671767.3
	Reverse	GGGCATACGGTTTGGTTTGG
FOS	Forward	TGACTGACACACTCCAAGCG	145	NM_001123113.1
	Reverse	TCATCAGGGATCTTGCAGGC
MEF2C	Forward	ACTCCCAGTCTGCTCAGTCA	81	XM_021082279.1
	Reverse	ATCCTCCCATCCCTTGTCCT
PDGFA	Forward	GGAAGAGAAGCATCGAGGAGG	105	XM_013987661.2
	Reverse	TCAGAAAGTTGGCGGACGTG
TAB1	Forward	TGGAGCGGGAGGTTTCGG	144	XM_021090931.1
	Reverse	CCATGTTCAGCTGCGTCACC
TRADD	Forward	CTCAGTGGGCCTCAAGTGG	130	XM_021094051.1
	Reverse	CTGAAAGGCCTGCTCGTACA
TP53	Forward	GGGCCGAGTACTTGGATGAC	223	NM_213824.3
	Reverse	GCACAAACACGCACCTCAAA
MAPK1	Forward	ATGCAAATATCTCTCTCGGTCTC	100	XM_021071922.1
	Reverse	CGAGCCAGGTTTGTGAGAG
NFKB1	Forward	CCCATGTAGACAGCACCACCTA	129	NM_001048232.1
	Reverse	GAGGCTCAAAGTTCTCCACCA
GADD45G	Forward	AGAAGTTCGCGGCCAGGATA	137	NM_001185129.1
	Reverse	GGACTTTGGCGGACTCGTAG
MYC	Forward	AGAGATGCCATGTGTCCACG	215	NM_001005154.1
	Reverse	CTCGTTTCTCCTCTGGCGTT
IKBKG	Forward	AGTGTATCGAGTAGGCCGCC	146	XM_021079371.1
	Reverse	CCAGAAAGAGGTCGACCAGCA
FGFR4	Forward	CCATGATCTCCAGCAACGGT	208	XM_013987555.2
	Reverse	TGTCCATCCTTAAGCCAGCG
BRAF	Forward	CAAGGGAAAGTGGCATGGTG	80	XM_021078588.1
	Reverse	TGAAGGCCTGTAACTGCTGAG
MECOM	Forward	GGACCCTAGCAACCTTCAGC	116	XM_021071149.1
	Reverse	GCTTGTGTTGTTTGAGGCCC
RPS6KA3	Forward	CAAACGGCCCTGATGATACA	175	XM_021080351.1
	Reverse	GGATGTCTGAGCACAAGGG
MAPK8	Forward	TCAGGAGCTCAAGGAATAGTATG	88	XM_021073087.1
	Reverse	TCTGAAATGGCCGGCTTAAC
ELK4	Forward	CAAGCGTTGGAGACTTTGGC	99	XM_005667536.3
	Reverse	ACTAGGAGGTGCGGTGGTAA
MAPKAPK5	Forward	GAAGTATAACCGGGAATGCAAACT	140	NM_001143694.1
	Reverse	GGGATGTGGTCTGCTCTTCT
TRAF2	Forward	GATCTCCGACTTCGCCAGG	110	XM_005652719.2
	Reverse	CGCGCAGACACATCTTGTAG
CHUK	Forward	GTCCCTGCACACCGAAATCA	99	NM_001114279.1
	Reverse	TAGAGATCAATGGCGCGCTG
PAK1	Forward	CACAGGCGAGTTTACAGGGA	140	XM_021062561.1
	Reverse	TGTTGGAGGTCTTCTTCGAGTT
ALDBSSCT0000004760	Forward	ATGGTGAGCAAATGAAATGTCCA	134	1046-1179
	Reverse	TGCTGTTTTCAGACTGCCCA
ALDBSSCT0000006510	Forward	ACACCACCTAAACCGCAAGA	81	441-522
	Reverse	CCGTTTTCAATCTTGCAGCGA
ALDBSSCT0000006650	Forward	AGTCGCCATCCCCTTCTTTG	116	108-224
	Reverse	GGACAAAACGGCCTCTTAACC
ALDBSSCT0000002686	Forward	GTGGCAAAACAGGATTGGTGG	111	519-630
	Reverse	TCGAACATGAGCCTGTGATCT
ALDBSSCT0000004038	Forward	GGCTTTCCTGTGGTCTCTTGT	109	139-247
	Reverse	CGTCATCGAGCCAGGGTTTG
β-actin	Forward	ATATTGCTGCGCTCGTGGT	148	XM_003124280.5
	Reverse	TAGGAGTCCTTCTGGCCCAT
