# Supplementary material for: Identification and Characterization of MAPK Signaling Pathway Genes and Associated lncRNAs in the Ileum of Piglets Infected by Clostridium perfringens Type C
Source: Biomed Res Int. 2020 Aug 12;2020:8496872. doi: 10.1155/2020/8496872 (PMC7443001; doi:10.1155/2020/8496872)
Supplement: Supplementary Materials — Additional file: Table S1: list of differentially expressed genes and immune-related KEGG enrichment pathways in the ileum of piglets infected with Clostridium perfringens type C. Table S2: primer sequences for the real-time PCR analysis of genes and lncRNAs associated with MAPK signaling pathway genes. Table S3: list of 35 lncRNAs targeting MAPK signaling pathway genes and differentially expressed in the ileum of C. perfringens type C-infected piglets. [file 8496872.f1.zip › Table S3.xlsx]

## Sheet: Table S3
List of 34 lncRNAs targeting MAPK signaling pathway genes and differentially expressed in the ileum of C. perfringens type C infected piglets
mRNA	mRNA-targeted lncRNA(trans)
BRAF	ALDBSSCT0000008940	ALDBSSCG0000005470
	LNC_000486	XLOC_026401
	ALDBSSCT0000002407	ALDBSSCG0000001457
	LNC_000796	XLOC_041457
	LNC_000477	XLOC_025703
	ALDBSSCT0000003968	ALDBSSCG0000002390
	LNC_000686	XLOC_034904
IKBKG	ALDBSSCT0000002686	ALDBSSCG0000001631
	LNC_001291	XLOC_069670
	ALDBSSCT0000008223	ALDBSSCG0000004992
	LNC_001496	XLOC_080321
	LNC_000556	XLOC_029154
	ALDBSSCT0000006650	ALDBSSCG0000004067
IL1B1	LNC_001171	XLOC_064243
	LNC_000378	XLOC_020704
	ENSSSCT00000033304	ENSSSCG00000015579
	LNC_000157	XLOC_007804
GADD45G	ALDBSSCT0000002553	ALDBSSCG0000001548
	LNC_001539	XLOC_083377
	LNC_000841	XLOC_044994
IL1A	LNC_000378	XLOC_020704
	ENSSSCT00000033304	ENSSSCG00000015579
	LNC_000157	XLOC_007804
MEF2C	LNC_000528	XLOC_028016
	LNC_000854	XLOC_046052
	ALDBSSCT0000008856	ALDBSSCG0000005411
MECOM	ALDBSSCT0000007662	ALDBSSCG0000004652
	ALDBSSCT0000010255	ALDBSSCG0000006234
PAK1	LNC_001291	XLOC_069670
	ALDBSSCT0000000192	ALDBSSCG0000000108
PPP3CB	LNC_000048	XLOC_002263
	LNC_000767	XLOC_039750
MAPKAPK5	ALDBSSCT0000000346	ALDBSSCG0000000207
	ALDBSSCT0000002686	ALDBSSCG0000001631
FGFR1	ENSSSCT00000033304	ENSSSCG00000015579
	LNC_000157	XLOC_007804
FLNC	ALDBSSCT0000011852	ALDBSSCG0000007201
ELK4	ALDBSSCT0000000346	ALDBSSCG0000000207
MAPK8	ALDBSSCT0000004760	ALDBSSCG0000002897
PPM1A	ALDBSSCT0000011950	ALDBSSCG0000007272
FGF19	LNC_001291	XLOC_069670
CHUK	ALDBSSCT0000004038	ALDBSSCG0000002436
MAPK1	ALDBSSCT0000003606	ALDBSSCG0000002158
TRAF2	ALDBSSCT0000006510	ALDBSSCG0000003978

## Sheet: lncRNA_IR_vs_IC
transcript_id	gene_id	gene_name	gene_location	IR_FPKM	IC_FPKM	log2(foldchange)	pvalue	qvalue
ALDBSSCT0000008940	ALDBSSCG0000005470	-	chr6:76018319-76025834	30.3046	100.945	-1.73596	5e-05	0.00119245
LNC_000486	XLOC_026401	-	chr11:6497518-6510982	3.82924	10.4967	-1.45481	5e-05	0.00119245
ALDBSSCT0000002407	ALDBSSCG0000001457	-	chr12:24004718-24010077	1.56181	5.36001	-1.77902	0.00565	0.0479669
LNC_000796	XLOC_041457	-	chr14:48665049-48715784	0.773003	1.51873	-0.974318	5e-05	0.00119245
LNC_000477	XLOC_025703	-	chr11:22380921-22384388	0.417885	2.11534	-2.33971	5e-05	0.00119245
ALDBSSCT0000003968	ALDBSSCG0000002390	-	chr14:71960120-71964828	68.983	173.241	-1.32847	5e-05	0.00119245
LNC_000686	XLOC_034904	-	chr13:43450507-43455163	1.36938	4.29368	-1.6487	5e-05	0.00119245
ALDBSSCT0000002686	ALDBSSCG0000001631	-	chr13:81539716-81540448	23.7508	53.6733	-1.17623	5e-05	0.00119245
LNC_001291	XLOC_069670	-	chr4:112982242-113037115	0	1.3656	#NAME?	0.0001	0.00214362
ALDBSSCT0000008223	ALDBSSCG0000004992	-	chr5:342976-347552	1.83377	4.98288	-1.44217	0.0001	0.00214362
LNC_001496	XLOC_080321	-	chr6:25454046-25461734	1.33488	3.86114	-1.53232	5e-05	0.00119245
LNC_000556	XLOC_029154	-	chr12:62288946-62297976	0.648851	1.60785	-1.30917	5e-05	0.00119245
ALDBSSCT0000006650	ALDBSSCG0000004067	-	chr3:40281582-40285210	2.17952	4.87867	-1.16247	0.00055	0.00838524
LNC_001171	XLOC_064243	-	chr3:106167295-106174176	1.57795	4.11359	-1.38234	5e-05	0.00119245
LNC_000378	XLOC_020704	-	chr1:242342196-242355258	1.31329	3.49032	-1.41017	0.0001	0.00214362
ENSSSCT00000033304	ENSSSCG00000015579	PTGS2	chr9:140251517-140260362	1.37208	3.10137	-1.17654	0.00035	0.0058827
LNC_000157	XLOC_007804	-	GL895524.1:10258-13463	0	1.38471	#NAME?	5e-05	0.00119245
ALDBSSCT0000002553	ALDBSSCG0000001548	-	chr13:4251195-4251926	0.821559	2.43708	-1.56872	5e-05	0.00119245
LNC_001539	XLOC_083377	-	chr7:11867531-11952398	0.330466	1.30072	-1.97674	5e-05	0.00119245
LNC_000841	XLOC_044994	-	chr15:87089941-87106496	0.0678432	0.461081	-2.76474	5e-05	0.00119245
LNC_000528	XLOC_028016	-	chr12:15060545-15077039	0.295896	0.973839	-1.71859	5e-05	0.00119245
LNC_000854	XLOC_046052	-	chr15:145073722-145100991	7.40637	28.5929	-1.94882	5e-05	0.00119245
ALDBSSCT0000008856	ALDBSSCG0000005411	-	chr6:51067287-51069391	1.01555	3.38658	-1.73756	5e-05	0.00119245
ALDBSSCT0000007662	ALDBSSCG0000004652	-	chr4:106586725-106589020	1.08037	4.24381	-1.97383	5e-05	0.00119245
ALDBSSCT0000010255	ALDBSSCG0000006234	-	chr7:92003905-92018623	29.9327	51.4246	-0.780737	0.0004	0.00655605
ALDBSSCT0000000192	ALDBSSCG0000000108	-	chr1:86961610-86986593	2.334	4.69781	-1.00918	0.00035	0.0058827
LNC_000048	XLOC_002263	-	GL893248.2:30137-30980	0.696327	4.07947	-2.55054	0.0014	0.0169856
LNC_000767	XLOC_039750	-	chr14:82499485-82518489	2.6386	4.97789	-0.91576	0.0001	0.00214362
ALDBSSCT0000000346	ALDBSSCG0000000207	-	chr1:179704450-179706225	6.65201	16.2952	-1.29259	5e-05	0.00119245
ALDBSSCT0000011852	ALDBSSCG0000007201	-	GL896302.1:108888-110179	11.123	5.71092	0.961753	0.00315	0.0312883
ALDBSSCT0000004760	ALDBSSCG0000002897	-	chr16:38491012-38492742	31.4124	49.7088	-0.662168	0.0007	0.010104
ALDBSSCT0000011950	ALDBSSCG0000007272	-	chrX:86697705-86698443	11.3813	5.89247	0.949718	0.00155	0.0183734
ALDBSSCT0000004038	ALDBSSCG0000002436	-	chr14:120712243-120713987	0.918968	2.45596	-1.4182	0.0019	0.0214646
ALDBSSCT0000003606	ALDBSSCG0000002158	-	chr14:53504967-53505821	8.76178	2.886	1.60215	5e-05	0.00119245
ALDBSSCT0000006510	ALDBSSCG0000003978	-	chr2:157383170-157384842	19.744	29.288	-0.568894	0.00835	0.0635229

## Sheet: lncRNA_IS_vs_IC
transcript_id	gene_id	gene_name	gene_location	IS_FPKM	IC_FPKM	log2(foldchange)	pvalue	qvalue
ALDBSSCT0000008940	ALDBSSCG0000005470	-	chr6:76018319-76025834	31.4413	100.945	-1.68284	5e-05	0.00119245
LNC_000486	XLOC_026401	-	chr11:6497518-6510982	2.53458	10.4967	-2.05012	5e-05	0.00119245
LNC_000796	XLOC_041457	-	chr14:48665049-48715784	0.624063	1.51873	-1.2831	5e-05	0.00119245
LNC_000477	XLOC_025703	-	chr11:22380921-22384388	0.243698	2.11534	-3.11772	5e-05	0.00119245
ALDBSSCT0000003968	ALDBSSCG0000002390	-	chr14:71960120-71964828	64.4712	173.241	-1.42605	5e-05	0.00119245
LNC_000686	XLOC_034904	-	chr13:43450507-43455163	1.09538	4.29368	-1.97078	5e-05	0.00119245
ALDBSSCT0000002686	ALDBSSCG0000001631	-	chr13:81539716-81540448	21.4977	53.6733	-1.32002	5e-05	0.00119245
LNC_001291	XLOC_069670	-	chr4:112982242-113037115	0	1.3656	#NAME?	0.0001	0.00214362
ALDBSSCT0000008223	ALDBSSCG0000004992	-	chr5:342976-347552	1.12292	4.98288	-2.14972	5e-05	0.00119245
LNC_001496	XLOC_080321	-	chr6:25454046-25461734	1.40206	3.86114	-1.46148	5e-05	0.00119245
LNC_000556	XLOC_029154	-	chr12:62288946-62297976	0.592077	1.60785	-1.44127	5e-05	0.00119245
ALDBSSCT0000006650	ALDBSSCG0000004067	-	chr3:40281582-40285210	1.87691	4.87867	-1.37813	0.00025	0.00449095
LNC_001171	XLOC_064243	-	chr3:106167295-106174176	1.03586	4.11359	-1.98956	5e-05	0.00119245
LNC_000378	XLOC_020704	-	chr1:242342196-242355258	0.8869	3.49032	-1.97652	5e-05	0.00119245
ENSSSCT00000033304	ENSSSCG00000015579	PTGS2	chr9:140251517-140260362	1.12284	3.10137	-1.46575	5e-05	0.00119245
LNC_000157	XLOC_007804	-	GL895524.1:10258-13463	0	1.38471	#NAME?	5e-05	0.00119245
ALDBSSCT0000002553	ALDBSSCG0000001548	-	chr13:4251195-4251926	0.521559	2.43708	-2.22425	5e-05	0.00119245
LNC_001539	XLOC_083377	-	chr7:11867531-11952398	0.517829	1.30072	-1.32876	5e-05	0.00119245
LNC_000841	XLOC_044994	-	chr15:87089941-87106496	0.00835249	0.461081	-5.78667	5e-05	0.00119245
LNC_000528	XLOC_028016	-	chr12:15060545-15077039	0.313776	0.973839	-1.63395	0.00085	0.0116991
LNC_000854	XLOC_046052	-	chr15:145073722-145100991	8.11923	28.5929	-1.81624	0.00025	0.00449095
ALDBSSCT0000008856	ALDBSSCG0000005411	-	chr6:51067287-51069391	1.06167	3.38658	-1.67349	5e-05	0.00119245
ALDBSSCT0000007662	ALDBSSCG0000004652	-	chr4:106586725-106589020	1.16351	4.24381	-1.86687	5e-05	0.00119245
ALDBSSCT0000010255	ALDBSSCG0000006234	-	chr7:92003905-92018623	24.2969	51.4246	-1.08169	5e-05	0.00119245
ALDBSSCT0000000192	ALDBSSCG0000000108	-	chr1:86961610-86986593	2.02764	4.69781	-1.21219	0.0001	0.00214362
LNC_000048	XLOC_002263	-	GL893248.2:30137-30980	0	4.07947	#NAME?	5e-05	0.00119245
LNC_000767	XLOC_039750	-	chr14:82499485-82518489	2.45854	4.97789	-1.01773	0.0003	0.00520502
ALDBSSCT0000004760	ALDBSSCG0000002897	-	chr16:38491012-38492742	32.8844	49.7088	-0.596099	0.00355	0.034246
ALDBSSCT0000000346	ALDBSSCG0000000207	-	chr1:179704450-179706225	5.46947	16.2952	-1.57498	5e-05	0.00119245
ALDBSSCT0000004038	ALDBSSCG0000002436	-	chr14:120712243-120713987	1.1095	2.45596	-1.14638	0.0051	0.0445568
ALDBSSCT0000003606	ALDBSSCG0000002158	-	chr14:53504967-53505821	9.12272	2.886	1.66039	5e-05	0.00119245
ALDBSSCT0000006510	ALDBSSCG0000003978	-	chr2:157383170-157384842	17.8447	29.288	-0.714813	0.0014	0.0169856
